# Supplementary material for: Ribosomal mutations enable a switch between high fitness and high stress resistance in Listeria monocytogenes
Source: Front Microbiol. 2024 Mar 28;15:1355268. doi: 10.3389/fmicb.2024.1355268 (PMC11006974; doi:10.3389/fmicb.2024.1355268)
Supplement: Supplementary file 4 [file Table_4.XLSX]

## Sheet: Sheet1
Supplemental Table 4: RNAseq data comparing L. monocytogenes V14, 14EV1, and 14EV2 to the wild type. The p-value and log2(Fold change) in bold are considered significant.
gene.ID	protein.ID	EGDe.locus	gene.name	protein.name	SigB.regulon	motility.related	V14/LO28 WT		14EV1/LO28 WT		14EV2/LO28 WT
							p.value	log2.fold.change	p.value	log2.fold.change	p.value	log2.fold.change
IEJ01_04465	NP_464406.1	lmo0880	-	wall associated protein precursor	Yes		0	9.7	0	2.31	0.022	0.75
IEJ01_05065	NP_464519.1	lmo0994	-	hypothetical protein lmo0994	Yes		0	8.59	0	2.25	0.071	0.4
IEJ01_04655	NP_464439.1	lmo0913	-	succinate semialdehyde dehydrogenase	Yes		0	8.58	0	1.6	0.584	0.08
IEJ01_01380	NP_463794.1	lmo0263	inlH	internalin H	Yes		0	7.58	0	1.61	0.175	0.25
IEJ01_03045	NP_464124.1	lmo0596	-	hypothetical protein lmo0596	Yes		0	7.54	0	1.36	0.142	0.25
IEJ01_05070	NP_464520.1	lmo0995	-	hypothetical protein lmo0995	Yes		0	7.5	0	1.15	0.054	0.33
IEJ01_03420	NP_464197.1	lmo0670	-	hypothetical protein lmo0670	Yes		0	7.44	0.477	0.07	0.872	-0.02
IEJ01_11865	NP_465793.2	lmo2269	-	hypothetical protein lmo2269	Yes		0	7.41	0.135	0.12	0.625	-0.06
IEJ01_01390	NP_463796.1	lmo0265	-	succinyl-diaminopimelate desuccinylase	Yes		0	7.37	0	1.41	0.664	0.07
IEJ01_00665	NP_463666.1	lmo0133	-	hypothetical protein lmo0133	Yes		0	7.24	0.014	1.12	0.249	0.17
IEJ01_03415	NP_464196.1	lmo0669	-	oxidoreductase	Yes		0	7.23	0.041	0.52	0.26	-0.19
IEJ01_14510	NP_466270.1	lmo2748	-	hypothetical protein lmo2748	Yes		0	7.2	0	1.09	0.581	0.1
IEJ01_07460	NP_464950.1	lmo1425	opuCD	glycine/betaine ABC transporter permease	Yes		0	7.16	0	1.25	0.024	0.39
IEJ01_07465	NP_464951.1	lmo1426	opuCC	glycine/betaine ABC transporter substrate-binding protein	Yes		0	7.04	0	1.03	0.135	0.27
IEJ01_11670	NP_465754.1	lmo2230	-	arsenate reductase	Yes		0	6.95	0.002	1.26	0.795	0.04
IEJ01_11585	NP_465737.1	lmo2213	-	hypothetical protein lmo2213	Yes		0	6.92	0	1.73	0.591	0.09
IEJ01_03075	NP_464129.1	lmo0602	-	transcripitonal regulator	Yes		0	6.86	0	1.03	0.097	0.29
IEJ01_09635	NP_465355.1	lmo1830	-	short-chain dehydrogenase	Yes		0	6.77	0	1.04	0.989	0
IEJ01_11305	NP_465681.1	lmo2157	sepA	hypothetical protein lmo2157	Yes		0	6.67	0	0.75	0.414	0.12
IEJ01_08935	NP_465219.1	lmo1694	-	CDP-abequose synthase	Yes		0	6.67	0	0.97	0.748	0.06
IEJ01_07475	NP_464953.1	lmo1428	opuCA	glycine/betaine ABC transporter ATP-binding protein	Yes		0	6.57	0	0.85	0.895	-0.02
IEJ01_07470	NP_464952.1	lmo1427	opuCB	glycine/betaine ABC transporter permease	Yes		0	6.52	0.013	0.51	0.713	-0.06
IEJ01_00095	NP_463552.1	lmo0019	-	hypothetical protein lmo0019	Yes		0	6.49	0.087	0.33	0.353	-0.13
IEJ01_14255	NP_466219.1	lmo2697	-	PTS mannose transporter subunit IIA	Yes		0	6.43	0.001	0.74	0.011	0.53
IEJ01_11310	NP_465682.1	lmo2158	-	hypothetical protein lmo2158	Yes		0	6.36	0.047	0.33	0.005	-0.48
IEJ01_14065	NP_466195.1	lmo2673	-	hypothetical protein lmo2673	Yes		0	6.28	0.186	0.13	0.66	-0.06
IEJ01_04775	NP_464462.1	lmo0937	-	hypothetical protein lmo0937	Yes		0	6.19	0	1.18	0.092	0.26
IEJ01_03205	NP_464155.1	lmo0628	-	hypothetical protein lmo0628	Yes		0	6.18	0.316	0.1	0.007	0.94
IEJ01_00670	NP_463667.1	lmo0134	-	hypothetical protein lmo0134	Yes		0	6.01	0.044	0.5	0.513	0.11
IEJ01_10915	NP_465609.1	lmo2085	-	peptidoglycan binding protein	Yes		0	5.9	0	0.86	0.01	0.46
IEJ01_14250	NP_466218.1	lmo2696	-	dihydroxyacetone kinase	Yes		0	5.86	0.131	0.26	0.932	-0.02
IEJ01_06525	NP_464766.1	lmo1241	-	hypothetical protein lmo1241	Yes		0	5.81	0.002	0.54	0.408	0.13
IEJ01_03680	NP_464249.1	lmo0722	-	pyruvate oxidase	Yes		0	5.71	0.043	0.37	0.214	0.21
IEJ01_04855	NP_464478.1	lmo0953	-	hypothetical protein lmo0953	Yes		0	5.66	0	1.05	0	0.61
IEJ01_01670	NP_463851.1	lmo0321	-	hypothetical protein lmo0321	Yes		0	5.57	0.197	0.21	0.185	-0.25
IEJ01_02255	NP_463968.1	lmo0439	-	hypothetical protein lmo0439	Yes		0	5.48	0.135	0.25	0.987	0
IEJ01_02640	NP_464043.1	lmo0515	-	hypothetical protein lmo0515	Yes		0	5.45	0	1.02	0.146	0.26
IEJ01_13525	NP_466096.1	lmo2573	-	zinc-binding dehydrogenase	Yes		0	5.31	0.016	0.37	0.444	-0.12
IEJ01_10820	NP_465591.1	lmo2067	-	bile acid hydrolase	Yes		0	5.3	0	0.55	0.94	-0.01
IEJ01_03975	NP_464309.1	lmo0782	-	PTS mannose transporter subunit IIC	Yes		0	5.2	0.335	-0.13	0	-0.44
IEJ01_02250	NP_463967.1	lmo0438	-	hypothetical protein lmo0438	Yes		0	5.2	0.073	0.13	0.008	1.69
IEJ01_12600	NP_465914.1	lmo2391	-	hypothetical protein lmo2391	Yes		0	5.18	0.165	0.22	0.364	-0.14
IEJ01_05700	NP_464665.1	lmo1140	-	hypothetical protein lmo1140	Yes		0	5.16	0.002	0.67	0.236	0.2
IEJ01_03970	NP_464308.1	lmo0781	-	PTS mannose transporter subunit IID	Yes		0	5.08	0.403	-0.11	0	-0.52
IEJ01_14245	NP_466217.1	lmo2695	-	dihydroxyacetone kinase subunit DhaK	Yes		0	4.97	0.329	0.15	0.017	-0.43
IEJ01_13515	NP_466094.1	lmo2571	-	nicotinamidase	Yes		0	4.91	0.615	0.08	0.043	-0.37
IEJ01_13510	NP_466093.1	lmo2570	-	hypothetical protein lmo2570	Yes		0	4.86	0.166	0.22	0.894	0.02
IEJ01_04035	NP_464321.1	lmo0794	-	hypothetical protein lmo0794	Yes		0	4.83	0.905	-0.03	0.873	-0.03
IEJ01_03115	NP_464137.1	lmo0610	-	internalin	Yes		0	4.68	0.005	0.44	0.117	0.23
IEJ01_12820	NP_465957.1	lmo2434	-	glutamate decarboxylase	Yes		0	4.67	0.193	0.2	0.996	0
IEJ01_13520	NP_466095.1	lmo2572	-	dihydrofolate reductase subunit A	Yes		0	4.66	0.697	-0.06	0.108	-0.3
IEJ01_02285	NP_463974.1	lmo0445	-	transcripitonal regulator	Yes		0	4.63	0.51	0.1	0.498	0.11
IEJ01_13710	NP_466125.1	lmo2602	-	hypothetical protein lmo2602	Yes		0	4.62	0.999	0	0.625	-0.08
IEJ01_03980	NP_464310.1	lmo0783	-	PTS mannose transporter subunit IIB	Yes		0	4.6	0.983	-0.01	0	-0.64
IEJ01_02760	NP_464067.1	lmo0539	-	tagatose 1,6-diphosphate aldolase	Yes		0	4.58	0.02	0.28	0.217	0.16
IEJ01_11180	NP_465656.1	lmo2132	-	hypothetical protein lmo2132	Yes		0	4.52	0.96	0.01	0.214	0.22
IEJ01_07970	NP_465051.1	lmo1526	-	hypothetical protein lmo1526	Yes		0	4.43	0.892	-0.02	0.885	0.02
IEJ01_12580	NP_465910.1	lmo2387	-	hypothetical protein lmo2387	Yes		0	4.38	0.047	0.32	0.139	0.23
IEJ01_00845	NP_463702.1	lmo0169	-	glucose transporter	Yes		0	4.36	0.952	-0.01	0.49	-0.1
IEJ01_03985	NP_464311.1	lmo0784	-	PTS mannose transporter subunit IIB	Yes		0	4.34	0.933	0.02	0	-0.53
IEJ01_00215	NP_463576.1	lmo0043	-	arginine deiminase	Yes		0	4.22	0.697	0.07	0.952	0.01
IEJ01_07440	NP_464946.1	lmo1421	-	glycine/betaine ABC transporter ATP-binding protein	Yes		0	4.12	0.951	0.01	0.841	0.03
IEJ01_02225	NP_463962.1	lmo0433	inlA	internalin A	Yes		0	4.01	0.14	-0.2	0.044	-0.26
IEJ01_11675	NP_465755.1	lmo2231	-	hypothetical protein lmo2231	Yes		0	3.88	0.71	0.06	0.705	-0.07
IEJ01_03010	NP_464117.1	lmo0589	-	hypothetical protein lmo0589			0	3.87	0.596	-0.07	0.452	-0.13
IEJ01_13130	NP_466018.1	lmo2495	-	phosphate ABC transporter ATP-binding protein			0	3.86	0.002	0.96	0.038	0.52
IEJ01_07445	NP_464947.1	lmo1422	-	glycine/betaine ABC transporter permease	Yes		0	3.85	0.359	-0.13	0.316	-0.14
IEJ01_00125	NP_463558.1	lmo0025	-	phosphoheptose isomerase	Yes		0	3.78	0.598	0.05	0.429	0.1
IEJ01_12640	NP_465921.1	lmo2398	ltrC	hypothetical protein lmo2398	Yes		0	3.77	0.743	0.05	0.996	0
IEJ01_07500	NP_464958.1	lmo1433	-	glutathione reductase	Yes		0	3.77	0.899	-0.03	0.603	0.08
IEJ01_04645	NP_464437.1	lmo0911	-	hypothetical protein lmo0911	Yes		0	3.75	0.033	0.26	0.98	0
IEJ01_12965	NP_465986.1	lmo2463	-	multidrug transporter	Yes		0	3.72	0.679	-0.06	0.448	-0.1
IEJ01_13080	NP_466008.1	lmo2485	-	hypothetical protein lmo2485	Yes		0	3.7	0.653	-0.07	0.155	-0.23
IEJ01_11870	NP_465794.1	lmo2270	comK'	competence protein ComK			0	3.67	0.123	0.26	0.524	0.11
IEJ01_03340	NP_464181.1	lmo0654	-	hypothetical protein lmo0654	Yes		0	3.67	0	0.62	0.608	0.08
IEJ01_04045	NP_464323.1	lmo0796	-	hypothetical protein lmo0796	Yes		0	3.66	0.155	-0.19	0	-0.47
IEJ01_03345	NP_464182.1	lmo0655	-	phosphoprotein phosphatase	Yes		0	3.63	0.001	0.49	0.713	0.06
IEJ01_14390	NP_466246.1	lmo2724	-	hypothetical protein lmo2724	Yes		0	3.63	0.933	0.02	0.215	-0.17
IEJ01_02835	NP_464082.1	lmo0554	-	NADH-dependent butanol dehydrogenase	Yes		0	3.59	0.957	-0.01	0.179	-0.17
IEJ01_02090	NP_463935.1	lmo0405	-	phosphate transporter	Yes		0	3.58	0.693	0.07	0.996	0
IEJ01_12925	NP_465977.1	lmo2454	-	hypothetical protein lmo2454	Yes		0	3.53	0.989	0	0.062	-0.24
IEJ01_03310	NP_464175.1	lmo0648	-	hypothetical protein lmo0648			0	3.49	0.967	0.01	0.957	0.01
IEJ01_13715	NP_466126.1	lmo2603	-	hypothetical protein lmo2603	Yes		0	3.47	0.482	0.11	0.725	0.06
IEJ01_06635	NP_464786.1	lmo1261	-	hypothetical protein lmo1261	Yes		0	3.28	0.189	0.15	0.802	0.03
IEJ01_03015	NP_464118.1	lmo0590	-	hypothetical protein lmo0590	Yes		0	3.27	0.989	0	0.055	-0.36
IEJ01_03020	NP_464119.1	lmo0591	-	hypothetical protein lmo0591	Yes		0	3.18	0.796	0.04	0.486	-0.12
IEJ01_12335	NP_465879.1	lmo2356	-	hypothetical protein lmo2356			0	3.15	0.886	-0.02	0.759	0.04
IEJ01_13125	NP_466017.1	lmo2494	-	PhoU family transcriptional regulator	Yes		0	3.15	0.019	0.47	0.001	0.64
IEJ01_08035	NP_465064.1	lmo1539	-	glycerol transporter	Yes		0	3.09	0.632	0.08	0.936	0.01
IEJ01_01675	NP_463852.1	lmo0322	-	hypothetical protein lmo0322			0	3.07	0.272	-0.11	0.89	-0.02
IEJ01_09895	NP_465407.1	lmo1883	-	chitinase	Yes		0	3.06	0.713	-0.05	0.397	-0.14
IEJ01_03305	NP_464174.1	lmo0647	-	hypothetical protein lmo0647			0	3.04	0	0.62	0	0.5
IEJ01_11545	NP_465729.1	lmo2205	-	phosphoglyceromutase	Yes		0	3.01	0.227	0.14	0.165	0.15
IEJ01_14060	NP_466194.1	lmo2672	-	AraC family transcriptional regulator	Yes		0	2.92	0.812	-0.04	0.464	-0.11
IEJ01_00850	NP_463703.1	lmo0170	-	hypothetical protein lmo0170	Yes		0	2.79	0.933	0.02	0.86	0.03
IEJ01_01045	NP_463742.1	lmo0211	ctc	50S ribosomal protein L25	Yes		0	2.74	0.287	0.15	0.738	0.05
IEJ01_13150	NP_466022.1	lmo2499	-	phosphate ABC transporter substrate-binding protein			0	2.71	0	1.07	0	1.01
IEJ01_12355	NP_465883.1	lmo2360	-	transmembrane protein			0	2.7	0.256	0.13	0.108	0.33
IEJ01_08350	NP_465126.1	lmo1601	-	general stress protein	Yes		0	2.69	0	0.41	0.237	0.13
IEJ01_09480	NP_465324.1	lmo1799	-	peptidoglycan binding protein	Yes		0	2.69	0.866	0.03	0.033	0.44
IEJ01_10430	NP_465513.1	lmo1989	leuC	isopropylmalate isomerase large subunit			0	2.68	0.001	0.76	0	1.34
IEJ01_10440	NP_465515.1	lmo1991	ilvA	threonine dehydratase			0	2.66	0.001	0.91	0	1.04
IEJ01_12360	NP_465884.1	lmo2361	-	hypothetical protein lmo2361			0	2.64	0.34	0.09	0.063	0.45
IEJ01_03210	NP_464156.1	lmo0629	-	hypothetical protein lmo0629	Yes		0	2.63	0.323	0.15	0.227	0.18
IEJ01_10435	NP_465514.1	lmo1990	leuD	isopropylmalate isomerase small subunit			0	2.62	0.009	0.94	0.002	1.09
IEJ01_08355	NP_465127.1	lmo1602	-	hypothetical protein lmo1602	Yes		0	2.59	0	0.51	0.013	0.22
IEJ01_08240	NP_465105.1	lmo1580	-	hypothetical protein lmo1580	Yes		0	2.56	0.22	0.17	0.91	0.02
IEJ01_11175	NP_465655.1	lmo2131	-	hypothetical protein lmo2131			0	2.53	0.7	0.05	0.059	0.47
IEJ01_06805	NP_464820.1	lmo1295	-	host factor-1 protein	Yes		0	2.51	0.189	0.17	0.879	-0.02
IEJ01_10425	NP_465512.1	lmo1988	leuB	3-isopropylmalate dehydrogenase			0	2.48	0.002	0.86	0	0.96
IEJ01_01435	NP_463805.1	lmo0274	-	hypothetical protein lmo0274			0	2.44	0.04	0.28	0	0.47
IEJ01_12575	NP_465909.1	lmo2386	-	hypothetical protein lmo2386	Yes		0	2.43	0.335	0.13	0.006	0.35
IEJ01_11390	NP_465698.1	lmo2174	-	hypothetical protein lmo2174			0	2.41	0.868	-0.03	0.589	-0.08
IEJ01_10420	NP_465511.1	lmo1987	leuA	2-isopropylmalate synthase			0	2.4	0.057	0.39	0	0.8
IEJ01_01695	NP_463856.1	lmo0326	-	transcriptional regulator			0.003	2.38	0.804	-0.01		0
IEJ01_00725	WP_015084540.1						0.002	2.38	0.027	0.13		1.88
IEJ01_13075	NP_466007.1	lmo2484	-	hypothetical protein lmo2484	Yes		0	2.36	0.311	-0.13	0.412	-0.12
IEJ01_08030	NP_465063.1	lmo1538	glpK	glycerol kinase	Yes		0	2.34	0.659	0.06	0.723	0.04
IEJ01_04805	NP_464468.1	lmo0943	fri	non-heme iron-binding ferritin	Yes		0	2.32	0	0.4	0.001	0.36
IEJ01_07210	NP_464900.1	lmo1375	-	aminotripeptidase	Yes		0	2.32	0.846	-0.03	0.951	0.01
IEJ01_12835	NP_465960.1	lmo2437	-	hypothetical protein lmo2437			0	2.31	0.142	0.22	0.005	0.41
IEJ01_09435	NP_465315.1	lmo1790	-	hypothetical protein lmo1790			0	2.3	0.583	0.09	0.743	0.05
IEJ01_02840	NP_464083.1	lmo0555	-	di-tripeptide transporter	Yes		0	2.29	0.988	0	0.741	-0.04
IEJ01_02685	NP_464052.1	lmo0524	-	sulfate transporter	Yes		0	2.27	0.619	0.07	0.363	0.1
IEJ01_08600	NP_465176.1	lmo1651	-	ABC transporter ATP-binding protein			0	2.26	0.229	0.16	0.705	-0.05
IEJ01_03315	NP_464176.1	lmo0649	-	transcriptional regulator			0	2.15	0.775	0.05	0.861	-0.03
IEJ01_09425	NP_465313.1	lmo1788	-	transcriptional regulator			0	2.15	0.992	0	0.933	-0.02
IEJ01_02230	NP_463963.1	lmo0434	inlB	internalin B	Yes		0	2.12	0.055	-0.28	0.63	-0.07
IEJ01_08675	NP_465191.1	lmo1666	-	peptidoglycan-linked protein			0	2.12	0.763	0.05	0.481	-0.09
IEJ01_02960	NP_464107.1	lmo0579	-	hypothetical protein lmo0579	Yes		0	2.1	0.285	0.14	0.189	0.17
IEJ01_02965	NP_464108.1	lmo0580	-	hypothetical protein lmo0580	Yes		0	2.07	0.559	0.08	0.417	0.09
IEJ01_10400	NP_465507.1	lmo1983	ilvD	dihydroxy-acid dehydratase			0	2.06	0.314	0.14	0.103	0.32
IEJ01_10415	NP_465510.1	lmo1986	ilvC	ketol-acid reductoisomerase			0	2.05	0.287	0.16	0.001	0.58
IEJ01_14050	NP_466192.1	lmo2670	-	hypothetical protein lmo2670			0	2.05	0.996	0	0.904	-0.02
IEJ01_10410	NP_465509.1	lmo1985	ilvH	acetolactate synthase small subunit			0	2.05	0.562	0.07	0.137	0.3
IEJ01_11475	NP_465715.1	lmo2191	spxA	ArsC family transcriptional regulator	Yes		0	2.02	0.721	0.06	0.917	-0.02
IEJ01_13145	NP_466021.1	lmo2498	-	phosphate ABC transporter permease			0	2.01	0.196	0.18	0.582	0.09
IEJ01_04725	NP_464453.1	lmo0928	-	3-methyladenine DNA glycosylase			0	1.97	0.841	0.04	0.02	0.33
IEJ01_10405	NP_465508.1	lmo1984	ilvB	acetolactate synthase			0	1.95	0.216	0.2	0.005	0.51
IEJ01_13135	NP_466019.1	lmo2496	-	phosphate ABC transporter ATP-binding protein			0	1.95	0.369	0.11	0.07	0.41
IEJ01_13210	NP_466034.1	lmo2511	-	hypothetical protein lmo2511	Yes		0	1.94	0.569	0.09	0.141	-0.2
IEJ01_03105	NP_464135.1	lmo0608	-	ABC transporter ATP-binding protein			0	1.94	0.868	-0.03	0.861	0.02
IEJ01_04545	NP_464422.1	lmo0896	rsbX	indirect negative regulation of sigma B dependant gene expression (serine phosphatase)	Yes		0	1.93	0	0.27	0	0.35
IEJ01_03280	NP_464169.1	lmo0642	-	hypothetical protein lmo0642	Yes		0	1.93	0.121	-0.2	0.127	-0.19
IEJ01_09030	NP_465238.1	lmo1713	-	rod shape-determining protein MreB			0	1.92	0.184	0.14	0.671	0.05
IEJ01_09430	NP_465314.1	lmo1789	-	hypothetical protein lmo1789			0	1.9	0.967	-0.01	0.967	-0.01
IEJ01_07030	NP_464865.1	lmo1340	-	hypothetical protein lmo1340	Yes		0	1.89	0.857	0.03	0.608	0.07
IEJ01_13140	NP_466020.1	lmo2497	-	phosphate ABC transporter permease			0	1.89	0.419	0.09	0.139	0.29
IEJ01_00195	NP_463572.1	lmo0039	-	carbamate kinase			0	1.88	0.939	0.02	0.89	-0.03
IEJ01_01810	NP_463881.1	lmo0351	-	phosphotransferase mannnose-specific family component IIA	Yes		0	1.88	0.658	-0.06	0.129	-0.3
IEJ01_09475	NP_465323.1	lmo1798	-	hypothetical protein lmo1798			0	1.87	0.717	0.06	0.167	0.26
IEJ01_01690	NP_463855.1	lmo0325	-	transcriptional regulator			0	1.86	0.769	-0.05	0.452	0.1
IEJ01_06795	NP_464818.1	lmo1293	glpD	glycerol-3-phosphate dehydrogenase	Yes		0	1.86	0.166	-0.2	0.079	-0.25
IEJ01_01525	NP_463823.1	lmo0292	-	heat-shock protein htrA serine protease	Yes		0	1.85	0.432	-0.08	0	-0.34
IEJ01_08595	NP_465175.1	lmo1650	-	hypothetical protein lmo1650			0	1.83	0.272	0.15	0.899	0.02
IEJ01_03320	NP_464177.1	lmo0650	-	hypothetical protein lmo0650			0	1.81	0.782	-0.04	0.198	-0.14
IEJ01_03090	NP_464132.1	lmo0605	-	hypothetical protein lmo0605			0	1.81	0.171	0.16	0.01	0.27
IEJ01_01520	NP_463822.1	lmo0291	-	hypothetical protein lmo0291	Yes		0	1.81	0.765	0.05	0.983	0
IEJ01_08585	NP_465173.1	lmo1648	-	hypothetical protein lmo1648			0	1.79	0.272	0.14	0	0.42
IEJ01_12645	NP_465922.1	lmo2399	-	hypothetical protein lmo2399	Yes		0	1.76	0.396	-0.11	0.959	-0.01
IEJ01_04610	NP_464430.1	lmo0904	-	hypothetical protein lmo0904			0	1.74	0.384	0.12	0.029	0.29
IEJ01_00990	NP_463731.1	lmo0200	prfA	listeriolysin positive regulatory protein			0	1.73	0.653	0.07	0.06	0.34
IEJ01_04540	NP_464421.1	lmo0895	sigB	RNA polymerase sigma factor SigB	Yes		0	1.68	0.113	0.14	0.001	0.27
IEJ01_03865	NP_464287.1	lmo0760	-	hypothetical protein lmo0760			0	1.68	0.013	-0.4	0.286	-0.16
IEJ01_14055	NP_466193.1	lmo2671	-	hypothetical protein lmo2671	Yes		0	1.67	0.956	-0.02	0.66	-0.08
IEJ01_00190	NP_463571.1	lmo0038	-	agmatine deiminase			0	1.67	0.916	-0.02	0.649	-0.08
IEJ01_13600	NP_466110.1	lmo2587	-	hypothetical protein lmo2587			0	1.67	0.004	0.37	0.085	0.22
IEJ01_13265	NP_466045.1	lmo2522	-	cell wall-binding protein			0	1.65	0.131	0.19	0.018	0.28
IEJ01_14475	NP_466263.1	lmo2741	-	multidrug transporter			0	1.64	0.911	0.02	0.547	-0.1
IEJ01_02115	NP_463940.1	lmo0411	-	phosphoenolpyruvate synthase			0	1.63	0.873	0.03	0.219	0.13
IEJ01_08605	NP_465177.1	lmo1652	-	ABC transporter ATP-binding protein			0	1.63	0.793	-0.04	0.242	-0.16
IEJ01_03100	NP_464134.1	lmo0607	-	ABC transporter ATP-binding protein			0	1.62	0.841	-0.03	0.996	0
IEJ01_09320	NP_465295.1	lmo1770	purL	phosphoribosylformylglycinamidine synthase I			0	1.61	0.96	-0.01	0.634	-0.08
IEJ01_02985	NP_464112.1	lmo0584	-	hypothetical protein lmo0584			0	1.61	0.72	0.05	0.904	-0.02
IEJ01_02590	NP_464033.1	lmo0505	-	ribulose-5-phosphate 3-epimerase			0	1.6	0.785	0.03	0.218	0.21
IEJ01_09825	NP_465393.1	lmo1868	-	hypothetical protein lmo1868			0	1.59	0.502	0.1	0.677	0.07
IEJ01_07495	NP_464957.1	lmo1432	-	hypothetical protein lmo1432	Yes		0	1.58	0.356	0.12	0.186	0.16
IEJ01_14465	NP_466261.1	lmo2739	-	NAD-dependent deacetylase			0	1.58	0.91	-0.02	0.179	-0.21
IEJ01_14435	NP_466255.1	lmo2733	-	PTS fructose transporter subunit IIABC			0	1.57	0.996	0	0.067	-0.32
IEJ01_04155	NP_464345.1	lmo0818	-	cation-transporting ATPase			0	1.56	0.796	-0.04	0.353	0.13
IEJ01_01755	NP_463870.1	lmo0340	-	hypothetical protein lmo0340	Yes		0	1.56	0.545	0.09	0.48	0.12
IEJ01_03860	NP_464286.1	lmo0759	-	hypothetical protein lmo0759			0	1.56	0.032	-0.28	0	-0.48
IEJ01_03800	NP_464274.1	lmo0747	-	hypothetical protein lmo0747			0.011	1.55	0.544	0.04		0.09
IEJ01_00185	NP_463570.1	lmo0037	-	amino acid transporter			0	1.55	0.96	-0.01	0.191	-0.24
IEJ01_04160	NP_464346.1	lmo0819	-	hypothetical protein lmo0819	Yes		0	1.55	0.972	-0.01	0.35	0.13
IEJ01_00460	NP_463625.1	lmo0092	-	ATP synthase F0F1 subunit beta			0	1.53	0.731	-0.04	0.901	-0.02
IEJ01_08455	NP_465147.1	lmo1622	-	hypothetical protein lmo1622			0	1.52	0	0.44	0.001	0.29
IEJ01_03870	NP_464288.1	lmo0761	-	hypothetical protein lmo0761			0	1.51	0.134	-0.25	0.341	-0.15
IEJ01_09300	NP_465291.1	lmo1766	purN	phosphoribosylglycinamide formyltransferase			0	1.5	0.58	0.09	0.975	-0.01
IEJ01_14470	NP_466262.1	lmo2740	-	hypothetical protein lmo2740			0	1.5	0.864	-0.02	0.803	-0.04
IEJ01_05695	NP_464664.1	lmo1139	-	hypothetical protein lmo1139			0	1.49	0.263	0.17	0	0.92
IEJ01_12490	NP_465892.1	lmo2369	-	general stress protein 13			0	1.49	0	0.57	0	0.64
IEJ01_04870	NP_464481.1	lmo0956	-	N-acetylglucosamine-6P-phosphate deacetylase	Yes		0	1.48	0	-0.4	0.026	-0.24
IEJ01_11185	NP_465657.1	lmo2133	-	fructose-1,6-biphosphate aldolase type II			0.009	1.48	0.761	-0.02	0.714	-0.04
IEJ01_09290	NP_465289.1	lmo1764	purD	phosphoribosylamine--glycine ligase			0	1.47	0.26	0.14	0.569	0.07
IEJ01_04395	YP_008475633.1	lmo0866a	-	hypothetical protein lmo0866a			0	1.45	0.061	0.21	0	0.47
IEJ01_09310	NP_465293.1	lmo1768	purF	amidophosphoribosyltransferase			0	1.45	0.731	-0.06	0.302	-0.15
IEJ01_01750	NP_463869.1	lmo0339	-	hypothetical protein lmo0339			0	1.43	0.994	0	0.937	0.01
IEJ01_05100	NP_464526.1	lmo1001	-	hypothetical protein lmo1001			0	1.43	0.067	0.29	0.028	0.34
IEJ01_02805	NP_464076.1	lmo0548	-	hypothetical protein lmo0548			0.001	1.43	0.974	-0.01	0.615	0.07
IEJ01_03455	NP_464204.1	lmo0677	fliQ	flagellar biosynthesis protein FliQ			0	1.43	0.035	-0.31	0	-0.58
IEJ01_01745	NP_463868.1	lmo0338	-	hypothetical protein lmo0338			0	1.42	0.3	0.16	0.268	0.19
IEJ01_10395	NP_465506.1	lmo1982	-	hypothetical protein lmo1982			0	1.42	0.056	0.31	0.217	0.19
IEJ01_13940	NP_466170.1	lmo2648	-	phosphotriesterase			0.008	1.42	0	3.29	0	3.33
IEJ01_14070	NP_466196.1	lmo2674	-	ribose-5-phosphate isomerase B	Yes		0	1.42	0.013	0.35	0.434	0.11
IEJ01_03725	NP_464259.1	lmo0732	-	peptidoglycan binding protein			0	1.41	0.634	-0.08	0.171	0.21
IEJ01_02240	NP_463965.1	lmo0436	-	hypothetical protein lmo0436			0	1.4	0.407	0.13	0.533	0.1
IEJ01_04530	NP_464419.1	lmo0893	rsbV	anti-anti-sigma factor (antagonist of RsbW)	Yes		0	1.39	0.648	-0.06	0.091	0.17
IEJ01_02095	NP_463936.1	lmo0406	-	hypothetical protein lmo0406	Yes		0	1.38	0.989	0	0.412	-0.13
IEJ01_00130	NP_463559.1	lmo0026	-	copper homeostasis protein CutC			0.008	1.38	0.745	0.03	0.959	-0.01
IEJ01_10950	NP_465616.1	lmo2092	betL	glycine betaine transporter BetL			0	1.35	0.188	0.12	0.057	0.16
IEJ01_04020	NP_464318.1	lmo0791	-	hypothetical protein lmo0791			0	1.35	0	0.46	0.189	0.12
IEJ01_07240	NP_464906.1	lmo1381	-	acylphosphatase			0	1.35	0.003	0.32	0.006	0.29
IEJ01_12075	WP_014601510.1			hypothetical protein			0.032	1.35	0.733	0.02		-0.07
IEJ01_09315	NP_465294.1	lmo1769	purQ	phosphoribosylformylglycinamidine synthase II			0	1.35	0.487	-0.11	0.02	-0.35
IEJ01_05900	NP_464705.1	lmo1180	-	carboxysome structural protein			0.012	1.34	0.929	0.01	0.654	0.05
IEJ01_12275	NP_465867.1	lmo2344	-	hypothetical protein lmo2344			0	1.33	0.223	0.18	0.289	0.16
IEJ01_04240	NP_464363.1	lmo0836	-	phosphate-starvation-inducible protein PsiE			0	1.33	0.001	0.44	0	0.46
IEJ01_10330	NP_465493.1	lmo1969	-	2-keto-3-deoxygluconate-6-phosphate aldolase			0.004	1.33	0.572	0.05	0.788	-0.03
IEJ01_02595	NP_464034.1	lmo0506	-	sorbitol dehydrogenase			0	1.32	0.002	0.66	0	0.83
IEJ01_00500	NP_463633.1	lmo0100	-	hypothetical protein lmo0100	Yes		0	1.32	0.001	0.48	0	0.66
IEJ01_03875	NP_464289.1	lmo0762	-	ATP/GTP-binding protein			0	1.32	0.047	0.22	0.005	0.3
IEJ01_09295	NP_465290.1	lmo1765	purH	bifunctional phosphoribosylaminoimidazolecarboxamide formyltransferase/IMP cyclohydrolase			0	1.32	0.22	0.18	0.902	0.02
IEJ01_12885	NP_465969.1	lmo2446	-	glycosidase			0.002	1.31	0.338	0.09	0.01	1.02
IEJ01_09305	NP_465292.1	lmo1767	purM	phosphoribosylaminoimidazole synthetase			0	1.31	0.89	-0.03	0.115	-0.24
IEJ01_03000	NP_464115.1	lmo0587	-	secreted protein			0	1.29	0.316	-0.15	0.449	-0.13
IEJ01_12880	NP_465968.1	lmo2445	-	internalin			0.022	1.29	0.498	0.05		0
IEJ01_03095	NP_464133.1	lmo0606	-	MarR family transcriptional regulator			0	1.29	0.873	0.03	0.48	0.1
IEJ01_09880	NP_465404.1	lmo1880	-	RNase HI			0	1.28	0	0.4	0	0.44
IEJ01_09330	NP_465297.1	lmo1772	purC	phosphoribosylaminoimidazole-succinocarboxamide synthase			0	1.27	0.549	-0.09	0.179	-0.25
IEJ01_14445	NP_466257.1	lmo2735	-	sucrose phosphorylase			0	1.27	0.891	-0.03	0.723	-0.06
IEJ01_13935	NP_466169.1	lmo2647	-	creatinine amidohydrolase			0.066	1.27	0.001	3.15	0.001	2.85
IEJ01_04535	NP_464420.1	lmo0894	rsbW	serine-protein kinase RsbW	Yes		0	1.26	0.794	0.04	0.058	0.17
IEJ01_12270	NP_465866.1	lmo2343	-	nitrilotriacetate monooxygenase			0	1.24	0.384	0.11	0.427	0.1
IEJ01_12485	NP_465891.1	lmo2368	-	hypothetical protein lmo2368			0	1.24	0.514	0.08	0.513	0.08
IEJ01_10805	NP_465588.1	lmo2064	mscL	large-conductance mechanosensitive channel protein	Yes		0	1.23	0	0.97	0	0.63
IEJ01_02885	NP_464092.1	lmo0564	hisA	1-(5-phosphoribosyl)-5			0	1.22	0.983	0.01	0.949	-0.01
IEJ01_02810	NP_464077.1	lmo0549	-	internalin			0	1.22	0.633	-0.06	0.796	0.04
IEJ01_11990	NP_465821.1	lmo2297	-	scaffolding protein			0	1.2	0.273	0.17	0	-1.51
IEJ01_09830	NP_465394.1	lmo1869	-	hypothetical protein lmo1869			0	1.2	0.506	-0.1	0.005	-0.47
IEJ01_07205	WP_003722501.1		prli42				0	1.18	0	1.12	0	1.27
IEJ01_13480	NP_466087.1	lmo2564	-	4-oxalocrotonate isomerase			0	1.18	0.21	0.16	0.013	0.3
IEJ01_10965	NP_465619.1	lmo2095	-	phosphofructokinase	Yes		0	1.18	0	0.49	0	0.37
IEJ01_00450	NP_463623.1	lmo0090	-	ATP synthase F0F1 subunit alpha			0	1.17	0.779	0.04	0.873	0.03
IEJ01_01580	NP_463834.1	lmo0303	-	putaive secreted, lysin rich protein			0	1.17	0	0.58	0.048	0.25
IEJ01_06545	NP_464770.1	lmo1245	-	hypothetical protein lmo1245			0	1.16	0.967	0.01	0	0.66
IEJ01_08235	NP_465104.1	lmo1579	-	alanine dehydrogenase			0	1.16	0.183	0.14	0.821	0.03
IEJ01_14165	NP_466203.1	lmo2681	kdpB	potassium-transporting ATPase subunit B			0.01	1.16	0.761	-0.03	0.873	-0.02
IEJ01_02820	NP_464079.1	lmo0551	-	hypothetical protein lmo0551	Yes		0	1.16	0.382	0.12	0.258	0.16
IEJ01_04265	NP_464367.1	lmo0841	-	calcium-transporting ATPase			0	1.15	0.01	0.25	0.525	0.07
IEJ01_10390	NP_465505.1	lmo1981	-	hypothetical protein lmo1981			0	1.15	0.361	0.14	0.031	0.38
IEJ01_05925	NP_464710.1	lmo1185	-	PduT protein			0.033	1.15	0.592	0.04	0.263	0.12
IEJ01_14660	NP_466298.1	lmo2776	-	hypothetical protein lmo2776			0.03	1.14	0.435	0.06	0.456	0.08
IEJ01_09690	NP_465366.1	lmo1841	-	hypothetical protein lmo1841			0	1.14	0.308	0.15	0.162	0.22
IEJ01_00455	NP_463624.1	lmo0091	-	ATP synthase subunit gamma			0.001	1.14	0.831	-0.03	0.778	-0.04
IEJ01_12280	NP_465868.1	lmo2345	-	hypothetical protein lmo2345			0	1.13	0.696	0.06	0.735	-0.05
IEJ01_02935	NP_464102.1	lmo0574	-	beta-glucosidase			0	1.13	0	0.45	0	0.49
IEJ01_12300	NP_465872.1	lmo2349	-	amino acid ABC transporter substrate-binding protein			0	1.13	0.235	0.15	0.638	-0.07
IEJ01_12345	NP_465881.1	lmo2358	-	N-acetylglucosamine-6-phosphate isomerase			0	1.12	0.99	0	0	-0.38
IEJ01_06410	WP_009917707.1						0	1.12	0.001	0.44	0	0.69
IEJ01_02900	NP_464095.1	lmo0567	hisD	histidinol dehydrogenase			0	1.12	0.338	0.15	0.731	0.06
IEJ01_07080	NP_464875.1	lmo1350	-	glycine dehydrogenase subunit 2			0	1.12	0.003	0.34	0.004	0.32
IEJ01_13355	NP_466062.1	lmo2539	glyA	serine hydroxymethyltransferase			0	1.1	0.967	0.01	0.434	0.1
IEJ01_15020	NP_466369.1	lmo2847	-	rhamnulose-1-phosphate aldolase			0.032	1.09	0.791	0.02	0.812	-0.03
IEJ01_11055	NP_465636.1	lmo2112	-	hypothetical protein lmo2112			0	1.09	0.117	0.21	0.104	0.21
IEJ01_05435	NP_464593.1	lmo1068	-	hypothetical protein lmo1068	Yes		0	1.09	0.042	0.28	0.014	0.34
IEJ01_03945	NP_464303.1	lmo0776	-	transcriptional regulator			0	1.09	0.974	-0.01	0.495	-0.12
IEJ01_08375	NP_465131.1	lmo1606	-	DNA translocase	Yes		0	1.08	0.653	0.05	0.97	0
IEJ01_10445	NP_465516.1	lmo1992	-	alpha-acetolactate decarboxylase			0	1.08	0	0.51	0	0.42
IEJ01_04310	NP_464376.1	lmo0850	-	hypothetical protein lmo0850			0	1.08	0.005	0.46	0.041	0.32
IEJ01_03180	NP_464150.1	lmo0623	-	hypothetical protein lmo0623			0	1.07	0.388	0.13	0.649	0.08
IEJ01_15035	NP_466372.1	lmo2850	-	sugar transporter			0.141	1.07		0		0.01
IEJ01_02485	NP_464012.1	lmo0484	-	heme-degrading monooxygenase IsdG			0	1.06	0.988	0.01	0.913	-0.02
IEJ01_03795	NP_464273.1	lmo0746	-	hypothetical protein lmo0746			0.056	1.06	0.932	-0.01		0.06
IEJ01_11955	NP_465814.1	lmo2290	-	protein gp13			0	1.06	0.996	0	0	-1.58
IEJ01_14440	NP_466256.1	lmo2734	-	sugar hydrolase	Yes		0	1.06	0.643	-0.07	0.596	-0.08
IEJ01_09350	NP_465301.1	lmo1776	-	hypothetical protein lmo1776			0	1.06	0.758	0.05	0.977	0.01
IEJ01_02815	NP_464078.1	lmo0550	-	pepdidoglycan-bound protein			0.012	1.06	0.905	-0.01	0.993	0
IEJ01_15070	NP_466379.1	lmo2857	-	hypothetical protein lmo2857			0	1.05	0.226	0.16	0.089	0.21
IEJ01_15005	NP_466366.1	lmo2844	-	hypothetical protein lmo2844			0	1.05	0.22	0.16	0.99	0
IEJ01_02480	NP_464011.1	lmo0483	-	hypothetical protein lmo0483			0	1.05	0.042	0.29	0.333	0.14
IEJ01_06590	WP_014092656.1			hypothetical protein			0	1.05	0.146	0.15	0.02	0.22
IEJ01_05345	NP_464575.1	lmo1050	-	hypothetical protein lmo1050			0	1.05	0.199	0.2	0.346	0.15
IEJ01_01845	NP_463888.1	lmo0358	-	PTS fructose transporter subunit IIBC			0	1.05	0.807	-0.03	0.493	0.11
IEJ01_12285	NP_465869.1	lmo2346	-	amino acid ABC transporter ATP-binding protein			0	1.04	0.865	0.03	0.873	-0.03
IEJ01_09445	NP_465317.1	lmo1792	trmD	tRNA (guanine-N(1)-)-methyltransferase			0	1.04	0.933	-0.02	0.42	-0.09
IEJ01_02330	NP_463982.1	lmo0453	-	hypothetical protein lmo0453			0	1.03	0.044	0.26	0.146	0.18
IEJ01_09325	NP_465296.1	lmo1771	-	phosphoribosylformylglycinamidine synthase subunit PurS			0.002	1.03	0.542	-0.07	0.139	-0.28
IEJ01_03325	NP_464178.1	lmo0651	-	transcriptional regulator			0	1.03	0.866	-0.03	0.464	0.07
IEJ01_11985	NP_465820.1	lmo2296	-	phage coat protein			0	1.03	0.655	0.07	0	-1.66
IEJ01_13590	NP_466108.1	lmo2585	-	hypothetical protein lmo2585			0.064	1.02	0.962	0.01	0.29	-0.1
IEJ01_07070	NP_464873.1	lmo1348	gcvT	glycine cleavage system aminomethyltransferase T			0	1.02	0.163	0.2	0.2	0.19
IEJ01_10335	NP_465494.1	lmo1970	-	phosphotriesterase			0.044	1.02	0.37	-0.06	0.548	-0.07
IEJ01_03740	NP_464262.1	lmo0735	-	ribulose-5-phosphate 3-epimerase			0.003	1.02	0.403	0.1	0.364	0.15
IEJ01_03790	NP_464272.1	lmo0745	-	hypothetical protein lmo0745			0.005	1.01	0.61	0.06	0.562	0.09
IEJ01_02880	NP_464091.1	lmo0563	hisF	imidazole glycerol phosphate synthase subunit HisF			0	1.01	0.996	0	0.541	0.1
IEJ01_01760	NP_463871.1	lmo0341	-	hypothetical protein lmo0341			0	1.01	0.001	0.49	0.005	0.41
IEJ01_08985	NP_465229.1	lmo1704	-	hypothetical protein lmo1704			0	1	0.664	0.07	0.327	0.14
IEJ01_07075	NP_464874.1	lmo1349	-	glycine dehydrogenase subunit 1			0	0.99	0.124	0.21	0.228	0.16
IEJ01_02335	NP_463983.1	lmo0454	-	hypothetical protein lmo0454			0	0.99	0.435	0.09	0.586	0.06
IEJ01_02110	NP_463939.1	lmo0409	-	internalin			0	0.99	0.262	-0.16	0.943	0.01
IEJ01_06540	NP_464769.1	lmo1244	-	phosphoglycerate mutase			0	0.99	0.014	0.28	0.076	0.2
IEJ01_01575	NP_463833.1	lmo0302	-	hypothetical protein lmo0302			0	0.99	0.061	0.37	0.503	0.11
IEJ01_04165	NP_464347.1	lmo0820	-	acetyltransferase			0	0.99	0.345	0.11	0.009	0.27
IEJ01_08185	NP_465094.1	lmo1569	fxsA	FxsA			0	0.98	0.066	0.22	0	0.78
IEJ01_09000	NP_465232.1	lmo1707	-	hypothetical protein lmo1707			0	0.98	0.005	0.38	0	0.84
IEJ01_02895	NP_464094.1	lmo0566	hisB	imidazoleglycerol-phosphate dehydratase			0.003	0.97	0.793	0.04	0.843	0.03
IEJ01_03025	NP_464120.1	lmo0592	-	hypothetical protein lmo0592			0	0.97	0.062	-0.22	0	-0.86
IEJ01_02150	NP_463947.1	lmo0418	-	hypothetical protein lmo0418			0	0.97	0.242	0.19	0.064	0.34
IEJ01_00445	NP_463622.1	lmo0089	-	ATP synthase subunit delta			0.026	0.97	0.98	0	0.931	0.01
IEJ01_12290	NP_465870.1	lmo2347	-	amino acid ABC transporter permease			0	0.96	0.882	0.03	0.913	-0.02
IEJ01_12305	NP_465873.1	lmo2350	-	hypothetical protein lmo2350			0	0.95	0.083	0.26	0.809	0.04
IEJ01_02380	NP_463992.1	lmo0463	-	hypothetical protein lmo0463			0.001	0.95	0.444	0.1	0.116	0.33
IEJ01_11960	NP_465815.1	lmo2291	-	major tail shaft protein			0	0.95	0.526	-0.1	0	-2.13
IEJ01_02825	NP_464080.1	lmo0552	-	hypothetical protein lmo0552			0	0.95	0.736	0.06	0.118	0.27
IEJ01_08735	NP_465203.1	lmo1678	-	bifunctional homocysteine S-methyltransferase/5,10-methylenetetrahydrofolate reductase			0	0.95	0.364	-0.14	0.444	-0.13
IEJ01_02875	NP_464090.1	lmo0562	hisI	phosphoribosyl-AMP cyclohydrolase			0.002	0.93	0.779	-0.04	0.957	0.01
IEJ01_04410	NP_464395.1	lmo0869	-	hypothetical protein lmo0869	Yes		0	0.93	0.935	-0.02	0.094	0.26
IEJ01_02325	NP_463981.1	lmo0452	-	hypothetical protein lmo0452			0	0.93	0.013	0.24	0.018	0.23
IEJ01_08520	NP_465160.1	lmo1635	-	hypothetical protein lmo1635			0	0.93	0.227	0.13	0.625	0.05
IEJ01_14965	NP_466358.1	lmo2836	-	alcohol dehydrogenase	Yes		0.027	0.93	0.21	0.12	0.228	0.18
IEJ01_08230	NP_465103.1	lmo1578	-	X-Pro dipeptidase			0	0.92	0.989	0	0.003	-0.26
IEJ01_14655	NP_466297.1	lmo2775	-	bacteriocin transporter			0	0.92	0.705	-0.05	0.99	0
IEJ01_07810	NP_465020.1	lmo1495	-	hypothetical protein lmo1495			0	0.92	0.636	0.07	0.298	0.13
IEJ01_02910	NP_464097.1	lmo0569	hisZ	ATP phosphoribosyltransferase			0	0.92	0.22	0.19	0.582	0.09
IEJ01_14375	NP_466243.1	lmo2721	-	6-phosphogluconolactonase			0	0.92	0.452	-0.12	0.393	-0.14
IEJ01_05445	NP_464595.1	lmo1070	-	hypothetical protein lmo1070			0	0.91	0	0.73	0	0.74
IEJ01_04730	NP_464454.1	lmo0929	-	sortase			0	0.91	0.433	0.07	0	0.34
IEJ01_04910	NP_464489.1	lmo0964	-	hypothetical protein lmo0964			0	0.91	0.818	0.04	0.42	0.09
IEJ01_05410	NP_464588.1	lmo1063	-	ABC transporter ATP binding protein			0.034	0.91	0.477	0.07	0.462	0.1
IEJ01_07270	NP_464912.1	lmo1387	-	pyrroline-5-carboxylate reductase			0	0.9	0.453	0.11	0.215	0.18
IEJ01_13115	NP_466015.1	lmo2492	-	hypothetical protein lmo2492			0	0.9	0.666	0.07	0.004	0.39
IEJ01_08740	NP_465204.1	lmo1679	-	cystathionine beta-lyase			0.094	0.9	0.823	-0.02		-0.09
IEJ01_04250	NP_464364.1	lmo0838	uhpT	sugar:phosphate antiporter			0.01	0.9	0.722	0.04	0.796	0.04
IEJ01_12295	NP_465871.1	lmo2348	-	amino acid ABC transporter permease			0	0.9	0.733	0.06	0.346	-0.13
IEJ01_01790	NP_463877.1	lmo0347	-	dihydroxyacetone kinase			0.029	0.9	0.698	-0.04	0.4	-0.11
IEJ01_04875	NP_464482.1	lmo0957	-	glucosamine-6-phosphate isomerase	Yes		0	0.89	0	-0.31	0.014	-0.21
IEJ01_03755	NP_464265.1	lmo0738	-	PTS beta-glucoside transporter subunit IIABC	Yes		0	0.89	0.988	0.01	0.252	0.2
IEJ01_02470	NP_464009.1	lmo0481	-	hypothetical protein lmo0481			0	0.89	0.764	0.05	0.317	0.14
IEJ01_09835	NP_465395.1	lmo1870	-	alkaline phosphatase			0	0.89	0.261	-0.16	0.185	0.19
IEJ01_01375	NP_463793.1	lmo0262	inlG	internalin G			0	0.88	0.355	0.14	0.042	0.4
IEJ01_10325	NP_465492.1	lmo1968	-	creatinine amidohydrolase			0.005	0.88	0.967	0.01	0.682	-0.07
IEJ01_15025	NP_466370.1	lmo2848	-	L-rhamnose isomerase			0.115	0.88	0.299	-0.06		-0.06
IEJ01_12590	NP_465912.1	lmo2389	-	NADH dehydrogenase	Yes		0	0.88	0.791	-0.04	0.151	-0.15
IEJ01_01225	NP_463763.1	lmo0232	clpC	endopeptidase Clp ATP-binding chain C	Yes		0	0.88	0.403	-0.1	0.993	0
IEJ01_04920	NP_464491.1	lmo0966	-	hypothetical protein lmo0966			0	0.88	0.213	0.16	0.291	0.13
IEJ01_08950	NP_465222.1	lmo1697	-	hypothetical protein lmo1697			0	0.88	0.1	0.17	0	0.4
IEJ01_10970	NP_465620.1	lmo2096	-	PTS galacticol transporter subunit IIC			0	0.88	0.866	0.03	0.496	0.11
IEJ01_01780	NP_463875.1	lmo0345	-	sugar-phosphate isomerase			0.05	0.88	0.727	0.03	0.306	-0.12
IEJ01_12340	NP_465880.1	lmo2357	-	hypothetical protein lmo2357			0	0.87	0.943	0.02	0.052	-0.23
IEJ01_12650	NP_465923.1	lmo2400	-	acetyltransferase			0	0.87	0.454	-0.11	0.902	-0.02
IEJ01_02100	NP_463937.1	lmo0407	-	hypothetical protein lmo0407	Yes		0	0.87	0.566	-0.08	0.71	0.05
IEJ01_13580	NP_466106.1	lmo2583	-	DNA-binding response regulator			0	0.87	0.396	0.13	0.144	0.27
IEJ01_14950	NP_466355.1	lmo2833	-	maltose phosphorylase			0.029	0.87	0.765	0.03	0.566	0.08
IEJ01_09130	NP_465257.1	lmo1732	-	sugar ABC transporter permease			0	0.87	0.744	0.05	0.158	-0.26
IEJ01_14215	YP_008475645.1	lmo2689a	-	hypothetical protein lmo2689a			0	0.86	0	0.49	0.001	0.42
IEJ01_09115	NP_465254.1	lmo1729	-	beta-glucosidase			0	0.86	0.07	0.38	0.16	-0.27
IEJ01_00530	NP_463639.1	lmo0106	-	transcriptional regulator			0	0.86	0.003	0.48	0.228	0.18
IEJ01_06790	NP_464817.1	lmo1292	-	glycerophosphodiester phosphodiesterase			0	0.86	0.545	0.09	0.02	0.32
IEJ01_11945	NP_465812.1	lmo2288	-	protein gp15			0	0.86	0.878	-0.03	0	-1.46
IEJ01_01770	NP_463873.1	lmo0343	-	translaldolase			0.017	0.86	0.781	0.03	0.957	-0.01
IEJ01_02105	NP_463938.1	lmo0408	-	hypothetical protein lmo0408	Yes		0	0.85	0.907	0.02	0.578	0.06
IEJ01_05810	NP_464687.1	lmo1162	-	hypothetical protein lmo1162	Yes		0.199	0.85		0.03		0.03
IEJ01_10770	NP_465581.1	lmo2057	ctaB	protoheme IX farnesyltransferase			0	0.85	0.941	0.02	0.83	0.03
IEJ01_04880	NP_464483.1	lmo0958	-	GntR family transcirptional regulator	Yes		0	0.85	0.036	-0.19	0.027	-0.19
IEJ01_02870	NP_464089.1	lmo0561	hisE	phosphoribosyl-ATP pyrophosphatase			0.001	0.85	0.359	-0.12	0.493	-0.12
IEJ01_04170	NP_464348.1	lmo0821	-	hypothetical protein lmo0821	Yes		0	0.85	0.9	-0.02	0.381	0.1
IEJ01_14370	NP_466242.1	lmo2720	-	acetate-CoA ligase			0	0.85	0.403	0.13	0.18	0.2
IEJ01_03005	NP_464116.1	lmo0588	-	DNA photolyase			0	0.85	0.188	-0.17	0.638	-0.07
IEJ01_13015	NP_465995.1	lmo2472	-	hypothetical protein lmo2472			0	0.85	0.766	-0.04	0.029	-0.19
IEJ01_11965	NP_465816.1	lmo2292	-	protein gp11			0	0.85	0.26	-0.17	0	-1.93
IEJ01_06575	NP_464776.1	lmo1251	-	Fnr/Crp family transcriptional regulator			0	0.84	0.028	0.31	0.001	0.46
IEJ01_02490	NP_464013.1	lmo0485	-	hypothetical protein lmo0485			0	0.84	0.021	-0.19	0.001	-0.26
IEJ01_03040	NP_464123.1	lmo0595	-	O-acetylhomoserine sulfhydrylase			0	0.84	0.967	-0.01	0.506	0.1
IEJ01_02495	NP_464014.1	lmo0486	rpmF	50S ribosomal protein L32			0	0.84	0	0.36	0	0.33
IEJ01_01365	NP_463791.1	lmo0260	-	hypothetical protein lmo0260			0	0.84	0.727	0.06	0.734	-0.05
IEJ01_14415	NP_466251.1	lmo2729	-	hypothetical protein lmo2729			0	0.84	0.001	0.41	0	0.6
IEJ01_02700	NP_464055.1	lmo0527	-	transmembrane protein			0	0.84	0.163	0.16	0.001	0.35
IEJ01_14815	NP_466328.1	lmo2806	-	hypothetical protein lmo2806			0.065	0.84	0.737	0.03	0.112	-0.21
IEJ01_07530	NP_464964.1	lmo1439	sod	superoxide dismutase	Yes		0	0.84	0.791	-0.03	0.471	0.07
IEJ01_03750	NP_464264.1	lmo0737	-	hypothetical protein lmo0737			0.015	0.83	0.502	-0.07	0.707	0.06
IEJ01_12310	NP_465874.1	lmo2351	-	FMN reductase			0	0.82	0.139	0.21	0.738	0.05
IEJ01_05300	NP_464566.1	lmo1041	-	molybdate ABC transporter substrate-binding protein			0	0.82	0.042	0.34	0.989	0
IEJ01_04125	NP_464339.1	lmo0812	-	hypothetical protein lmo0812			0	0.82	0.727	0.06	0.416	0.12
IEJ01_13010	NP_465994.1	lmo2471	-	NADPH dehydrogenase			0	0.82	0.929	0.02	0.353	-0.08
IEJ01_01740	NP_463867.1	lmo0337	-	hypothetical protein lmo0337			0	0.82	0.59	0.09	0.665	-0.07
IEJ01_03720	NP_464258.1	lmo0731	-	hypothetical protein lmo0731			0	0.82	0	0.87	0	0.85
IEJ01_09340	NP_465299.1	lmo1774	purK	phosphoribosylaminoimidazole carboxylase ATPase subunit			0	0.82	0.309	0.15	0.199	-0.19
IEJ01_00435	NP_463620.1	lmo0087	-	hypothetical protein lmo0087			0.008	0.82	0.749	-0.04	0.291	0.18
IEJ01_09370	NP_465302.1	lmo1777	-	hypothetical protein lmo1777			0	0.82	0.969	0.01	0.371	0.15
IEJ01_11360	NP_465692.1	lmo2168	-	glyoxalase			0	0.82	0.007	0.24	0	0.35
IEJ01_03275	NP_464168.1	lmo0641	-	heavy metal-transporting ATPase			0	0.81	0.001	0.73	0	0.8
IEJ01_10565	NP_465540.1	lmo2016	cspB	cold-shock protein			0	0.81	0.178	0.17	0.916	-0.02
IEJ01_14905	NP_466346.1	lmo2824	-	D-3-phosphoglycerate dehydrogenase			0	0.81	0.694	0.06	0.333	0.11
IEJ01_04785	NP_464464.1	lmo0939	-	hypothetical protein lmo0939			0	0.81	0.326	0.14	0.179	0.19
IEJ01_00065	NP_463546.1	lmo0013	qoxA	AA3-600 quinol oxidase subunit II	Yes		0.009	0.81	0.766	-0.04	0.904	-0.02
IEJ01_03175	NP_464149.1	lmo0622	-	hypothetical protein lmo0622			0	0.81	0.719	0.06	0.566	-0.1
IEJ01_04120	NP_464338.1	lmo0811	-	carbonic anhydrase			0.002	0.81	0.781	0.05	0.309	0.18
IEJ01_01775	NP_463874.1	lmo0344	-	short chain dehydrogenase			0.053	0.8	0.68	-0.04	0.83	-0.03
IEJ01_10640	NP_465555.1	lmo2031	-	hypothetical protein lmo2031	Yes		0	0.8	0.601	0.06	0.904	-0.01
IEJ01_03035	NP_464122.1	lmo0594	metX	homoserine O-acetyltransferase			0	0.8	0.97	-0.01	0.64	0.08
IEJ01_11535	NP_465727.1	lmo2203	-	N-acetylmuramoyl-L-alanine amidase			0.001	0.8	0.98	-0.01	0.438	0.13
IEJ01_09110	NP_465253.1	lmo1728	-	cellobiose phosphorylase			0	0.8	0.952	-0.01	0.193	-0.2
IEJ01_03745	NP_464263.1	lmo0736	-	ribose-5-phosphate isomerase B			0.164	0.8	0.875	0.01	0.931	0.01
IEJ01_10150	NP_465457.1	lmo1933	folE	GTP cyclohydrolase I	Yes		0	0.8	0.033	-0.24	0.006	-0.3
IEJ01_01860	YP_008475627.1	lmo0360a	-	hypothetical protein lmo0360a			0	0.79	0.182	0.2	0.018	0.36
IEJ01_03335	NP_464180.1	lmo0653	-	hypothetical protein lmo0653			0	0.79	0.721	0.04	0.298	-0.09
IEJ01_01855	NP_463890.1	lmo0360	-	DeoR family transcriptional regulator	Yes		0	0.79	0.155	0.17	0.003	0.32
IEJ01_12250	NP_465862.1	lmo2339	-	hypothetical protein lmo2339			0	0.79	0.106	0.19	0.066	0.21
IEJ01_02905	NP_464096.1	lmo0568	hisG	ATP phosphoribosyltransferase			0.001	0.78	0.508	-0.09	0.876	-0.03
IEJ01_02050	NP_463927.1	lmo0397	-	hypothetical protein lmo0397			0	0.78	0.932	-0.02	0.959	0.01
IEJ01_03855	NP_464285.1	lmo0758	-	hypothetical protein lmo0758			0	0.78	0.007	-0.4	0.03	-0.31
IEJ01_12135	NP_465845.1	lmo2321	-	hypothetical protein lmo2321			0	0.78	0.324	0.15	0.756	0.05
IEJ01_06020	NP_464729.2	lmo1204	-	cobalamin biosynthesis protein CbiM			0.086	0.77	0.983	0	0.725	0.05
IEJ01_11365	NP_465693.1	lmo2169	-	hypothetical protein lmo2169			0	0.77	0.14	0.16	0.006	0.27
IEJ01_03845	NP_464283.1	lmo0756	-	ABC transporter ATP-binding protein			0	0.77	0.255	0.18	0.444	0.13
IEJ01_11795	NP_465779.1	lmo2255	-	hypothetical protein lmo2255			0	0.77	0.035	0.31	0.002	0.44
IEJ01_14645	WP_015455372.1			bacteriocin-like WGxF protein			0.061	0.77	0.886	0.02	0.954	0.01
IEJ01_11375	NP_465695.1	lmo2171	-	MFS transporter			0.097	0.77	0.643	0.04	0.774	0.04
IEJ01_12125	NP_465843.1	lmo2319	-	hypothetical protein lmo2319			0.016	0.76	0.861	0.03	0.007	-0.9
IEJ01_08925	NP_465217.1	lmo1692	-	hypothetical protein lmo1692			0	0.76	0.369	0.13	0.18	0.19
IEJ01_00080	NP_463549.1	lmo0016	qoxD	quinol oxidase aa3-600 subunit IV			0	0.76	0.197	0.16	0.076	0.21
IEJ01_13530	NP_466097.1	lmo2574	-	hypothetical protein lmo2574			0	0.76	0.12	0.21	0.02	0.29
IEJ01_11970	NP_465817.1	lmo2293	-	protein gp10			0.004	0.76	0.736	-0.05	0	-1.59
IEJ01_03835	NP_464281.1	lmo0754	-	hypothetical protein lmo0754			0.001	0.76	0.713	0.06	0.958	-0.01
IEJ01_05885	NP_464702.1	lmo1177	-	carboxysome structural protein EutL			0.142	0.76	0.808	0.02	0.62	0.06
IEJ01_09870	NP_465402.1	lmo1878	-	manganese transport transcriptional regulator			0	0.75	0.084	0.23	0.831	-0.03
IEJ01_07805	NP_465019.1	lmo1494	-	5\'-methylthioadenosine/S-adenosylhomocysteine nucleosidase			0	0.75	0.876	-0.03	0.693	0.04
IEJ01_02990	NP_464113.1	lmo0585	-	secreted protein			0.001	0.75	0.866	0.03	0.996	0
IEJ01_07010	NP_464861.1	lmo1336	-	5-formyltetrahydrofolate cyclo-ligase			0	0.75	0.698	0.05	0.158	0.16
IEJ01_14825	NP_466330.1	lmo2808	-	hypothetical protein lmo2808			0.269	0.75		0.05		0.02
IEJ01_14195	NP_466208.1	lmo2686	-	hypothetical protein lmo2686			0	0.74	0.042	0.36	0.052	0.33
IEJ01_03850	NP_464284.1	lmo0757	-	hypothetical protein lmo0757			0	0.73	0.952	0.01	0.686	0.05
IEJ01_02360	NP_463988.1	lmo0459	-	transcriptional regulator			0	0.73	0.587	0.08	0.024	0.25
IEJ01_11910	NP_465806.1	lmo2282	-	protein gp21			0.037	0.73	0.559	-0.06	0.001	-1.35
IEJ01_11950	NP_465813.1	lmo2289	-	protein gp14			0.002	0.73	0.998	0	0	-1.94
IEJ01_13040	NP_466000.1	lmo2477	galE	UDP-glucose 4-epimerase	Yes		0	0.73	0.621	0.08	0.902	0.02
IEJ01_00070	NP_463547.1	lmo0014	qoxB	AA3-600 quinol oxidase subunit I	Yes		0	0.73	0.996	0.01	0.68	0.07
IEJ01_11895	WP_014601425.1						0.101	0.73	0.957	-0.01	0.024	-1.03
IEJ01_00510	NP_463635.1	lmo0102	-	hypothetical protein lmo0102			0	0.73	0.452	-0.12	0.8	-0.04
IEJ01_07915	NP_465040.1	lmo1515	-	hypothetical protein lmo1515			0	0.73	0.046	0.26	0.008	0.34
IEJ01_01795	NP_463878.1	lmo0348	-	dihydroxyacetone kinase			0.021	0.72	0.472	-0.08	0.02	-0.71
IEJ01_04780	NP_464463.1	lmo0938	-	protein-tyrosine-phosphatase			0	0.72	0.395	0.11	0.77	-0.04
IEJ01_08745	NP_465205.1	lmo1680	-	cystathionine gamma-synthase			0.141	0.72	0.873	0.02	0.67	-0.05
IEJ01_11915	NP_465807.1	lmo2283	-	protein gp20			0.006	0.71	0.745	-0.05	0	-1.42
IEJ01_01900	NP_463898.1	lmo0368	-	hypothetical protein lmo0368			0	0.71	0.426	0.11	0.916	0.02
IEJ01_06135	NP_464752.1	lmo1227	-	uracil-DNA glycosylase			0	0.71	0.005	0.3	0.011	0.27
IEJ01_02385	NP_463993.1	lmo0464	-	transposase			0.003	0.71	0.744	0.05	0.463	0.13
IEJ01_11880				hypothetical protein			0	0.71	0.05	0.2	0	0.36
IEJ01_11195	NP_465659.1	lmo2135	-	PTS fructose transporter subunit IIC			0.257	0.71		0		-0.04
IEJ01_04810	NP_464469.1	lmo0944	-	hypothetical protein lmo0944			0	0.71	0.807	0.04	0.249	0.18
IEJ01_13005	NP_465993.1	lmo2470	-	internalin			0.007	0.71	0.857	0.03	0.761	-0.05
IEJ01_13105	NP_466013.1	lmo2490	-	CsbA protein			0	0.71	0.731	0.06	0.015	0.32
IEJ01_00075	NP_463548.1	lmo0015	qoxC	AA3-600 quinol oxidase subunit III			0	0.7	0.873	0.03	0.588	0.08
IEJ01_03195	NP_464153.1	lmo0626	-	hypothetical protein lmo0626			0	0.7	0.146	0.13	0.933	0.01
IEJ01_11800	NP_465780.1	lmo2256	-	hypothetical protein lmo2256			0	0.7	0.014	0.25	0.179	0.14
IEJ01_06660	NP_464791.1	lmo1266	-	hypothetical protein lmo1266			0	0.7	0.951	0.01	0.317	0.15
IEJ01_14410	NP_466250.1	lmo2728	-	MerR family transcriptional regulator			0	0.7	0.271	0.16	0	0.68
IEJ01_14425	NP_466253.1	lmo2731	-	RpiR family transcriptional regulator			0	0.7	0	0.53	0.001	0.35
IEJ01_03880	NP_464290.1	lmo0763	-	hypothetical protein lmo0763			0	0.7	0.862	0.03	0.03	0.21
IEJ01_11975	NP_465818.1	lmo2294	-	protein gp9			0.009	0.7	0.78	-0.04	0	-1.86
IEJ01_03450	NP_464203.1	lmo0676	fliP	flagellar biosynthesis protein FliP	Yes	Yes	0	0.7	0.002	-0.48	0	-0.81
IEJ01_14015	NP_466185.1	lmo2663	-	polyol dehydrogenase			0.001	0.7	0.745	-0.05	0.863	-0.03
IEJ01_09380	NP_465304.1	lmo1779	-	hypothetical protein lmo1779			0	0.69	0.496	0.1	0.001	0.48
IEJ01_06535	NP_464768.1	lmo1243	-	hypothetical protein lmo1243			0	0.69	0.072	0.2	0.003	0.31
IEJ01_14960	NP_466357.1	lmo2835	-	xylose isomerase	Yes		0.089	0.69	0.841	-0.02	0.909	0.02
IEJ01_11595	NP_465739.1	lmo2215	-	ABC transporter ATP-binding protein			0	0.69	0.005	0.25	0	0.33
IEJ01_12165	NP_465850.1	lmo2326	-	hypothetical protein lmo2326			0.002	0.69	0.618	0.08	0.224	-0.22
IEJ01_02720	NP_464059.1	lmo0531	-	hypothetical protein lmo0531			0	0.68	0.113	0.17	0.02	0.23
IEJ01_05825	NP_464690.1	lmo1165	-	ethanolamine utilization protein EutE	Yes		0.115	0.68	0.99	0	0.66	0.06
IEJ01_02465	NP_464008.1	lmo0480	-	transcriptional regulator			0.006	0.68	0.983	0.01	0.585	0.09
IEJ01_04720	NP_464452.1	lmo0927	-	hypothetical protein lmo0927			0	0.68	0.704	0.06	0.707	0.05
IEJ01_06830	NP_464825.1	lmo1300	-	arsenic transporter	Yes		0	0.68	0.111	-0.2	0.184	-0.17
IEJ01_02125	NP_463942.1	lmo0413	-	hypothetical protein lmo0413			0	0.68	0.044	0.36	0.111	0.27
IEJ01_00585	NP_463650.1	lmo0117	lmaB	antigen B			0.004	0.68	0.035	0.47	0	1.01
IEJ01_04015	NP_464317.1	lmo0790	-	transcriptional regulator			0	0.68	0.52	-0.09	0.169	0.17
IEJ01_03775	NP_464269.1	lmo0742	-	ABC transporter ATP-binding protein			0.13	0.68	0.396	0.08	0.409	0.11
IEJ01_07050	NP_464869.1	lmo1344	-	competence protein ComGD			0.238	0.67	0.939	-0.01		-0.02
IEJ01_07870	NP_465032.1	lmo1507	-	response regulator			0	0.67	0.033	0.27	0.008	0.33
IEJ01_05180	NP_464542.1	lmo1017	-	PTS glucose transporter subunit IIA			0	0.67	0.196	0.14	0.556	0.07
IEJ01_02260	NP_463969.1	lmo0440	-	hypothetical protein lmo0440			0	0.67	0.193	0.19	0.015	0.35
IEJ01_10900	NP_465607.1	lmo2083	-	hypothetical protein lmo2083			0	0.67	0.256	0.17	0.76	0.05
IEJ01_08750	NP_465206.1	lmo1681	-	5-methyltetrahydropteroyltriglutamate--homocysteine S-methyltransferase			0.002	0.67	0.22	-0.2	0.217	-0.22
IEJ01_15015	NP_466368.1	lmo2846	-	hypothetical protein lmo2846			0.261	0.67	0.996	0		-0.02
IEJ01_12020	WP_176868326.1						0	0.66	0.566	0.09	0	-1.44
IEJ01_12010	NP_465825.1	lmo2301	-	terminase			0.002	0.66	0.884	0.03	0.026	-0.45
IEJ01_03885	NP_464291.1	lmo0764	-	lipoate-protein ligase			0	0.66	0.992	0	0.384	0.09
IEJ01_02955	NP_464106.1	lmo0578	-	hypothetical protein lmo0578			0	0.65	0.477	0.09	0.735	0.04
IEJ01_01290	NP_463776.1	lmo0245	secE	preprotein translocase subunit SecE	Yes		0	0.65	0.013	0.41	0	0.81
IEJ01_11600	NP_465740.1	lmo2216	-	histidine triad (HIT) protein			0	0.65	0.765	-0.04	0.291	-0.1
IEJ01_02890	NP_464093.1	lmo0565	hisH	imidazole glycerol phosphate synthase subunit HisH			0.028	0.65	0.319	-0.13	0.449	-0.13
IEJ01_12920	NP_465976.1	lmo2453	-	epoxide hydrolase			0	0.65	0.445	-0.11	0.567	-0.08
IEJ01_10635	NP_465554.1	lmo2030	-	hypothetical protein lmo2030	Yes		0	0.64	0.145	0.11	0.486	0.06
IEJ01_03785	NP_464271.1	lmo0744	-	ABC transporter ATP-binding protein			0.018	0.64	0.396	0.12	0.191	0.25
IEJ01_03770	NP_464268.1	lmo0741	-	GntR family transcriptional regulator			0.318	0.64		0.01		0.03
IEJ01_11940	NP_465811.1	lmo2287	-	tape-measure			0	0.64	0.087	-0.2	0	-1.45
IEJ01_11980	NP_465819.1	lmo2295	-	protein gp8			0.009	0.64	0.58	-0.08	0	-1.9
IEJ01_14335	NP_466235.1	lmo2713	-	internalin			0	0.64	0.434	0.09	0.33	0.1
IEJ01_04260	NP_464366.1	lmo0840	-	hypothetical protein lmo0840			0	0.63	0.297	0.15	0.002	0.46
IEJ01_14910	NP_466347.1	lmo2825	serC	phosphoserine aminotransferase			0	0.63	0.373	-0.1	0.302	0.11
IEJ01_01765	NP_463872.1	lmo0342	-	transketolase			0	0.63	0.097	-0.23	0.03	-0.29
IEJ01_04415	NP_464396.1	lmo0870	-	hypothetical protein lmo0870			0.001	0.63	0.641	-0.07	0.575	-0.09
IEJ01_04685	NP_464445.1	lmo0919	-	antibiotic ABC transporter ATP-binding protein			0	0.63	0.352	0.13	0.188	0.18
IEJ01_11930	NP_465809.1	lmo2285	-	protein gp18			0	0.63	0.946	-0.02	0	-0.86
IEJ01_10630	NP_465553.1	lmo2029	-	hypothetical protein lmo2029			0	0.62	0.146	0.14	0.057	0.17
IEJ01_08370	NP_465130.1	lmo1605	murC	UDP-N-acetylmuramate--L-alanine ligase	Yes		0	0.62	0.841	0.03	0.749	-0.04
IEJ01_04320	NP_464378.1	lmo0852	-	TetR family transcriptional regulator			0.011	0.62	0.461	0.11	0.113	0.31
IEJ01_05820	NP_464689.1	lmo1164	-	ATP:cob(I)alamin adenosyltransferase PduO			0.207	0.62	0.975	0	0.595	-0.06
IEJ01_06145	NP_464754.1	lmo1229	-	hypothetical protein lmo1229			0	0.62	0	0.4	0	0.47
IEJ01_00645	NP_463662.1	lmo0129	-	N-acetylmuramoyl-L-alanine amidase			0.015	0.62	0.127	0.29	0.071	0.37
IEJ01_09335	NP_465298.1	lmo1773	purB	adenylosuccinate lyase			0	0.62	0.006	0.25	0.78	-0.03
IEJ01_13035	NP_465999.1	lmo2476	-	aldose 1-epimerase			0	0.62	0.915	-0.02	0.181	-0.19
IEJ01_08510	NP_465158.1	lmo1633	trpE	anthranilate synthase subunit alpha			0.04	0.62	0.1	0.34	0.735	0.06
IEJ01_10280	NP_465483.1	lmo1959	-	ferrichrome-binding protein			0.001	0.61	0.9	-0.02	0.283	-0.17
IEJ01_02975	NP_464110.1	lmo0582	iap	invasion associated secreted endopeptidase	Yes		0	0.61	0.227	0.12	0.638	0.05
IEJ01_02130	NP_463943.1	lmo0414	-	hypothetical protein lmo0414			0	0.61	0.188	0.19	0.157	0.21
IEJ01_12050	NP_465832.1	lmo2308	-	single-stranded DNA-binding protein			0.182	0.61	0.3	0.09	0.306	-0.12
IEJ01_02705	NP_464056.1	lmo0528	-	hypothetical protein lmo0528			0	0.61	0.206	0.15	0.265	0.12
IEJ01_04590	NP_464428.1	lmo0902	-	GntR family transcriptional regulator			0	0.61	0.336	0.12	0.032	0.23
IEJ01_04615	NP_464431.1	lmo0905	-	hypothetical protein lmo0905			0	0.61	0.804	-0.04	0.556	-0.08
IEJ01_04915	NP_464490.1	lmo0965	-	hypothetical protein lmo0965			0	0.61	0.942	0.02	0.655	-0.06
IEJ01_13560	YP_008475643.1	lmo2579a	-	hypothetical protein lmo2579a			0	0.61	0.197	0.19	0.864	-0.03
IEJ01_14740	NP_466314.1	lmo2792	-	hypothetical protein lmo2792			0	0.61	0.912	0.02	0	0.5
IEJ01_12025	WP_003722547.1			sigma-70 family RNA polymerase sigma factor			0.05	0.61	0.786	0.04	0.729	-0.06
IEJ01_12315	NP_465875.1	lmo2352	-	LysR family transcriptional regulator			0	0.61	0.849	-0.03	0.725	0.05
IEJ01_05185	NP_464543.1	lmo1018	-	copper homeostasis protein CutC			0	0.61	0.312	0.14	0.188	0.17
IEJ01_13555	NP_466102.1	lmo2579	-	hypothetical protein lmo2579			0.001	0.61	0.877	0.03	0.812	0.04
IEJ01_09440	NP_465316.1	lmo1791	-	hypothetical protein lmo1791			0	0.6	0.922	0.02	0.77	-0.04
IEJ01_14650	NP_466296.1	lmo2774	-	ABC transporter ATP-binding protein			0.174	0.6	0.71	-0.04	0.894	-0.02
IEJ01_07040	NP_464867.1	lmo1342	-	competence protein ComGF			0.301	0.6	0.915	-0.01		0.02
IEJ01_14565	NP_466281.1	lmo2759	-	hypothetical protein lmo2759			0	0.6	0.422	0.12	0.139	0.22
IEJ01_08490	NP_465154.1	lmo1629	trpF	N-(5\'-phosphoribosyl)anthranilate isomerase			0.034	0.6	0.024	0.6	0.042	0.48
IEJ01_14305	NP_466229.1	lmo2707	-	hypothetical protein lmo2707			0	0.6	0.11	0.16	0	0.32
IEJ01_11470	NP_465714.1	lmo2190	mecA	adaptor protein			0	0.6	0.062	-0.18	0.384	-0.08
IEJ01_07485	NP_464955.1	lmo1430	-	hypothetical protein lmo1430			0.003	0.6	0.378	0.13	0.155	0.25
IEJ01_01870	NP_463892.1	lmo0362	-	hypothetical protein lmo0362			0	0.6	0.203	0.17	0.006	0.35
IEJ01_05760	NP_464677.1	lmo1152	-	PduB protein			0.346	0.6		0.02		0.03
IEJ01_05830	NP_464691.1	lmo1166	-	NADPH-dependent butanol dehydrogenase	Yes		0.084	0.59	0.644	0.06	0.249	0.2
IEJ01_02950	NP_464105.1	lmo0577	-	hypothetical protein lmo0577			0	0.59	0.967	-0.01	0.983	0
IEJ01_14295	NP_466227.1	lmo2705	-	hypothetical protein lmo2705			0	0.59	0.015	0.24	0	0.34
IEJ01_12525	NP_465899.1	lmo2376	-	peptidyl-prolyl cis-trans isomerase			0	0.59	0.03	0.22	0.167	0.14
IEJ01_00330	NP_463599.1	lmo0066	-	toxin			0.002	0.59	0.331	0.15	0.455	0.12
IEJ01_04580	NP_464426.1	lmo0900	-	hypothetical protein lmo0900			0	0.59	0.255	0.16	0.089	0.23
IEJ01_01030	NP_463739.1	lmo0208	-	hypothetical protein lmo0208			0.001	0.59	0.996	0	0.865	0.03
IEJ01_12775	NP_465948.1	lmo2425	-	glycine cleavage system protein H			0	0.58	0	0.37	0.018	0.21
IEJ01_12000	NP_465823.1	lmo2299	-	portal protein			0.001	0.58	0.412	-0.12	0	-1.58
IEJ01_12635	NP_465920.1	lmo2397	-	NifU protein			0	0.58	0.726	0.05	0.009	0.24
IEJ01_04605	NP_464429.1	lmo0903	-	hypothetical protein lmo0903			0	0.58	0.658	0.07	0.371	-0.13
IEJ01_00415	NP_463616.1	lmo0083	-	MerR family transcriptional regulator			0	0.58	0.731	0.06	0.45	0.12
IEJ01_02710	NP_464057.1	lmo0529	-	glucosaminyltransferase	Yes		0	0.58	0.23	0.13	0.162	0.14
IEJ01_02275	NP_463972.1	lmo0443	-	LytR family transcriptional regulator			0	0.58	0	0.45	0	0.57
IEJ01_08920	NP_465216.1	lmo1691	-	deoxyuridine triphosphate nucleotidohydrolase			0	0.58	0.274	0.11	0.212	0.12
IEJ01_08620	NP_465180.1	lmo1655	-	hypothetical protein lmo1655			0	0.57	0.407	0.13	0.006	0.44
IEJ01_12770	NP_465947.1	lmo2424	-	thioredoxin			0	0.57	0.532	0.1	0.725	0.05
IEJ01_09005	NP_465233.1	lmo1708	-	aminoglycoside N3\'-acetyltransferase			0	0.57	0.671	0.05	0.495	0.07
IEJ01_05295	NP_464565.1	lmo1040	-	molybdenum ABC transporter permease			0	0.57	0.892	-0.03	0.756	0.05
IEJ01_11815	NP_465783.1	lmo2259	-	PTS beta-glucoside transporter subunit IIA			0	0.57	0.412	0.09	0.007	0.25
IEJ01_12810	NP_465955.1	lmo2432	-	hypothetical protein lmo2432			0	0.57	0.785	0.05	0.902	-0.02
IEJ01_12130	NP_465844.1	lmo2320	-	hypothetical protein lmo2320			0.071	0.57	0.731	0.05	0.503	-0.11
IEJ01_08955	NP_465223.1	lmo1698	-	ribosomal-protein-alanine N-acetyltransferase	Yes		0	0.57	0.981	0.01	0.503	-0.11
IEJ01_13925	YP_008475644.1	lmo2644a	-	hypothetical protein lmo2644a			0.213	0.57	0	1.94	0	2.05
IEJ01_12030	WP_003722548.1						0.108	0.57	0.929	0.02	0.087	-0.37
IEJ01_14300	NP_466228.1	lmo2706	-	hypothetical protein lmo2706			0.003	0.57	0.368	0.14	0.1	0.28
IEJ01_09385	NP_465305.1	lmo1780	-	aminotripeptidase			0	0.57	0.974	0.01	0.853	-0.02
IEJ01_11925	NP_465808.1	lmo2284	-	protein gp19			0.009	0.57	0.628	-0.07	0	-1.53
IEJ01_02690	NP_464053.1	lmo0525	-	hypothetical protein lmo0525			0	0.56	0.983	0.01	0.93	0.01
IEJ01_03780	NP_464270.1	lmo0743	-	hypothetical protein lmo0743			0.229	0.56	0.697	0.04	0.767	0.04
IEJ01_08505	NP_465157.1	lmo1632	trpG	anthranilate synthase subunit beta			0.173	0.56	0.566	0.06	0.747	0.05
IEJ01_08915	NP_465215.1	lmo1690	-	hypothetical protein lmo1690			0	0.56	0.255	-0.13	0	-0.62
IEJ01_02155	NP_463948.1	lmo0419	-	hypothetical protein lmo0419			0	0.56	0.549	0.09	0.813	0.04
IEJ01_00745	NP_463682.1	lmo0149	-	hypothetical protein lmo0149			0.019	0.56	0.984	0.01	0.165	0.26
IEJ01_13110	NP_466014.1	lmo2491	-	hypothetical protein lmo2491			0	0.56	0.796	0.04	0.06	0.23
IEJ01_11590	NP_465738.1	lmo2214	-	ABC transporter permease			0	0.56	0	0.28	0	0.34
IEJ01_05835	NP_464692.1	lmo1167	glpF	glycerol uptake facilitator protein	Yes		0.188	0.56	0.796	-0.03	0.944	0.01
IEJ01_11890	NP_465802.1	lmo2278	lysA	L-alanoyl-D-glutamate peptidase			0.016	0.55	0.383	-0.13	0	-0.9
IEJ01_02235	NP_463964.1	lmo0435	-	peptidoglycan binding protein			0	0.55	0.513	-0.09	0.132	0.19
IEJ01_05935	NP_464712.1	lmo1187	-	ethanolamine utilization protein EutQ			0.139	0.55	0.52	0.07	0.572	0.08
IEJ01_04840	NP_464475.1	lmo0950	-	hypothetical protein lmo0950			0	0.55	0.193	0.16	0.007	0.3
IEJ01_11920	NP_465807.1	lmo2283	-	protein gp20			0.004	0.55	0.877	-0.03	0	-1.42
IEJ01_07255	NP_464909.1	lmo1384	-	hypothetical protein lmo1384			0	0.55	0.005	0.35	0	0.51
IEJ01_06585	NP_464777.1	lmo1252	-	hypothetical protein lmo1252			0.001	0.55	0.22	0.19	0.334	0.15
IEJ01_12510	NP_465896.1	lmo2373	-	PTS beta-glucoside transporter subunit IIB			0	0.55	0.866	0.03	0.06	-0.25
IEJ01_07630	NP_464984.1	lmo1459	glyQ	glycyl-tRNA synthetase subunit alpha			0.001	0.55	0.636	-0.08	0.05	-0.3
IEJ01_11905	NP_465805.1	lmo2281	-	protein gp22			0.364	0.55	0.791	-0.02		-0.07
IEJ01_15000	NP_466365.1	lmo2843	-	hypothetical protein lmo2843			0	0.55	0.856	-0.03	0.962	0.01
IEJ01_02375	NP_463991.1	lmo0462	-	hypothetical protein lmo0462			0.06	0.55	0.996	0	0.598	-0.09
IEJ01_05270	NP_464560.1	lmo1035	-	PTS beta-glucoside transporter subunit IIABC			0.001	0.55	0.837	-0.04	0.639	0.08
IEJ01_05930	NP_464711.1	lmo1186	-	ethanolamine utilization protein EutH			0.091	0.55	0.721	-0.05	0.584	0.09
IEJ01_13605	NP_466111.1	lmo2588	-	multidrug transporter			0	0.54	0.272	-0.1	0	-0.27
IEJ01_00405	NP_463614.1	lmo0081	-	hypothetical protein lmo0081			0	0.54	0.653	0.07	0.167	0.17
IEJ01_07225	NP_464903.1	lmo1378	lisK	two-component sensor histidine kinase			0	0.54	0.002	0.25	0.186	0.12
IEJ01_12145	NP_465847.1	lmo2323	-	hypothetical protein lmo2323			0.005	0.54	0.228	0.19	0.933	-0.02
IEJ01_09375	NP_465303.1	lmo1778	-	ABC transporter ATP-binding protein			0	0.54	0.053	0.2	0.001	0.3
IEJ01_14450	NP_466258.1	lmo2736	-	hypothetical protein lmo2736	Yes		0	0.54	0.61	-0.07	0.837	-0.03
IEJ01_09125	NP_465256.1	lmo1731	-	sugar ABC transporter permease			0.092	0.54	0.737	-0.04	0.413	-0.13
IEJ01_04010	NP_464316.1	lmo0789	-	hypothetical protein lmo0789			0	0.54	0.305	-0.14	0.131	0.2
IEJ01_00655	NP_463664.1	lmo0131	-	hypothetical protein lmo0131			0	0.54	0.048	0.21	0.346	0.1
IEJ01_00640	NP_463661.1	lmo0128	-	hypothetical protein lmo0128			0.213	0.53	0.909	0.01	0.319	0.14
IEJ01_02580	NP_464031.1	lmo0503	-	PTS fructose transporter subunit IIA			0.265	0.53	0.959	0.01	0.774	-0.03
IEJ01_13230	NP_466038.1	lmo2515	-	two-component response regulator DegU			0	0.53	0.359	0.11	0.009	0.27
IEJ01_08695	NP_465195.1	lmo1670	-	hypothetical protein lmo1670			0	0.53	0.489	0.11	0.004	0.43
IEJ01_09775	NP_465383.1	lmo1858	-	dehydrogenase			0	0.53	0.506	-0.08	0.407	-0.09
IEJ01_13030	NP_465998.1	lmo2475	-	phosphoglucomutase			0	0.53	0.609	0.06	0.443	-0.07
IEJ01_11605	NP_465741.1	lmo2217	-	hypothetical protein lmo2217			0	0.53	0.172	0.15	0.861	-0.02
IEJ01_11995	NP_465822.1	lmo2298	-	protein gp4			0.008	0.53	0.59	-0.08	0	-1.81
IEJ01_00420	NP_463617.1	lmo0084	-	oxidoreductase			0	0.53	0.443	-0.11	0.353	0.13
IEJ01_00560	NP_463645.1	lmo0112	-	Fnr/Crp family transcriptional regulator			0	0.53	0.739	0.06	0.041	0.3
IEJ01_02715	NP_464058.1	lmo0530	-	hypothetical protein lmo0530			0	0.53	0.682	0.06	0.417	0.1
IEJ01_13550	NP_466101.1	lmo2578	-	hypothetical protein lmo2578			0	0.53	0.974	0.01	0.354	0.11
IEJ01_12045	NP_463648.1	lmo0115	lmaD	hypothetical protein lmo0115			0.232	0.53	0.967	-0.01	0.286	-0.14
IEJ01_00515	NP_463636.1	lmo0103	-	NADH oxidase			0	0.52	0.598	-0.08	0.227	-0.18
IEJ01_05285	NP_464563.1	lmo1038	-	hypothetical protein lmo1038			0	0.52	0.107	0.2	0.868	0.03
IEJ01_07245	NP_464907.1	lmo1382	-	hypothetical protein lmo1382			0	0.52	0.374	0.11	0.119	0.18
IEJ01_05405	NP_464587.1	lmo1062	-	ABC transporters permease			0.247	0.52	0.987	0	0.216	0.18
IEJ01_12475	NP_465889.1	lmo2366	-	DeoR family transcriptional regulator			0	0.52	0.566	0.08	0.93	-0.01
IEJ01_12160	WP_003735005.1			hypothetical protein			0.217	0.52	0.139	0.16	0.218	0.19
IEJ01_05620	NP_464649.1	lmo1124	-	hypothetical protein lmo1124			0.016	0.51	0.596	-0.08	0.461	-0.12
IEJ01_00555	NP_463644.1	lmo0111	-	hypothetical protein lmo0111			0.001	0.51	0.382	0.13	0.161	0.21
IEJ01_08485	NP_465153.1	lmo1628	trpB	tryptophan synthase subunit beta			0.009	0.51	0	0.71	0.006	0.51
IEJ01_08500	NP_465156.1	lmo1631	trpD	anthranilate phosphoribosyltransferase			0.063	0.51	0.01	0.68	0.353	0.16
IEJ01_03290	NP_464171.1	lmo0644	-	hypothetical protein lmo0644			0	0.51	0.988	0.01	0.812	-0.03
IEJ01_08900	NP_465212.1	lmo1687	-	hypothetical protein lmo1687			0	0.51	0.434	0.1	0.402	0.1
IEJ01_07035	NP_464866.1	lmo1341	-	competence protein ComG			0.341	0.51	0.868	-0.01		0.03
IEJ01_13175	NP_466027.1	lmo2504	-	cell wall-binding protein			0	0.51	0.744	-0.04	0.2	0.12
IEJ01_00605	NP_463654.1	lmo0121	-	phage tail protein			0.01	0.5	0.003	0.57	0	0.88
IEJ01_14420	NP_466252.1	lmo2730	-	phosphatase			0	0.5	0	0.43	0.001	0.34
IEJ01_05605	NP_464646.1	lmo1121	-	hypothetical protein lmo1121			0.078	0.5	0.653	0.06	0.817	0.04
IEJ01_05150	NP_464536.1	lmo1011	-	tetrahydrodipicolinate succinylase			0	0.5	0.441	0.09	0.369	-0.09
IEJ01_06705	NP_464800.1	lmo1275	topA	DNA topoisomerase I			0	0.5	0.843	0.03	0.372	0.1
IEJ01_11935	NP_465810.1	lmo2286	-	protein gp17			0.007	0.5	0.61	-0.08	0	-1.33
IEJ01_06005	NP_464726.1	lmo1201	-	uroporphyrinogen-III methyltransferase/uroporphyrinogen-III synthase			0.116	0.5	0.931	0.02	0.273	0.19
IEJ01_09865	NP_465401.1	lmo1877	-	formyl-tetrahydrofolate synthetase, partial			0	0.5	0.98	-0.01	0.069	-0.18
IEJ01_07920	NP_465041.1	lmo1516	-	ammonium transporter NrgA			0.009	0.5	0.01	0.48	0	0.93
IEJ01_08010	NP_465059.1	lmo1534	-	L-lactate dehydrogenase			0	0.5	0.832	0.03	0.329	0.09
IEJ01_12115	NP_465841.1	lmo2317	-	hypothetical protein lmo2317			0.069	0.5	0.283	0.16	0.096	-0.35
IEJ01_14340	NP_466236.1	lmo2714	-	pepdidoglycan bound protein			0	0.5	0.005	0.34	0.182	0.17
IEJ01_02780	NP_464071.1	lmo0543	-	PTS sorbitol transporter subunit IIBC			0.174	0.5	0.929	-0.01	0.792	0.04
IEJ01_00165	NP_463566.1	lmo0033	-	endoglucanase			0.095	0.5	0.933	0.01	0.792	0.04
IEJ01_02420	WP_002500244.1			site-specific DNA-methyltransferase			0	0.5	0.839	-0.04	0.169	0.18
IEJ01_11370	NP_465694.1	lmo2170	-	hypothetical protein lmo2170			0.104	0.49	0.296	0.14	0.489	0.11
IEJ01_11355	NP_465691.1	lmo2167	-	hypothetical protein lmo2167			0	0.49	0.952	0.01	0.355	-0.11
IEJ01_12565	NP_465907.1	lmo2384	-	monovalent cation/H+ antiporter subunit G			0	0.49	0	0.33	0	0.34
IEJ01_10695	NP_465566.1	lmo2042	-	cell division protein MraZ			0	0.49	0.886	0.03	0.681	-0.05
IEJ01_12140	NP_465846.1	lmo2322	-	gp44			0.101	0.49	0.793	0.04	0.872	-0.03
IEJ01_06675	NP_464794.1	lmo1269	-	type I signal peptidase			0	0.49	0.49	-0.09	0.957	0
IEJ01_10745	NP_465576.1	lmo2052	coaD	phosphopantetheine adenylyltransferase			0	0.48	0.992	0	0	0.48
IEJ01_03905	NP_464295.1	lmo0768	-	sugar ABC transporter substrate-binding protein			0.213	0.48	0.595	0.06	0.373	-0.13
IEJ01_07550	NP_464968.1	lmo1443	-	hypothetical protein lmo1443			0	0.48	0.981	0.01	0.523	0.08
IEJ01_09485	NP_465325.1	lmo1800	-	protein-tyrosine phosphatase			0.246	0.48	0.996	0	0.993	0
IEJ01_03675	NP_464248.1	lmo0721	-	fibronectin-binding protein			0.001	0.48	0.529	0.1	0.6	0.08
IEJ01_05790	NP_464683.1	lmo1158	-	PduK protein			0.371	0.48	0.549	-0.04		-0.02
IEJ01_12110	WP_014930205.1			class I SAM-dependent methyltransferase			0.374	0.48	0.736	0.03	0.547	-0.06
IEJ01_11285	NP_465677.1	lmo2153	-	flavodoxin			0	0.48	0.841	-0.03	0.515	0.08
IEJ01_06785	NP_464816.1	lmo1291	-	acyltransferase			0	0.48	0.791	0.04	0.916	0.01
IEJ01_13575	NP_466105.1	lmo2582	-	histidine kinase			0	0.48	0.643	0.07	0.134	0.19
IEJ01_08480	NP_465152.1	lmo1627	trpA	tryptophan synthase subunit alpha			0.029	0.48	0.006	0.58	0.056	0.36
IEJ01_12170	WP_012951962.1			hypothetical protein			0.005	0.47	0.644	0.07	0.96	-0.01
IEJ01_12760	NP_465945.1	lmo2422	-	two-component response regulator			0	0.47	0.648	0.07	0.743	0.05
IEJ01_08685	NP_465193.1	lmo1668	-	hypothetical protein lmo1668			0.029	0.47	0.454	0.11	0.674	-0.07
IEJ01_01220	NP_463762.1	lmo0231	-	ATP:guanido phosphotransferase	Yes		0.001	0.47	0.257	-0.16	0.248	-0.17
IEJ01_08995	NP_465231.1	lmo1706	-	transporter			0	0.47	0.535	0.07	0.54	0.06
IEJ01_12915	NP_465975.1	lmo2452	-	carboxylesterase			0	0.47	0.878	0.03	0.05	0.22
IEJ01_04420	NP_464397.1	lmo0871	-	hypothetical protein lmo0871			0.013	0.47	0.52	0.1	0.517	0.11
IEJ01_07605	NP_464979.1	lmo1454	rpoD	RNA polymerase sigma factor RpoD	Yes		0	0.47	0.886	0.03	0.132	0.18
IEJ01_07305	NP_464919.1	lmo1394	-	3-ketoacyl-ACP reductase			0	0.47	0.887	0.02	0.295	0.08
IEJ01_04620	NP_464432.1	lmo0906	-	glutathione reductase			0	0.47	0.99	0	0.176	-0.14
IEJ01_10270	NP_465481.1	lmo1957	fhuG	ferrichrome ABC transporter permease			0	0.47	0.84	0.03	0.714	-0.05
IEJ01_01395	NP_463797.1	lmo0266	-	transcriptional regulator			0.015	0.46	0.718	-0.06	0.953	0.01
IEJ01_13585	NP_466107.1	lmo2584	-	formate dehydrogenase accessory protein			0.33	0.46	0.61	0.05	0.334	0.13
IEJ01_05220	NP_464550.1	lmo1025	-	hypothetical protein lmo1025			0	0.46	0.164	0.17	0.662	0.06
IEJ01_01100	NP_463753.1	lmo0222	hslO	heat shock protein 33	Yes		0.003	0.46	0.902	-0.02	0.992	0
IEJ01_04150	NP_464344.1	lmo0817	-	PhnB protein			0.011	0.46	0.951	0.01	0.681	-0.07
IEJ01_07395	NP_464937.1	lmo1412	-	modulates DNA topology			0.002	0.46	0.666	0.07	0.018	0.34
IEJ01_11280	NP_465676.1	lmo2152	-	thioredoxin			0	0.46	0.933	-0.02	0.072	0.18
IEJ01_12180	NP_465931.1	lmo2408	-	repressor protein			0.012	0.46	0.483	0.11	0.482	-0.11
IEJ01_04845	NP_464476.1	lmo0951	-	hypothetical protein lmo0951			0	0.46	0.01	0.25	0	0.35
IEJ01_11425	NP_465705.1	lmo2181	-	hypothetical protein lmo2181			0	0.46	0.072	-0.21	0.012	-0.29
IEJ01_11350	NP_465690.1	lmo2166	-	hypothetical protein lmo2166			0	0.46	0.839	-0.03	0.489	-0.08
IEJ01_11885	WP_014601427.1						0	0.46	0.188	0.17	0	0.42
IEJ01_07860	NP_465030.1	lmo1505	-	ABC transporter ATP-binding protein			0.118	0.45	0.51	-0.09	0.883	-0.03
IEJ01_11075	NP_465640.1	lmo2116	-	hypothetical protein lmo2116			0	0.45	0.355	-0.12	0.703	0.05
IEJ01_04215	NP_464358.1	lmo0831	-	hypothetical protein lmo0831			0	0.45	0.9	-0.02	0.529	0.07
IEJ01_05635	NP_464652.1	lmo1127	-	hypothetical protein lmo1127			0.003	0.45	0.158	0.21	0.094	0.25
IEJ01_03940	NP_464302.1	lmo0775	-	hypothetical protein lmo0775			0	0.45	0.287	0.14	0.811	-0.04
IEJ01_04460	NP_464405.1	lmo0879	-	hypothetical protein lmo0879			0.41	0.45	0.996	0	0.786	-0.03
IEJ01_03270	NP_464167.1	lmo0640	-	oxidoreductase			0	0.45	0.905	-0.02	0.002	-0.34
IEJ01_12560	NP_465906.1	lmo2383	-	monovalent cation/H+ antiporter subunit F			0.002	0.45	0.287	0.15	0.066	0.27
IEJ01_00970	NP_463727.1	lmo0196	-	regulatory protein SpoVG			0.001	0.45	0.928	0.02	0.928	0.01
IEJ01_00615	NP_463656.1	lmo0123	-	hypothetical protein lmo0123			0.017	0.45	0	0.66	0	1.01
IEJ01_10740	NP_465575.1	lmo2051	-	hypothetical protein lmo2051			0	0.45	0.649	0.06	0.001	0.28
IEJ01_08495	NP_465155.1	lmo1630	trpC	indole-3-glycerol phosphate synthase			0.103	0.45	0.412	0.11	0.71	0.06
IEJ01_05465	NP_464599.1	lmo1074	-	teichoic acid translocation permease TagG			0	0.45	0.967	0.01	0.343	0.1
IEJ01_05990	NP_464723.1	lmo1198	cbiG	cobalamin biosynthesis protein CbiG			0.391	0.45	0.989	0		0.07
IEJ01_05765	NP_464678.1	lmo1153	-	propanediol dehydratase subunit alpha	Yes		0.38	0.45	0.914	-0.01	0.774	-0.03
IEJ01_05615	NP_464648.1	lmo1123	-	hypothetical protein lmo1123			0.062	0.45	0.957	0.01	0.712	-0.06
IEJ01_04865	NP_464480.1	lmo0955	-	hypothetical protein lmo0955			0	0.44	0.131	0.14	0.186	0.12
IEJ01_06165	NP_464758.1	lmo1233	trxA	thioredoxin			0	0.44	0.025	0.27	0.016	0.29
IEJ01_11850	NP_465790.1	lmo2266	-	hypothetical protein lmo2266			0	0.44	0.683	-0.06	0.996	0
IEJ01_03395	NP_464192.1	lmo0665	-	hypothetical protein lmo0665			0.001	0.44	0.996	0	0.072	-0.25
IEJ01_00430	NP_463619.1	lmo0086	-	hypothetical protein lmo0086			0.029	0.44	0.98	-0.01	0.533	0.1
IEJ01_14900	NP_466345.1	lmo2823	-	sporulation protein SpoOJ			0	0.44	0.773	-0.05	0.625	-0.06
IEJ01_00565	NP_463646.1	lmo0113	-	hypothetical protein lmo0113			0	0.44	0.502	0.08	0.246	0.12
IEJ01_06060	NP_464737.1	lmo1212	-	hypothetical protein lmo1212			0.112	0.44	0.472	0.1	0.582	0.1
IEJ01_00440	NP_463621.1	lmo0088	-	ATP synthase subunit C			0.49	0.44		0.02		0.02
IEJ01_07540	NP_464966.1	lmo1441	ispG	4-hydroxy-3-methylbut-2-en-1-yl diphosphate synthase			0.004	0.44	0.989	0	0.412	0.12
IEJ01_12005	NP_465824.1	lmo2300	-	terminase large subunit from bacteriophage A118			0.017	0.44	0.567	-0.09	0	-1.16
IEJ01_05805	NP_464686.1	lmo1161	-	ethanolamine utilization protein EutJ	Yes		0.334	0.44	0.979	0.01	0.293	-0.14
IEJ01_11860	NP_465792.1	lmo2268	addB	ATP-dependent deoxyribonuclease subunit B			0	0.44	0.866	0.02	0.383	0.08
IEJ01_03110	NP_464136.1	lmo0609	-	phage shock protein E			0.01	0.44	0.54	0.1	0.034	0.34
IEJ01_08930	NP_465218.1	lmo1693	recX	recombination regulator RecX			0.002	0.44	0.3	0.15	0.507	0.1
IEJ01_01935	NP_463905.1	lmo0375	-	hypothetical protein lmo0375			0.001	0.44	0.202	0.18	0.004	0.39
IEJ01_06710	NP_464801.1	lmo1276	gid	tRNA (uracil-5-)-methyltransferase Gid			0	0.43	0.932	-0.02	0.902	-0.02
IEJ01_14380	NP_466244.1	lmo2722	-	MerR family transcripitonal regulator			0.001	0.43	0.252	0.15	0.064	0.23
IEJ01_11845	NP_465789.1	lmo2265	-	hypothetical protein lmo2265			0	0.43	0.833	-0.04	0.943	0.01
IEJ01_07925	NP_465042.1	lmo1517	-	nitrogen regulatory PII protein			0.069	0.43	0.197	0.21	0.002	0.69
IEJ01_02675	NP_464050.1	lmo0522	-	transcriptional regulator			0	0.43	0.655	0.07	0.769	0.04
IEJ01_00410	NP_463615.1	lmo0082	-	hypothetical protein lmo0082			0	0.43	0.667	-0.07	0.082	0.22
IEJ01_10385	NP_465504.1	lmo1980	-	hypothetical protein lmo1980			0.374	0.43	0.9	0.01	0.96	0.01
IEJ01_03760	NP_464266.1	lmo0739	-	6-phospho-beta-glucosidase	Yes		0.001	0.43	0.761	-0.05	0.578	-0.08
IEJ01_00630	NP_463659.1	lmo0126	-	hypothetical protein lmo0126			0.153	0.43	0.99	0	0.05	0.46
IEJ01_14080	NP_466198.1	lmo2676	-	DNA polymerase IV			0.003	0.43	0.316	-0.14	0.268	-0.16
IEJ01_12530	NP_465900.1	lmo2377	-	multidrug transporter			0	0.43	0.478	-0.09	0.265	-0.13
IEJ01_00520	NP_463637.1	lmo0104	-	hypothetical protein lmo0104			0.043	0.43	0.069	0.34	0.024	0.43
IEJ01_05135	NP_464533.1	lmo1008	-	hypothetical protein lmo1008			0	0.43	0	0.52	0	0.62
IEJ01_07220	NP_464902.1	lmo1377	lisR	two-component response regulator			0	0.43	0.335	0.11	0.788	-0.03
IEJ01_04625	NP_464433.1	lmo0907	-	phosphoglycerate mutase			0	0.42	0.841	0.03	0.943	-0.01
IEJ01_00570	NP_463647.1	lmo0114	-	repressor C1			0	0.42	0.694	0.06	0.058	0.21
IEJ01_13260	NP_466044.1	lmo2521	-	polyglycerol phosphate biosynthesis protein TagA			0.008	0.42	0.884	0.03	0.679	0.07
IEJ01_11095	NP_465644.1	lmo2120	-	hypothetical protein lmo2120			0	0.42	0.644	0.06	0.227	0.12
IEJ01_05075	NP_464521.1	lmo0996	-	methylated-DNA-protein-cysteine methyltransferase			0.101	0.42	0.37	0.13	0.813	0.04
IEJ01_05470	NP_464600.1	lmo1075	-	teichoic acid ABC transporter ATP-binding protein			0	0.42	0.941	-0.01	0.582	0.07
IEJ01_11855	NP_465791.1	lmo2267	-	ATP-dependent deoxyribonuclease subunit A			0	0.42	0.231	-0.11	0.677	-0.04
IEJ01_03390	NP_464191.1	lmo0664	-	acetyl transferase			0	0.42	0.548	0.08	0.361	-0.1
IEJ01_05955	NP_464716.1	lmo1191	cbiA	cobyrinic acid a,c-diamide synthase			0.509	0.42	0.891	0.01		-0.01
IEJ01_11560	NP_465732.1	lmo2208	-	hypothetical protein lmo2208			0	0.42	0	0.56	0	1.81
IEJ01_05855	NP_464696.1	lmo1171	pduQ	NADPH-dependent butanol dehydrogenase			0.021	0.42	0.309	0.16	0.139	0.24
IEJ01_05275	NP_464561.1	lmo1036	-	hypothetical protein lmo1036			0.001	0.42	0.912	0.02	0.959	0.01
IEJ01_00400	NP_463613.1	lmo0080	-	hypothetical protein lmo0080			0.004	0.41	0.988	-0.01	0.681	-0.06
IEJ01_07725	NP_465003.1	lmo1478	-	MerR family transcriptional regulator			0.034	0.41	0.199	0.21	0.135	0.25
IEJ01_10750	NP_465577.1	lmo2053	-	hypothetical protein lmo2053			0.004	0.41	0.996	0	0	0.65
IEJ01_01430	NP_463804.1	lmo0273	-	hypothetical protein lmo0273			0.002	0.41	0.021	0.31	0.004	0.38
IEJ01_11635	NP_465747.1	lmo2223	-	hypothetical protein lmo2223			0.001	0.41	0.074	0.23	0.197	0.17
IEJ01_14485	NP_466265.1	lmo2743	-	translaldolase			0	0.41	0.645	-0.07	0.314	-0.13
IEJ01_07375	NP_464933.1	lmo1408	-	hypothetical protein lmo1408			0	0.41	0.042	0.25	0.06	0.22
IEJ01_14955	NP_466356.1	lmo2834	-	oxidoreductase	Yes		0.467	0.41	0.732	0.03		0.04
IEJ01_05610	NP_464647.1	lmo1122	-	hypothetical protein lmo1122			0.071	0.41	0.943	0.02	0.872	-0.03
IEJ01_05600	NP_464645.1	lmo1120	-	hypothetical protein lmo1120			0.051	0.4	0.332	0.15	0.265	0.19
IEJ01_12830	NP_465959.1	lmo2436	-	transcription antiterminator			0.002	0.4	0.954	-0.01	0	-0.52
IEJ01_05915	NP_464708.1	lmo1183	-	hypothetical protein lmo1183			0.438	0.4	0.891	0.01	0.859	0.02
IEJ01_07545	NP_464967.1	lmo1442	-	transporter			0	0.4	0.59	0.08	0.599	0.07
IEJ01_11190	NP_465658.1	lmo2134	-	fructose-1,6-biphosphate aldolase type II			0.532	0.4		-0.03		-0.1
IEJ01_06150	NP_464755.1	lmo1230	-	hypothetical protein lmo1230			0.001	0.4	0.014	0.3	0	0.43
IEJ01_03840	NP_464282.1	lmo0755	-	hypothetical protein lmo0755			0.115	0.4	0.781	-0.04	0.94	-0.01
IEJ01_04470	NP_464407.1	lmo0881	-	hypothetical protein lmo0881			0.226	0.4	0.878	0.02	0.904	0.02
IEJ01_00110	NP_463555.1	lmo0022	-	PTS fructose transporter subunit IIB			0.488	0.4	0.049	0.83		0
IEJ01_09140	NP_465259.1	lmo1734	-	glutamate synthase large subunit			0.063	0.4	0.983	0.01	0.894	-0.02
IEJ01_12550	NP_465904.1	lmo2381	-	monovalent cation/H+ antiporter subunit D			0	0.4	0.255	0.13	0.032	0.22
IEJ01_07850	NP_465028.1	lmo1503	-	hypothetical protein lmo1503			0	0.4	0.005	0.31	0.012	0.28
IEJ01_10875	NP_465602.1	lmo2078	-	hypothetical protein lmo2078			0.355	0.39	0.57	0.06	0.811	-0.03
IEJ01_03830	NP_464280.1	lmo0753	-	Crp/Fnr family transcriptional regulator			0.053	0.39	0.931	0.02	0.689	-0.07
IEJ01_03400	NP_464193.1	lmo0666	-	hypothetical protein lmo0666			0	0.39	0.54	0.08	0.422	-0.09
IEJ01_04445	NP_464402.1	lmo0876	-	PTS sugar transporter subunit IIC			0.416	0.39	0.765	-0.03	0.871	-0.02
IEJ01_08400	NP_465136.1	lmo1611	-	aminopeptidase			0	0.39	0.974	0.01	0.193	-0.15
IEJ01_09120	NP_465255.1	lmo1730	-	sugar ABC transporter substrate-binding protein			0.089	0.39	0.684	0.06	0.028	-0.45
IEJ01_00590	NP_463651.1	lmo0118	lmaA	antigen A			0.115	0.39	0.617	0.08	0	0.98
IEJ01_14405	NP_466249.1	lmo2727	-	hypothetical protein lmo2727			0	0.39	0.461	0.09	0.974	0
IEJ01_07250	NP_464908.1	lmo1383	-	isopentenyl pyrophosphate isomerase			0	0.39	0.935	-0.01	0.972	0
IEJ01_13670	NP_466117.1	lmo2594	-	hypothetical protein lmo2594			0.061	0.39	0.658	0.07	0.497	0.11
IEJ01_06715	NP_464802.1	lmo1277	codV	integrase/recombinase			0	0.39	0.628	0.05	0.474	0.06
IEJ01_10155	NP_465458.1	lmo1934	hup	DNA-binding protein HU			0	0.39	0.608	0.07	0.592	-0.07
IEJ01_14145	NP_466199.1	lmo2677	-	esterase			0	0.39	0.358	0.11	0.673	0.05
IEJ01_07875	NP_465033.1	lmo1508	-	histidine kinase			0	0.39	0.58	0.07	0.072	0.18
IEJ01_12680	NP_465929.1	lmo2406	-	hypothetical protein lmo2406			0.001	0.39	0.89	0.03	0.265	-0.14
IEJ01_08015	NP_465060.1	lmo1535	-	hypothetical protein lmo1535			0.003	0.39	0.558	-0.09	0.483	-0.1
IEJ01_14545	NP_466277.1	lmo2755	-	CoA-transferase			0	0.38	0.776	-0.04	0.013	-0.22
IEJ01_05640	NP_464653.1	lmo1128	-	hypothetical protein lmo1128			0.07	0.38	0.641	0.07	0.795	-0.05
IEJ01_07175	NP_464894.1	lmo1369	-	phosphotransbutyrylase			0.002	0.38	0.996	0	0.3	0.13
IEJ01_05130	NP_464532.1	lmo1007	-	hypothetical protein lmo1007			0.006	0.38	0.396	0.12	0.249	0.16
IEJ01_07005	NP_464860.1	lmo1335	rpmG	50S ribosomal protein L33			0.003	0.38	0	0.45	0.001	0.41
IEJ01_11540	NP_465728.1	lmo2204	-	hypothetical protein lmo2204			0.04	0.38	0.884	0.03	0.895	0.02
IEJ01_01940	NP_463906.1	lmo0376	-	transcriptional regulator			0	0.38	0.129	0.18	0.001	0.36
IEJ01_05895	NP_464704.1	lmo1179	-	alcohol dehydrogenase			0.259	0.38	0.904	-0.02	0.663	0.07
IEJ01_04350	NP_464384.1	lmo0858	-	LacI family transcriptional regulator			0.002	0.38	0.775	0.05	0.502	-0.09
IEJ01_14770	NP_466320.1	lmo2798	-	phosphatase			0.32	0.38	0.816	0.03	0.734	-0.05
IEJ01_06680	NP_464795.1	lmo1270	-	type I signal peptidase			0	0.38	0.932	-0.02	0.895	-0.02
IEJ01_07385	NP_464935.1	lmo1410	-	hypothetical protein lmo1410			0.001	0.38	0.583	0.08	0.004	0.34
IEJ01_00045	NP_463542.1	lmo0009	-	spermidine acetyltransferase			0.001	0.38	0.155	0.17	0.252	0.14
IEJ01_04560	NP_464425.1	lmo0899	-	hypothetical protein lmo0899			0.001	0.37	0.781	0.05	0.995	0
IEJ01_03140	NP_464142.1	lmo0615	-	hypothetical protein lmo0615			0.031	0.37	0.769	0.05	0.496	0.11
IEJ01_00175	NP_463568.1	lmo0035	-	glucosamine--fructose-6-phosphate aminotransferase			0.084	0.37	0.653	0.07	0.955	-0.01
IEJ01_11830	NP_465786.1	lmo2262	-	hypothetical protein lmo2262			0	0.37	0.433	-0.1	0.879	-0.02
IEJ01_05975	NP_464720.1	lmo1195	cbiE	cobalt-precorrin-6Y C(5)-methyltransferase			0.561	0.37		0.02		-0.02
IEJ01_01785	NP_463876.1	lmo0346	-	triosephosphate isomerase			0.311	0.37	0.472	-0.08	0.144	-0.28
IEJ01_05645	NP_464654.1	lmo1129	-	hypothetical protein lmo1129			0.263	0.37	0.946	0.01	0.898	-0.02
IEJ01_04860	NP_464479.1	lmo0954	-	hypothetical protein lmo0954			0	0.37	0.221	0.14	0.001	0.33
IEJ01_02000	NP_463917.1	lmo0387	-	hypothetical protein lmo0387	Yes		0	0.37	0.866	-0.03	0.65	-0.05
IEJ01_05325	NP_464571.1	lmo1046	moaC	molybdenum cofactor biosynthesis protein MoaC			0.18	0.37	0.615	0.07	0.812	-0.04
IEJ01_10130	NP_465453.1	lmo1929	ndk	nucleoside diphosphate kinase	Yes		0	0.37	0.358	-0.11	0.84	0.03
IEJ01_11900	WP_012951557.1						0.429	0.37	0.583	-0.05	0.008	-1.4
IEJ01_01020	NP_463737.1	lmo0206	-	hypothetical protein lmo0206			0.294	0.36	0.614	0.06	0.23	0.21
IEJ01_12675	NP_465928.1	lmo2405	-	hypothetical protein lmo2405			0	0.36	0.067	-0.21	0.959	0.01
IEJ01_11080	NP_465641.1	lmo2117	-	hypothetical protein lmo2117			0.009	0.36	0.254	0.16	0.243	0.16
IEJ01_12090	WP_003731837.1			hypothetical protein			0.457	0.36	0.887	-0.02	0.188	-0.16
IEJ01_01685	NP_463854.1	lmo0324	-	hypothetical protein lmo0324			0.551	0.36	0.768	-0.02		-0.02
IEJ01_14865	NP_466338.1	lmo2816	-	MFS transporter			0.504	0.36	0.549	0.05	0.591	0.06
IEJ01_00600	NP_463653.1	lmo0120	-	hypothetical protein lmo0120			0.232	0.35	0.967	0.01	0.028	0.53
IEJ01_00160	NP_463565.1	lmo0032	-	xylose repressor			0.494	0.35	0.887	-0.01	0.193	-0.14
IEJ01_06655	NP_464790.1	lmo1265	-	hypothetical protein lmo1265			0.221	0.35	0.435	0.11	0.616	0.09
IEJ01_04175	NP_464349.1	lmo0822	-	transcriptional regulator			0.009	0.35	0.82	-0.04	0.77	0.04
IEJ01_03360	NP_464185.1	lmo0658	-	hypothetical protein lmo0658			0.001	0.35	0.731	0.05	0.879	0.02
IEJ01_09785	NP_465385.1	lmo1860	-	methionine sulfoxide reductase A			0	0.35	0.319	-0.1	0.061	-0.15
IEJ01_11215	NP_465663.1	lmo2139	-	ABC transporter ATP-binding protein			0.002	0.35	0.105	0.2	0.457	-0.09
IEJ01_11295	NP_465679.1	lmo2155	-	ribonucleotide-diphosphate reductase subunit alpha			0.003	0.35	0.808	0.04	0.493	0.09
IEJ01_10380	NP_465503.1	lmo1979	-	hypothetical protein lmo1979			0.002	0.35	0.886	0.03	0	0.46
IEJ01_12150	NP_465848.1	lmo2324	-	anti-repressor			0.018	0.35	0.946	-0.01	0.093	-0.24
IEJ01_11140	NP_465653.1	lmo2129	-	hypothetical protein lmo2129			0.019	0.35	0.932	-0.02	0.809	-0.04
IEJ01_02280	NP_463973.1	lmo0444	-	hypothetical protein lmo0444			0.001	0.35	0.017	0.26	0.004	0.3
IEJ01_14170	NP_466204.1	lmo2682	kdpA	potassium-transporting ATPase subunit A			0.551	0.35	0.974	0		0
IEJ01_07845	NP_465027.1	lmo1502	-	Holliday junction resolvase			0.001	0.35	0.003	0.31	0.024	0.24
IEJ01_06125	NP_464750.1	lmo1225	-	MarR family transcriptional regulator			0.001	0.35	0.305	0.12	0.016	0.26
IEJ01_10560	NP_465539.1	lmo2015	-	alpha-mannosidase			0.011	0.35	0.472	-0.11	0.738	-0.06
IEJ01_12755	NP_465944.1	lmo2421	-	two-component sensor histidine kinase			0	0.35	0.82	0.03	0.84	0.02
IEJ01_05380	NP_464582.1	lmo1057	-	L-lactate dehydrogenase			0.002	0.35	0.644	-0.07	0.725	0.05
IEJ01_02585	NP_464032.1	lmo0504	-	hypothetical protein lmo0504			0.545	0.34	0.516	0.04		-0.01
IEJ01_14665	NP_466299.1	lmo2777	-	multidrug transporter			0.003	0.34	0.208	-0.16	0.818	-0.03
IEJ01_05265	NP_464559.1	lmo1034	-	glycerol kinase			0.329	0.34	0.996	0	0.784	0.04
IEJ01_12120	NP_465842.1	lmo2318	-	hypothetical protein lmo2318			0.242	0.34	0.989	0	0.029	-0.55
IEJ01_10045	NP_465436.1	lmo1912	-	histidine kinase			0.002	0.34	0.771	-0.05	0.008	0.3
IEJ01_08590	NP_465174.1	lmo1649	-	hypothetical protein lmo1649			0.001	0.34	0.517	0.09	0.117	0.17
IEJ01_01865	NP_463891.1	lmo0361	-	membrane protein			0.002	0.34	0.728	-0.05	0.662	0.06
IEJ01_04050	NP_464324.1	lmo0797	-	hypothetical protein lmo0797			0.02	0.34	0	0.57	0.001	0.47
IEJ01_09145	NP_465260.1	lmo1735	gltC	transcription activator of glutamate synthase operon GltC			0.029	0.34	0.162	0.21	0.13	0.22
IEJ01_10935	NP_465613.1	lmo2089	-	lipase			0	0.34	0.638	-0.06	0.001	-0.31
IEJ01_00840	NP_463701.1	lmo0168	-	AbrB family transcriptional regulator			0.051	0.34	0.595	0.08	0.002	0.51
IEJ01_12015	WP_012582399.1						0.274	0.34	0.873	-0.03	0	-1.76
IEJ01_09805	NP_465389.1	lmo1864	-	hemolysin			0.033	0.34	0.787	0.05	0.218	0.18
IEJ01_12555	NP_465905.1	lmo2382	-	monovalent cation/H+ antiporter subunit E			0	0.34	0.13	0.15	0.003	0.25
IEJ01_03130	NP_464140.1	lmo0613	-	oxidoreductase			0.038	0.33	0.816	-0.04	0.33	-0.15
IEJ01_05175	NP_464541.1	lmo1016	gbuC	glycine/betaine ABC transporter substrate-binding protein	Yes		0.001	0.33	0.107	-0.18	0.002	-0.31
IEJ01_01660	NP_463849.1	lmo0319	-	phospho-beta-glucosidase			0.004	0.33	0.412	0.11	0.329	-0.12
IEJ01_10905	NP_465608.1	lmo2084	-	hypothetical protein lmo2084			0.049	0.33	0.155	-0.22	0.35	-0.14
IEJ01_11550	NP_465730.1	lmo2206	clpB	Clp protease subunit B			0.002	0.33	0.991	0	0.572	0.07
IEJ01_02655	NP_464046.1	lmo0518	-	hypothetical protein lmo0518			0.35	0.33	0.617	-0.06	0.65	-0.07
IEJ01_07230	NP_464904.1	lmo1379	-	sporulation protein SpoJ			0	0.33	0.086	0.15	0.002	0.25
IEJ01_03350	NP_464183.1	lmo0656	-	hypothetical protein lmo0656			0.001	0.33	0.003	0.32	0	0.39
IEJ01_05225	NP_464551.1	lmo1026	-	LytR protein			0	0.33	0.454	0.09	0.104	0.16
IEJ01_15030	NP_466371.1	lmo2849	-	rhamnulokinase			0.604	0.33		0.01		-0.02
IEJ01_08090	NP_465075.1	lmo1550	comC	competence protein ComC			0.202	0.33	0.967	0.01	0.005	0.64
IEJ01_04490	NP_464411.1	lmo0885	acpS	4\'-phosphopantetheinyl transferase			0.066	0.32	0.272	0.17	0.95	-0.01
IEJ01_12265	NP_465865.1	lmo2342	-	16S pseudouridylate synthase			0.008	0.32	0.032	0.27	0.002	0.38
IEJ01_00470	NP_463627.1	lmo0094	-	hypothetical protein lmo0094			0.167	0.32	0.983	0.01	0.527	0.11
IEJ01_07840	NP_465026.1	lmo1501	-	hypothetical protein lmo1501			0.004	0.32	0.02	0.27	0.075	0.21
IEJ01_10870	NP_465601.1	lmo2077	-	glycoprotease			0.054	0.32	0.939	0.02	0.128	-0.24
IEJ01_10040	NP_465435.1	lmo1911	-	histidine kinase			0.003	0.32	0.931	0.02	0.02	0.26
IEJ01_07815	NP_465021.1	lmo1496	greA	transcription elongation factor GreA			0	0.32	0.491	0.08	0.054	0.19
IEJ01_10310	NP_465489.1	lmo1965	-	hypothetical protein lmo1965			0.002	0.32	0.227	0.14	0.714	0.05
IEJ01_00910	NP_463715.1	lmo0184	-	oligo-1,6-glucosidase			0.026	0.32	0.11	0.23	0.842	0.03
IEJ01_14895	NP_466344.1	lmo2822	-	hypothetical protein lmo2822			0.007	0.32	0.175	-0.17	0.596	-0.07
IEJ01_02295	NP_463976.1	lmo0447	-	glutamate decarboxylase			0.464	0.32	0.96	-0.01	0.602	-0.07
IEJ01_11450	NP_465710.1	lmo2186	-	hypothetical protein lmo2186			0.011	0.32	0.1	-0.22	0.005	-0.35
IEJ01_04970	NP_464500.1	lmo0975	-	ribose-5-phosphate isomerase A			0.133	0.32	0.697	-0.06	0.515	-0.11
IEJ01_11400	NP_465700.1	lmo2176	-	TetR family transcriptional regulator			0.027	0.32	0.776	0.05	0.162	0.2
IEJ01_08530	NP_465162.1	lmo1637	-	hypothetical protein lmo1637	Yes		0	0.32	0.325	-0.08	0.008	-0.18
IEJ01_10700	NP_465567.1	lmo2043	-	MFS transporter			0.021	0.32	0.83	-0.04	0.933	0.01
IEJ01_06670	NP_464793.1	lmo1268	clpX	ATP-dependent protease ATP-binding subunit ClpX			0	0.32	0.983	0	0.841	0.02
IEJ01_00265	NP_463586.1	lmo0053	rplI	50S ribosomal protein L9			0.004	0.32	0.28	0.13	0.506	-0.08
IEJ01_05355	NP_464577.1	lmo1052	pdhA	pyruvate dehydrogenase subunit E1 alpha			0.015	0.32	0.786	-0.05	0.205	-0.17
IEJ01_08475	NP_465151.1	lmo1626	-	hypothetical protein lmo1626			0.004	0.32	0	0.42	0	0.42
IEJ01_08410	NP_465138.1	lmo1613	-	hypothetical protein lmo1613			0.093	0.32	0.933	0.02	0.883	0.03
IEJ01_03200	NP_464154.1	lmo0627	-	pepdidoglycan bound protein			0.116	0.31	0.438	-0.12	0.726	0.06
IEJ01_03300	NP_464173.1	lmo0646	-	hypothetical protein lmo0646			0.045	0.31	0.003	-0.48	0.011	-0.38
IEJ01_01095	NP_463752.1	lmo0221	-	pantothenate kinase			0.024	0.31	0.549	-0.09	0.558	0.09
IEJ01_12545	NP_465903.1	lmo2380	-	monovalent cation/H+ antiporter subunit C			0.034	0.31	0.782	-0.05	0.324	0.14
IEJ01_07310	NP_464920.1	lmo1395	-	hypothetical protein lmo1395			0	0.31	0.538	0.06	0	0.22
IEJ01_11345	NP_465689.1	lmo2165	-	Crp/Fnr family transcriptional regulator			0.006	0.31	0.884	-0.03	0.634	-0.06
IEJ01_08625	NP_465181.1	lmo1656	-	hypothetical protein lmo1656			0.106	0.31	0.653	0.07	0.165	0.23
IEJ01_05095	NP_464525.1	lmo1000	-	phytoene dehydrogenase			0.006	0.31	0.549	0.08	0.733	0.05
IEJ01_04485	NP_464410.1	lmo0884	-	protoporphyrinogen oxidase			0.003	0.31	0.248	0.14	0.856	0.03
IEJ01_12610	NP_465916.1	lmo2393	-	hypothetical protein lmo2393			0.272	0.31	0.5	-0.09	0.603	-0.09
IEJ01_10575	NP_465542.1	lmo2018	dapF	diaminopimelate epimerase			0	0.31	0.97	-0.01	0.018	0.16
IEJ01_11005	NP_465627.1	lmo2103	eutD	phosphotransacetylase			0.001	0.31	0.004	0.28	0.449	0.08
IEJ01_13610	NP_466112.1	lmo2589	-	TetR family transcriptional regulator			0.004	0.31	0.248	0.14	0.566	0.07
IEJ01_11820	NP_465784.1	lmo2260	-	hypothetical protein lmo2260			0	0.31	0.996	0	0.037	0.17
IEJ01_02600	NP_464035.1	lmo0507	-	PTS galactitol transporter subunit IIB			0.607	0.31	0.79	-0.02		-0.03
IEJ01_00170	NP_463567.1	lmo0034	-	PTS cellbiose transporter subunit IIC			0.29	0.31	0.878	-0.03	0.796	0.04
IEJ01_05670	NP_464659.1	lmo1134	-	regulatory protein			0.065	0.31	0.595	0.08	0.051	0.3
IEJ01_08395	NP_465135.1	lmo1610	-	hypothetical protein lmo1610			0.06	0.3	0.873	-0.03	0.431	-0.12
IEJ01_11440	NP_465708.1	lmo2184	-	ferrichrome ABC transporter substrate-binding protein			0.006	0.3	0.171	-0.17	0.032	-0.24
IEJ01_09800	NP_465388.1	lmo1863	-	hypothetical protein lmo1863			0.003	0.3	0.171	0.16	0.127	0.17
IEJ01_09395	NP_465307.1	lmo1782	-	3\'-exo-deoxyribonuclease			0.001	0.3	0.293	0.12	0.513	-0.07
IEJ01_02755	NP_464066.1	lmo0538	-	N-acyl-L-amino acid amidohydrolase			0.001	0.3	0.59	-0.07	0.851	0.02
IEJ01_06620	NP_464783.1	lmo1258	-	hypothetical protein lmo1258			0.024	0.3	0.61	0.08	0.894	-0.02
IEJ01_07590	NP_464976.1	lmo1451	ispH	4-hydroxy-3-methylbut-2-enyl diphosphate reductase			0.002	0.3	0.647	0.06	0.042	0.21
IEJ01_10735	NP_465574.1	lmo2050	-	excinuclease ABC subunit A			0.082	0.3	0.893	0.03	0.731	0.06
IEJ01_14240	NP_466216.1	lmo2694	-	lysine decarboxylase			0.034	0.3	0.506	0.1	0.94	-0.01
IEJ01_10610	NP_465549.1	lmo2025	nadA	quinolinate synthetase			0.365	0.3	0.839	-0.03	0.636	0.08
IEJ01_11290	NP_465678.1	lmo2154	nrdF	ribonucleotide-diphosphate reductase subunit beta			0.014	0.3	0.969	0.01	0.423	0.1
IEJ01_04275	NP_464369.1	lmo0843	-	hypothetical protein lmo0843			0.127	0.29	0.815	-0.04	0.769	-0.05
IEJ01_10620	NP_465551.1	lmo2027	-	cell surface protein, internalin proteins			0.03	0.29	0.61	0.08	0.295	0.14
IEJ01_06075	NP_464740.1	lmo1215	-	N-acetylmuramoyl-L-alanine amidase			0.014	0.29	0.436	0.11	0.306	0.13
IEJ01_09515	NP_465331.1	lmo1806	acpP	acyl carrier protein			0.017	0.29	0	0.54	0.001	0.41
IEJ01_10795	NP_465586.1	lmo2062	-	copper transporter			0.062	0.29	0.183	-0.19	0.957	0.01
IEJ01_10290	NP_465485.1	lmo1961	-	oxidoreductase			0.001	0.29	0.358	-0.1	0.894	0.02
IEJ01_10510	NP_465529.1	lmo2005	-	oxidoreductase			0.052	0.29	0.358	0.13	0.054	0.27
IEJ01_07560	NP_464970.1	lmo1445	zurR	ZurR family transcriptional regulator			0.003	0.29	0.381	0.1	0.293	0.11
IEJ01_06990	NP_464857.1	lmo1332	-	GTPase EngC			0.002	0.29	0.796	0.04	0.252	-0.12
IEJ01_03965	NP_464307.1	lmo0780	-	hypothetical protein lmo0780			0.47	0.29	0.553	-0.06	0.868	0.03
IEJ01_03705	NP_464255.1	lmo0728	-	riboflavin kinase / FAD synthase			0.023	0.29	0.864	-0.03	0.459	-0.1
IEJ01_06580	WP_003723550.1			hypothetical protein			0.025	0.29	0.332	0.13	0.001	0.4
IEJ01_02785	NP_464072.1	lmo0544	-	PTS sorbitol transporter subunit IIC			0.631	0.29	0.901	0.01		-0.04
IEJ01_05960	NP_464717.1	lmo1192	cobD	cobalamin biosynthesis protein			0.64	0.29	0.967	0		0.01
IEJ01_09025	NP_465237.1	lmo1712	-	multidrug resistance protein			0.006	0.29	0.013	0.27	0.016	0.25
IEJ01_11805	NP_465781.1	lmo2257	-	hypothetical protein lmo2257			0.096	0.28	0.998	0	0.18	0.21
IEJ01_06825	NP_464824.1	lmo1299	glnA	glutamine synthetase			0.172	0.28	0.866	0.03	0.489	0.12
IEJ01_11410	NP_465702.1	lmo2178	-	peptidoglycan binding protein			0.075	0.28	0.776	-0.05	0.364	0.13
IEJ01_07235	NP_464905.1	lmo1380	-	hypothetical protein lmo1380			0.009	0.28	0.035	0.24	0.001	0.35
IEJ01_14980	NP_466361.1	lmo2839	-	sugar ABC transporter substrate-binding protein			0.488	0.28	0.866	0.02	0.983	0
IEJ01_06530	NP_464767.1	lmo1242	-	hypothetical protein lmo1242			0.006	0.28	0.614	-0.07	0.804	-0.03
IEJ01_07390	NP_464936.1	lmo1411	-	hypothetical protein lmo1411			0.125	0.28	0.967	0.01	0.175	0.22
IEJ01_06565	NP_464774.1	lmo1249	-	hypothetical protein lmo1249			0.422	0.28	0.796	0.03	0.007	0.79
IEJ01_07505	NP_464959.1	lmo1434	-	hypothetical protein lmo1434	Yes		0.003	0.28	0.607	0.07	0.731	-0.04
IEJ01_05740	NP_464673.1	lmo1148	-	cobalamin (5\'-phosphatase) synthetase			0.66	0.28		0.02		0.03
IEJ01_07980	NP_465053.1	lmo1528	-	hypothetical protein lmo1528			0	0.28	0.158	0.12	0.032	0.16
IEJ01_01720	NP_463863.1	lmo0333	-	internalin			0.019	0.28	0.904	-0.02	0.157	0.17
IEJ01_14130	WP_014601544.1			arsenical pump-driving ATPase			0.005	0.28	0.05	0.21	0.025	0.23
IEJ01_00270	NP_463587.1	lmo0054	dnaC	replicative DNA helicase			0.002	0.28	0.583	0.07	0.598	-0.06
IEJ01_10160	NP_465459.1	lmo1935	-	protein-tyrosine/serine phosphatase			0.001	0.28	0.765	0.04	0.545	0.06
IEJ01_05995	NP_464724.1	lmo1199	cbiH	precorrin-3B C17-methyltransferase			0.618	0.28	0.551	-0.04		-0.09
IEJ01_09085	NP_465248.1	lmo1723	-	hypothetical protein lmo1723			0.243	0.27	0.957	-0.01	0.926	0.02
IEJ01_02970	NP_464109.1	lmo0581	-	hypothetical protein lmo0581	Yes		0.003	0.27	0.21	-0.14	0.236	-0.12
IEJ01_05235	NP_464553.1	lmo1028	-	hypothetical protein lmo1028			0.017	0.27	0.416	0.11	0.002	0.35
IEJ01_08910	NP_465214.1	lmo1689	-	A/G-specific adenine glycosylase			0.083	0.27	0.886	-0.03	0.392	0.13
IEJ01_14135	WP_010738921.1		ArsD	arsenite efflux transporter metallochaperone ArsD			0.012	0.27	0.001	0.36	0	0.54
IEJ01_02830	NP_464081.1	lmo0553	-	hypothetical protein lmo0553			0.027	0.27	0.322	0.12	0.244	-0.15
IEJ01_11220	NP_465664.1	lmo2140	-	ABC transporter permease			0.022	0.27	0.831	-0.04	0.085	-0.21
IEJ01_12670	NP_465927.1	lmo2404	-	hypothetical protein lmo2404			0.002	0.27	0.065	-0.18	0.664	0.05
IEJ01_05450	NP_464596.1	lmo1071	-	cell division protein FtsW			0.001	0.27	0.653	-0.06	0.625	0.05
IEJ01_10100	NP_465447.1	lmo1923	aroE	3-phosphoshikimate 1-carboxyvinyltransferase			0.005	0.27	0.896	-0.02	0.364	-0.1
IEJ01_07320	NP_464922.1	lmo1397	cinA	competence damage-inducible protein CinA			0.026	0.27	0.548	-0.09	0.492	0.09
IEJ01_05920	NP_464709.1	lmo1184	-	carbon dioxide concentrating mechanism protein			0.677	0.27		-0.01		-0.07
IEJ01_11520	NP_465724.1	lmo2200	-	MarR family transcriptional regulator			0.027	0.27	0.001	-0.4	0.236	-0.15
IEJ01_07315	NP_464921.1	lmo1396	-	phosphatidylglycerophosphate synthase			0.025	0.27	0.933	0.02	0.164	0.17
IEJ01_11750	NP_465770.1	lmo2246	-	hypothetical protein lmo2246			0.077	0.27	0.887	-0.03	0.434	-0.12
IEJ01_05360	NP_464578.1	lmo1053	PdhB	pyruvate dehydrogenase subunit E1 beta			0.015	0.27	0.935	0.01	0.596	-0.07
IEJ01_09780	NP_465384.1	lmo1859	-	methionine sulfoxide reductase B			0	0.27	0.659	-0.05	0.05	-0.16
IEJ01_01850	NP_463889.1	lmo0359	-	D-fructose-1,6-biphosphate aldolase	Yes		0.02	0.27	0.312	0.13	0.023	0.26
IEJ01_11340	NP_465688.1	lmo2164	-	AraC family transcriptional regulator			0.034	0.26	0.312	0.13	0.1	0.21
IEJ01_00575	NP_463648.1	lmo0115	lmaD	hypothetical protein lmo0115			0.433	0.26	0.62	0.06	0.012	0.69
IEJ01_04675	NP_464443.1	lmo0917	-	beta-glucosidase			0.503	0.26	0.329	-0.1	0.453	-0.11
IEJ01_02775	NP_464070.1	lmo0542	-	PTS sorbitol transporter subunit IIA			0.538	0.26	0.956	-0.01	0.735	0.05
IEJ01_11430	NP_465706.1	lmo2182	-	ferrichrome ABC transporter ATP-binding protein			0.043	0.26	0.022	-0.3	0.017	-0.3
IEJ01_07215	NP_464901.1	lmo1376	-	6-phosphogluconate dehydrogenase	Yes		0	0.26	0.681	-0.04	0	-0.38
IEJ01_10785	NP_465584.1	lmo2060	-	hypothetical protein lmo2060			0.009	0.26	0.996	0	0.324	0.11
IEJ01_01385	NP_463795.1	lmo0264	inlE	internalin E	Yes		0.334	0.26	0.605	-0.08	0.448	0.13
IEJ01_07155	NP_464890.1	lmo1365	tktB	1-deoxy-D-xylulose-5-phosphate synthase			0.001	0.26	0.621	-0.06	0.548	0.06
IEJ01_10145	NP_465456.1	lmo1932	-	heptaprenyl diphosphate synthase subunit I			0.012	0.26	0.158	-0.16	0.026	-0.23
IEJ01_07345	NP_464927.1	lmo1402	-	hypothetical protein lmo1402			0.003	0.26	0.988	0	0.928	0.01
IEJ01_06365	WP_012581464.1			DUF3310 domain-containing protein			0.464	0.26	0.314	0.12	0.455	0.12
IEJ01_05440	NP_464594.1	lmo1069	-	hypothetical protein lmo1069			0.028	0.26	0.004	0.35	0.008	0.31
IEJ01_11445	NP_465709.1	lmo2185	-	hypothetical protein lmo2185			0.034	0.26	0.301	-0.13	0.031	-0.26
IEJ01_05085	NP_464523.1	lmo0998	-	hypothetical protein lmo0998			0.017	0.26	0	0.48	0	0.6
IEJ01_11090	NP_465643.1	lmo2119	-	hypothetical protein lmo2119			0.018	0.26	0.83	0.04	0.792	0.03
IEJ01_13720	NP_466127.1	lmo2604	-	hypothetical protein lmo2604			0.01	0.26	0.83	0.03	0.286	0.11
IEJ01_05320	NP_464570.1	lmo1045	-	molybdopterin converting factor subunit 1			0.557	0.25	0.841	-0.02	0.615	-0.07
IEJ01_13930	NP_466168.1	lmo2646	-	hypothetical protein lmo2646			0.638	0.25	0.002	1.73	0	2.09
IEJ01_11680	NP_465756.1	lmo2232	-	hypothetical protein lmo2232			0.003	0.25	0.967	0.01	0.759	0.03
IEJ01_10860	NP_465599.2	lmo2075	-	DNA-binding/iron metalloprotein/AP endonuclease			0.039	0.25	0.532	0.09	0.624	-0.07
IEJ01_07160	NP_464891.1	lmo1366	-	hypothetical protein lmo1366			0.001	0.25	0.446	-0.08	0.521	0.06
IEJ01_12225	NP_465857.1	lmo2334	-	transcriptional regulator			0.009	0.25	0.824	0.04	0.448	0.09
IEJ01_04680	NP_464444.1	lmo0918	-	transcription antiterminator BglG			0.321	0.25	0.658	-0.07	0.135	0.28
IEJ01_10680	NP_465563.1	lmo2039	pbpB	penicillin-binding protein 2B			0.007	0.25	0.104	0.17	0.003	0.28
IEJ01_01415	NP_463801.1	lmo0270	-	hypothetical protein lmo0270			0.007	0.25	0.016	0.24	0	0.36
IEJ01_07300	NP_464918.1	lmo1393	-	peptidase			0.015	0.25	0.516	-0.08	0.192	-0.14
IEJ01_03330	NP_464179.1	lmo0652	-	hypothetical protein lmo0652			0.004	0.25	0.535	0.08	0.795	-0.03
IEJ01_10135	NP_465454.1	lmo1930	-	heptaprenyl diphosphate synthase subunit II			0.005	0.25	0.014	-0.23	0.033	-0.2
IEJ01_01285	NP_463775.1	lmo0244	rpmG	50S ribosomal protein L33 type II			0.052	0.25	0.006	0.33	0	0.76
IEJ01_12950	NP_465983.1	lmo2460	-	transcriptional regulator			0.162	0.25	0.602	-0.08	0.253	-0.18
IEJ01_05875	NP_464700.1	lmo1175	eutB	ethanolamine ammonia-lyase large subunit			0.624	0.25	0.893	-0.01	0.705	-0.05
IEJ01_12375	NP_465888.1	lmo2365	-	RofA family transcriptional regulator			0.363	0.25	0.669	0.06	0.652	-0.08
IEJ01_02995	NP_464114.1	lmo0586	-	hypothetical protein lmo0586			0.483	0.25	0.838	-0.03	0.799	-0.04
IEJ01_04180	NP_464350.1	lmo0823	-	oxidoreductase			0.062	0.25	0.458	-0.1	0.506	-0.09
IEJ01_09165	NP_465264.1	lmo1739	-	amino acid ABC transporter ATP-binding protein			0.279	0.25	0.331	-0.15	0.236	-0.21
IEJ01_08265	NP_465110.1	lmo1585	-	peptidase			0.001	0.25	0	0.35	0	0.28
IEJ01_14315	NP_466231.1	lmo2709	-	hypothetical protein lmo2709			0.064	0.25	0.997	0	0.599	-0.07
IEJ01_03215	NP_464157.1	lmo0630	-	transcriptional antiterminator BglG			0.53	0.25	0.993	0	0.71	-0.06
IEJ01_04325	NP_464379.1	lmo0853	-	SugE protein			0.322	0.25	0.932	0.02	0.955	0.01
IEJ01_01255	NP_463769.1	lmo0238	cysE	serine O-acetyltransferase			0.232	0.24	0.745	0.05	0.979	-0.01
IEJ01_10690	NP_465565.1	lmo2041	mraW	S-adenosyl-methyltransferase MraW	Yes		0.002	0.24	0.536	-0.07	0.1	-0.15
IEJ01_14760	NP_466318.1	lmo2796	-	transcriptional regulator			0.082	0.24	0.428	0.11	0.179	0.18
IEJ01_10660	NP_465559.1	lmo2035	murG	UDP-diphospho-muramoylpentapeptide beta-N-acetylglucosaminyltransferase			0.022	0.24	0.932	-0.02	0.619	0.06
IEJ01_09235	NP_465278.1	lmo1753	-	lipid kinase			0.045	0.24	0.684	0.06	0.043	0.24
IEJ01_10655	NP_465558.1	lmo2034	divIB	cell division protein FtsQ			0.002	0.24	0.899	-0.02	0.283	0.1
IEJ01_01645	NP_463846.1	lmo0316	-	hydroxyethylthiazole kinase			0.574	0.24	0.998	0	0.885	-0.02
IEJ01_08415	NP_465139.1	lmo1614	-	hypothetical protein lmo1614			0.117	0.24	0.372	-0.13	0.519	-0.1
IEJ01_04330	NP_464380.1	lmo0854	-	SugE protein			0.201	0.24	0.256	0.18	0.396	0.14
IEJ01_06775	NP_464814.1	lmo1289	-	internalin			0.227	0.24	0.989	0	0.862	0.03
IEJ01_00975	NP_463728.1	lmo0197	-	regulatory protein SpoVG			0.03	0.24	0.978	-0.01	0.567	-0.07
IEJ01_10790	NP_465585.1	lmo2061	-	hypothetical protein lmo2061			0.1	0.24	0.486	-0.1	0.603	-0.08
IEJ01_07985	NP_465054.1	lmo1529	-	hypothetical protein lmo1529			0.03	0.24	0.004	0.33	0.001	0.36
IEJ01_10275	NP_465482.1	lmo1958	fhuB	ferrichrome ABC transporter permease			0.251	0.24	0.792	-0.04	0.808	-0.04
IEJ01_05675	NP_464660.1	lmo1135	-	hypothetical protein lmo1135			0.029	0.24	0.996	0	0.17	0.16
IEJ01_05685	NP_464662.1	lmo1137	-	hypothetical protein lmo1137			0.206	0.24	0.848	-0.04	0.899	-0.02
IEJ01_10065	NP_465440.1	lmo1916	-	peptidase			0.076	0.24	0.99	0	0.894	-0.02
IEJ01_04975	NP_464501.1	lmo0976	-	hypothetical protein lmo0976			0.057	0.24	0.449	0.11	0.192	0.17
IEJ01_00120	NP_463557.1	lmo0024	-	PTS mannose transporter subunit IID			0.703	0.24		-0.02		-0.01
IEJ01_04435	NP_464400.1	lmo0874	-	PTS sugar transporter subunit IIA			0.678	0.24		0.01		-0.01
IEJ01_07450	NP_464948.1	lmo1423	-	hypothetical protein lmo1423			0.156	0.24	0.569	-0.09	0.178	0.21
IEJ01_10140	NP_465455.1	lmo1931	ubiE	ubiquinone/menaquinone biosynthesis methyltransferase			0.028	0.24	0.057	-0.21	0	-0.39
IEJ01_14455	NP_466259.1	lmo2737	-	LacI family transcriptional regulator			0.06	0.24	0.386	-0.12	0.217	-0.16
IEJ01_12540	NP_465902.1	lmo2379	-	monovalent cation/H+ antiporter subunit B			0.173	0.24	0.7	-0.06	0.681	0.07
IEJ01_10285	NP_465484.1	lmo1960	fhuC	ferrichrome ABC transporter ATP-binding protein			0.001	0.24	0.008	-0.21	0.117	-0.13
IEJ01_02750	NP_464065.1	lmo0537	-	allantoate amidohydrolase			0.015	0.24	0.584	-0.07	0.767	0.04
IEJ01_09630	NP_465354.1	lmo1829	-	fibronectin-binding proteins			0.009	0.24	0.815	-0.04	0.348	-0.1
IEJ01_14860	NP_466337.1	lmo2815	fabG	3-ketoacyl-ACP reductase			0.162	0.24	0.784	-0.05	0.412	0.13
IEJ01_05755	NP_464676.1	lmo1151	-	PduA protein			0.686	0.24		0		0.02
IEJ01_06855	NP_464830.1	lmo1305	tkt	transketolase			0.004	0.24	0.359	0.1	0.861	-0.02
IEJ01_05570	NP_464620.1	lmo1095	-	PTS cellbiose transporter subunit IIB			0.034	0.23	0.024	-0.26	0.057	-0.21
IEJ01_05170	NP_464540.1	lmo1015	gbuB	glycine/betaine ABC transporter permease	Yes		0.052	0.23	0.427	-0.11	0.053	-0.23
IEJ01_14845	NP_466334.1	lmo2812	-	D-alanyl-D-alanine carboxypeptidase			0.453	0.23	0.776	0.04	0.538	0.1
IEJ01_10465	NP_465520.1	lmo1996	-	DeoR family transcriptional regulator			0.104	0.23	0.597	0.08	0.281	0.15
IEJ01_14230	NP_466214.1	lmo2692	-	hypothetical protein lmo2692			0.062	0.23	0.55	0.09	0.852	0.03
IEJ01_05365	NP_464579.1	lmo1054	pdhC	dihydrolipoamide acetyltransferase			0.021	0.23	0.865	0.03	0.737	-0.04
IEJ01_12655	NP_465924.1	lmo2401	-	hypothetical protein lmo2401			0.001	0.23	0.915	0.02	0.047	0.15
IEJ01_12595	NP_465913.1	lmo2390	-	hypothetical thioredoxine reductase			0.003	0.23	0.341	-0.1	0.182	-0.12
IEJ01_07510	NP_464960.1	lmo1435	dapA	dihydrodipicolinate synthase	Yes		0.014	0.23	0.867	0.03	0.777	-0.03
IEJ01_07455	NP_464949.1	lmo1424	-	manganese transporter			0.085	0.23	0.653	-0.07	0.8	-0.04
IEJ01_06130	NP_464751.1	lmo1226	-	transporter			0.03	0.23	0.566	-0.08	0.279	-0.12
IEJ01_04495	NP_464412.1	lmo0886	dal	alanine racemase			0.015	0.23	0.983	-0.01	0.382	-0.09
IEJ01_01680	NP_463853.1	lmo0323	-	hypothetical protein lmo0323			0.344	0.23	0.996	0	0.373	-0.15
IEJ01_02725	NP_464060.1	lmo0532	-	hypothetical protein lmo0532			0.214	0.23	0.597	0.08	0.768	-0.05
IEJ01_11745	NP_465769.1	lmo2245	-	hypothetical protein lmo2245			0.104	0.23	0.902	-0.02	0.456	-0.1
IEJ01_11435	NP_465707.1	lmo2183	-	ferrichrome ABC transporter permease			0.113	0.23	0.141	-0.2	0.134	-0.21
IEJ01_10800	NP_465587.1	lmo2063	-	hypothetical protein lmo2063			0.098	0.23	0	0.5	0	0.48
IEJ01_13915	NP_466166.1	lmo2643	-	hypothetical protein lmo2643			0.036	0.22	0.071	0.2	0.189	0.15
IEJ01_10585	NP_465544.1	lmo2020	divIVA	chemotaxis protein CheY			0.007	0.22	0.004	0.26	0.001	0.28
IEJ01_07360	NP_464930.1	lmo1405	-	anti-terminator regulatory protein			0.024	0.22	0.123	0.17	0	0.35
IEJ01_06610	NP_464781.1	lmo1256	-	hypothetical protein lmo1256			0.29	0.22	0.782	0.05	0.71	-0.06
IEJ01_05230	NP_464552.1	lmo1027	-	hypothetical protein lmo1027			0.064	0.22	0.996	0	0.391	0.11
IEJ01_13290	NP_466050.1	lmo2527	-	hypothetical protein lmo2527			0.415	0.22	0.982	-0.01	0.265	-0.2
IEJ01_01730	NP_463865.1	lmo0335	-	hypothetical protein lmo0335			0.605	0.22	0.301	0.11	0.68	-0.06
IEJ01_02160	NP_463949.1	lmo0420	-	hypothetical protein lmo0420			0.364	0.22	0.996	0	0.488	-0.12
IEJ01_05315	NP_464569.1	lmo1044	-	molybdopterin converting factor subunit 2			0.409	0.22	0.21	-0.2	0.499	-0.11
IEJ01_05330	NP_464572.1	lmo1047	moaA	molybdenum cofactor biosynthesis protein A			0.19	0.22	0.68	-0.07	0.228	-0.18
IEJ01_02405	NP_463996.1	lmo0467	-	hypothetical protein lmo0467			0.367	0.22	0.99	0	0.576	-0.1
IEJ01_12750	NP_465943.1	lmo2420	-	hypothetical protein lmo2420			0.101	0.22	0.832	-0.04	0.702	0.06
IEJ01_06045	NP_464734.1	lmo1209	-	hypothetical protein lmo1209			0.112	0.22	0.487	0.1	0.187	0.18
IEJ01_08905	NP_465213.1	lmo1688	-	enoyl-ACP reductase			0.154	0.22	0.9	-0.02	0.959	-0.01
IEJ01_09160	NP_465263.1	lmo1738	-	amino acid ABC transporter substrate-binding protein			0.253	0.22	0.175	-0.22	0.378	-0.14
IEJ01_11640	NP_465748.1	lmo2224	-	hypothetical protein lmo2224			0.077	0.22	0.52	-0.09	0.049	0.24
IEJ01_05290	NP_464564.1	lmo1039	-	ABC transporter ATP-binding protein			0.11	0.22	0.282	-0.15	0.051	-0.26
IEJ01_11755	NP_465771.1	lmo2247	-	oxidoreductase			0.099	0.22	0.873	0.03	0.279	-0.14
IEJ01_11040	NP_465633.1	lmo2109	-	hydrolase			0.129	0.22	0.771	-0.05	0.286	0.15
IEJ01_00365	NP_463607.1	lmo0074	-	hypothetical protein lmo0074			0.376	0.22	0.731	0.06	0.671	-0.07
IEJ01_12080	NP_465839.1	lmo2315	-	hypothetical protein lmo2315			0.692	0.22	0.98	0	0.653	-0.05
IEJ01_05840	NP_464693.1	lmo1168	AckA2	acetate kinase	Yes		0.116	0.22	0.49	0.1	0.003	0.38
IEJ01_13285	NP_466049.1	lmo2526	murA	UDP-N-acetylglucosamine 1-carboxyvinyltransferase			0.005	0.22	0.819	0.03	0.598	0.05
IEJ01_06030	NP_464731.1	lmo1206	cbiQ	cobalamin biosynthesis protein CbiQ			0.473	0.22	0.698	-0.06	0.946	0.01
IEJ01_05385	NP_464583.1	lmo1058	-	hypothetical protein lmo1058			0.089	0.21	0.514	-0.09	0.502	-0.09
IEJ01_12735	NP_465940.1	lmo2417	-	ABC transporter substrate-binding protein			0.055	0.21	0.091	-0.2	0.217	-0.15
IEJ01_01350	NP_463788.1	lmo0257	-	hypothetical protein lmo0257			0.094	0.21	0.952	-0.01	0.979	0
IEJ01_12095	WP_003731837.1			hypothetical protein			0.689	0.21		-0.01		-0.01
IEJ01_05215	NP_464549.1	lmo1024	-	hypothetical protein lmo1024			0.171	0.21	0.952	0.01	0.859	-0.03
IEJ01_03245	NP_464163.1	lmo0636	-	hypothetical protein lmo0636			0.277	0.21	0.395	0.13	0.547	0.1
IEJ01_09270	NP_465285.1	lmo1760	-	geranylgeranylglyceryl phosphate synthase-like protein			0.154	0.21	0.334	0.14	0.147	0.21
IEJ01_05140	NP_464534.1	lmo1009	-	hypothetical protein lmo1009			0.017	0.21	0.106	0.16	0.133	0.15
IEJ01_10190	NP_465465.1	lmo1941	-	hypothetical protein lmo1941			0.012	0.21	0.139	0.14	0	0.45
IEJ01_10215	NP_465470.1	lmo1946	-	acyl-CoA hydrolase			0.052	0.21	0.477	0.09	0.551	0.07
IEJ01_03435	NP_464200.1	lmo0673	-	hypothetical protein lmo0673			0.015	0.21	0.956	-0.01	0.902	-0.01
IEJ01_09935	NP_465414.1	lmo1890	-	hypothetical protein lmo1890			0.18	0.21	0.909	-0.03	0.139	0.21
IEJ01_02500	NP_464015.1	lmo0487	-	hypothetical protein lmo0487			0.043	0.21	0.454	0.09	0.189	0.14
IEJ01_09810	NP_465390.1	lmo1865	-	hypothetical protein lmo1865			0.172	0.21	0.9	-0.02	0.788	-0.04
IEJ01_03730	NP_464260.1	lmo0733	-	transcriptional regulator			0.037	0.21	0.786	0.04	0.064	0.19
IEJ01_01470	NP_463812.1	lmo0281	-	hypothetical protein lmo0281			0.064	0.21	0.14	-0.18	0.356	0.11
IEJ01_14270	NP_466222.1	lmo2700	-	aldo/keto reductase			0.011	0.21	0.017	0.21	0.003	0.24
IEJ01_14935	NP_466352.1	lmo2830	-	thioredoxin			0.149	0.2	0.596	0.08	0.738	-0.05
IEJ01_05390	NP_464584.1	lmo1059	-	hypothetical protein lmo1059			0.116	0.2	0.841	0.03	0.774	0.04
IEJ01_07295	NP_464917.1	lmo1392	-	peptidase			0.034	0.2	0.486	-0.09	0.064	-0.18
IEJ01_10685	NP_465564.1	lmo2040	ftsL	cell division protein FtsL			0.034	0.2	0.62	0.07	0.354	-0.1
IEJ01_02020	NP_463921.1	lmo0391	-	hypothetical protein lmo0391			0.259	0.2	0.5	0.11	0.446	-0.12
IEJ01_00465	NP_463626.1	lmo0093	-	ATP synthase subunit epsilon			0.684	0.2	0.696	-0.04	0.617	-0.06
IEJ01_08125	NP_465082.1	lmo1557	hemA	glutamyl-tRNA reductase			0.004	0.2	0.038	-0.16	0.182	-0.11
IEJ01_06890	NP_464837.1	lmo1312	-	hypothetical protein lmo1312			0.378	0.2	0.731	0.06	0.015	0.46
IEJ01_06095	NP_464744.1	lmo1219	-	hypothetical protein lmo1219			0.176	0.2	0	0.61	0	0.6
IEJ01_08680	NP_465192.1	lmo1667	-	L-lactate dehydrogenase			0.3	0.2	0.398	-0.13	0.228	-0.2
IEJ01_02525	NP_464020.1	lmo0492	-	LysR family transcriptional regulator			0.103	0.2	0.739	0.05	0.224	0.15
IEJ01_01420	NP_463802.1	lmo0271	-	phospho-beta-glucosidase			0.019	0.2	0.001	0.28	0	0.31
IEJ01_08640	NP_465184.1	lmo1659	-	hypothetical protein lmo1659			0.16	0.2	0.608	0.08	0.878	0.03
IEJ01_09090	NP_465249.1	lmo1724	-	ABC transporter ATP-binding protein			0.435	0.2	0.773	0.05	0.667	0.08
IEJ01_08450	NP_465146.1	lmo1621	-	hypothetical protein lmo1621			0.113	0.2	0.538	-0.09	0	-0.45
IEJ01_14755	NP_466317.1	lmo2795	-	RpiR family transcription regulator			0.057	0.2	0.649	0.06	0.445	0.09
IEJ01_01595	NP_463837.1	lmo0306	-	hypothetical protein lmo0306			0.236	0.2	0.93	0.02	0.983	0
IEJ01_12800	NP_465953.1	lmo2430	-	ferrichrome ABC transporter permease			0.19	0.2	0.989	0	0.344	-0.14
IEJ01_06915	NP_464842.1	lmo1317	-	1-deoxy-D-xylulose 5-phosphate reductoisomerase			0.039	0.2	0.308	-0.12	0.072	-0.18
IEJ01_04980	NP_464502.1	lmo0977	-	hypothetical protein lmo0977			0.094	0.2	0.866	0.03	0.024	0.26
IEJ01_01530	NP_463824.1	lmo0293	-	rRNA large subunit methyltransferase			0.547	0.2	0.933	0.01	0.741	0.06
IEJ01_11205	NP_465661.1	lmo2137	-	PTS fructose transporter subunit IIA			0.738	0.2		0.01		-0.02
IEJ01_05370	NP_464580.1	lmo1055	PdhD	dihydrolipoamide dehydrogenase			0.036	0.2	0.419	0.09	0.741	0.04
IEJ01_04630	NP_464434.1	lmo0908	-	hypothetical protein lmo0908			0.008	0.19	0.745	0.04	0.328	-0.09
IEJ01_12960	NP_465985.1	lmo2462	-	dipeptidase			0.042	0.19	0.084	0.18	0.01	0.25
IEJ01_06555	NP_464772.1	lmo1247	-	hypothetical protein lmo1247			0.048	0.19	0.986	0.01	0.681	0.05
IEJ01_00260	NP_463585.1	lmo0052	-	hypothetical protein lmo0052			0.083	0.19	0.982	-0.01	0.2	-0.15
IEJ01_10645	NP_465556.1	lmo2032	ftsZ	cell division protein FtsZ			0.054	0.19	0.765	0.04	0.492	-0.08
IEJ01_06070	NP_464739.1	lmo1214	-	hypothetical protein lmo1214			0.322	0.19	0.981	-0.01	0.738	0.06
IEJ01_08085	NP_465074.1	lmo1549	radC	DNA repair protein RadC			0.458	0.19	0.9	0.02	0.734	0.06
IEJ01_05705	NP_464666.1	lmo1141	-	uroporphyrin-III C-methyltransferase			0.671	0.19	0.242	0.12	0.381	0.13
IEJ01_09570	NP_465342.1	lmo1817	-	hypothetical protein lmo1817			0.016	0.19	0.14	0.14	0.882	0.02
IEJ01_01120	NP_463757.1	lmo0226	folK	7,8-dihydro-6-hydroxymethylpterin pyrophosphokinase			0.095	0.19	0.791	0.04	0.922	0.01
IEJ01_06865	NP_464832.1	lmo1307	-	hypothetical protein lmo1307			0.107	0.19	0.295	0.13	0.073	0.21
IEJ01_00610	NP_463655.1	lmo0122	-	hypothetical protein lmo0122			0.408	0.19	0.816	0.04	0.004	0.57
IEJ01_13225	NP_466037.1	lmo2514	-	hypothetical protein lmo2514			0.041	0.19	0.873	0.03	0.247	0.12
IEJ01_03900	NP_464294.1	lmo0767	-	ABC transporter permease			0.728	0.19	0.957	-0.01	0.552	-0.07
IEJ01_05565	NP_464619.1	lmo1094	-	hypothetical protein lmo1094			0.065	0.19	0.338	-0.11	0.007	-0.27
IEJ01_05910	NP_464707.1	lmo1182	-	PduL protein			0.704	0.19	0.598	-0.05	0.85	0.03
IEJ01_04220	NP_464359.1	lmo0832	-	transposase			0.689	0.19	0.867	-0.02	0.159	0.24
IEJ01_10600	NP_465547.1	lmo2023	nadB	L-aspartate oxidase			0.629	0.19	0.292	-0.12	0.502	-0.1
IEJ01_01015	NP_463736.1	lmo0205	plcB	phospholipase C			0.477	0.18	0.963	-0.01	0.991	0
IEJ01_07835	NP_465025.1	lmo1500	-	hypothetical protein lmo1500			0.069	0.18	0.221	0.14	0.008	0.26
IEJ01_14220	NP_466212.1	lmo2690	-	TetR family transcriptional regulator			0.284	0.18	0.4	0.12	0.001	0.48
IEJ01_04885	NP_464484.1	lmo0959	-	undacaprenyl-phosphate N-acetylglucosaminyltransferase			0.091	0.18	0.18	0.15	0.184	0.15
IEJ01_10615	NP_465550.1	lmo2026	-	peptidoglycan binding protein			0.435	0.18	0.873	-0.03	0.873	-0.03
IEJ01_00535	NP_463640.1	lmo0107	-	ABC transporter ATP-binding protein			0.412	0.18	0.669	-0.07	0.971	-0.01
IEJ01_07950	NP_465047.1	lmo1522	-	D-tyrosyl-tRNA(Tyr) deacylase			0.243	0.18	0.996	0	0.631	0.07
IEJ01_04270	NP_464368.1	lmo0842	-	peptidoglycan binding protein			0.053	0.18	0.935	-0.01	0.182	0.13
IEJ01_05485	NP_464603.1	lmo1078	-	UDP-glucose pyrophosphorylase			0.039	0.18	0.001	0.29	0	0.3
IEJ01_05305	NP_464567.1	lmo1042	-	molybdopterin biosynthesis protein MoeA			0.185	0.18	0.83	-0.04	0	-0.5
IEJ01_11565	NP_465733.1	lmo2209	-	hypothetical protein lmo2209			0.056	0.18	0.017	0.23	0	0.43
IEJ01_08465	NP_465149.1	lmo1624	-	transporter			0.03	0.18	0.933	0.01	0	0.54
IEJ01_13675	NP_466118.1	lmo2595	-	hypothetical protein lmo2595			0.403	0.17	0.9	-0.03	0.462	0.12
IEJ01_02015	NP_463920.1	lmo0390	-	uracil-DNA glycosylase			0.255	0.17	0.929	-0.02	0.19	-0.18
IEJ01_10885	NP_465604.1	lmo2080	-	hypothetical protein lmo2080			0.198	0.17	0.005	0.36	0	0.44
IEJ01_10060	NP_465439.1	lmo1915	-	malate dehydrogenase			0.187	0.17	0.974	-0.01	0.456	-0.1
IEJ01_01400	NP_463798.1	lmo0267	-	hypothetical protein lmo0267			0.137	0.17	0.207	-0.16	0.17	-0.16
IEJ01_13055	NP_466003.1	lmo2480	-	acetyltransferase			0.147	0.17	0.589	0.08	0.107	0.19
IEJ01_11240	NP_465668.1	lmo2144	-	GntR family transcriptional regulator			0.193	0.17	0.13	0.2	0.566	0.08
IEJ01_12790	NP_465951.1	lmo2428	-	cell division protein FtsW			0.154	0.17	0.816	-0.04	0.192	0.16
IEJ01_12825	NP_465958.1	lmo2435	-	hypothetical protein lmo2435			0.549	0.17	0.839	0.03	0.669	0.07
IEJ01_03050	NP_464125.1	lmo0597	-	Crp/Fnr family transcriptional regulator			0.209	0.17	0.535	-0.09	0.373	0.12
IEJ01_07975	NP_465052.1	lmo1527	-	preprotein translocase SecDF			0.001	0.17	0.426	0.06	0.83	-0.02
IEJ01_11025	NP_465630.1	lmo2106	-	hypothetical protein lmo2106			0.293	0.17	0.893	0.03	0.957	0.01
IEJ01_10595	NP_465546.1	lmo2022	-	carbon-sulfur lyase			0.439	0.17	0.787	0.05	0.94	-0.01
IEJ01_07020	NP_464863.1	lmo1338	-	hypothetical protein lmo1338			0.379	0.17	0.99	0	0.895	-0.02
IEJ01_09285	NP_465288.1	lmo1763	-	hypothetical protein lmo1763			0.09	0.16	0.256	0.13	0.05	0.19
IEJ01_05160	NP_464538.1	lmo1013	-	hypothetical protein lmo1013			0.056	0.16	0.29	0.11	0.246	0.12
IEJ01_09645	NP_465357.1	lmo1832	pyrF	orotidine 5\'-phosphate decarboxylase	Yes		0.18	0.16	0.726	0.06	0.282	-0.13
IEJ01_12665	NP_465926.1	lmo2403	-	hypothetical protein lmo2403			0.162	0.16	0.893	-0.02	0.657	0.06
IEJ01_09940	NP_465415.1	lmo1891	recU	Holliday junction-specific endonuclease			0.168	0.16	0.842	0.05	0.003	0.33
IEJ01_05890	NP_464703.1	lmo1178	-	carboxysome structural protein			0.779	0.16	0.697	-0.03		0.07
IEJ01_01075	NP_463748.1	lmo0217	-	DivIC protein			0.257	0.16	0.89	0.03	0.479	0.1
IEJ01_14515	NP_466271.1	lmo2749	-	glutamine amidotransferase			0.363	0.16	0.98	-0.01	0.258	0.17
IEJ01_03125	NP_464139.1	lmo0612	-	MarR family transcriptional evidence			0.465	0.16	0.151	-0.24	0.159	-0.24
IEJ01_02005	NP_463918.1	lmo0388	-	hypothetical protein lmo0388	Yes		0.084	0.16	0.929	0.02	0.655	0.05
IEJ01_05165	NP_464539.1	lmo1014	gbuA	glycine/betaine ABC transporter ATP-binding protein			0.139	0.16	0.736	-0.05	0.348	-0.11
IEJ01_08445	NP_465145.1	lmo1620	-	dipeptidase PepV			0.004	0.16	0.262	-0.08	0.006	-0.16
IEJ01_10000	NP_465427.1	lmo1903	-	thioredoxin			0.262	0.16	0.454	-0.11	0.465	0.1
IEJ01_03890	NP_464292.1	lmo0765	-	hypothetical protein lmo0765			0.703	0.16	0.733	0.04	0.699	0.06
IEJ01_13565	NP_466103.1	lmo2580	-	ABC transporter ATP-binding protein			0.617	0.16	0.653	-0.06	0.906	-0.02
IEJ01_13920	NP_466167.1	lmo2644	-	hypothetical protein lmo2644			0.19	0.16	0.057	0.23	0.121	0.18
IEJ01_02210	NP_463959.1	lmo0430	-	LysR family transcriptional regulator			0.153	0.16	0.124	-0.18	0.867	0.02
IEJ01_04060	NP_464326.1	lmo0799	-	hypothetical protein lmo0799			0.186	0.16	0.454	-0.1	0.413	0.1
IEJ01_12780	NP_465949.1	lmo2426	-	hypothetical protein lmo2426			0.136	0.16	0.197	-0.15	0	-0.37
IEJ01_09455	NP_465319.1	lmo1794	-	hypothetical protein lmo1794			0.196	0.16	0.856	0.03	0.913	0.02
IEJ01_07015	NP_464862.1	lmo1337	-	hypothetical protein lmo1337			0.144	0.15	0.765	0.05	0.349	0.11
IEJ01_00315	NP_463596.1	lmo0063	-	hypothetical protein lmo0063			0.811	0.15		0		-0.01
IEJ01_13025	NP_465997.1	lmo2474	-	hypothetical protein lmo2474			0.041	0.15	0.956	0.01	0.066	-0.15
IEJ01_11045	NP_465634.1	lmo2110	-	mannnose-6 phospate isomerase			0.086	0.15	0.57	0.07	0.855	0.02
IEJ01_10865	NP_465600.1	lmo2076	-	alanine acetyltransferase			0.445	0.15	0.993	0	0.087	-0.28
IEJ01_10080	NP_465443.1	lmo1919	-	hypothetical protein lmo1919			0.151	0.15	0.697	0.06	0.89	0.02
IEJ01_04370	NP_464388.1	lmo0862	-	oligo-1,6-glucosidase			0.747	0.15	0.811	0.03	0.33	-0.13
IEJ01_05155	NP_464537.1	lmo1012	-	N-acyl-L-amino acid amidohydrolase			0.031	0.15	0.727	-0.04	0.117	-0.13
IEJ01_04080	NP_464330.1	lmo0803	-	Na+/H+ antiporter			0.038	0.15	0.647	0.05	0.625	-0.05
IEJ01_14575	YP_008475646.1	lmo2760a	-	hypothetical protein lmo2760a			0.334	0.15	0.095	0.24	0.071	0.25
IEJ01_09640	NP_465356.1	lmo1831	pyrE	orotate phosphoribosyltransferase	Yes		0.184	0.15	0.445	0.1	0.163	-0.16
IEJ01_08385	NP_465133.1	lmo1608	-	hypothetical protein lmo1608			0.133	0.15	0.49	-0.08	0.048	-0.2
IEJ01_11730	NP_465766.1	lmo2242	-	O6-methylguanine-DNA methyltransferase			0.391	0.15	0.131	0.23	0.893	0.02
IEJ01_13065	NP_466005.1	lmo2482	lgt	prolipoprotein diacylglyceryl transferase			0.154	0.15	0.619	-0.07	0.265	-0.12
IEJ01_09575	NP_465343.1	lmo1818	-	ribulose-phosphate 3-epimerase			0.097	0.15	0.974	0.01	0.228	-0.12
IEJ01_01620	NP_463841.1	lmo0311	-	hypothetical protein lmo0311			0.646	0.14	0.773	-0.04	0.028	-0.55
IEJ01_14490	NP_466266.1	lmo2744	-	Crp/Fnr family transcriptional regulator			0.1	0.14	0.782	-0.04	0.537	0.06
IEJ01_00505	NP_463634.1	lmo0101	-	transcriptional regulator			0.284	0.14	0.396	0.12	0.001	0.4
IEJ01_04930	NP_464493.1	lmo0968	ppnK	inorganic polyphosphate/ATP-NAD kinase			0.18	0.14	0.601	0.07	0.702	-0.05
IEJ01_14385	NP_466245.1	lmo2723	-	hypothetical protein lmo2723			0.451	0.14	0.271	0.17	0.265	0.17
IEJ01_10185	NP_465464.1	lmo1940	-	asparaginase			0.207	0.14	0.877	-0.03	0.159	0.16
IEJ01_08580	NP_465172.1	lmo1647	-	1-acylglycerol-3-phosphate O-acyltransferase			0.143	0.14	0.007	0.26	0.009	0.25
IEJ01_12795	NP_465952.1	lmo2429	-	ferrichrome ABC transporter ATP-binding protein			0.186	0.14	0.989	0	0.389	-0.1
IEJ01_13060	NP_466004.1	lmo2481	-	pyrophosphatase PpaX			0.14	0.14	0.989	0	0.205	-0.13
IEJ01_10355	NP_465498.1	lmo1974	-	GntR family transcriptional regulator			0.313	0.14	0.942	0.02	0.028	0.28
IEJ01_12535	NP_465901.1	lmo2378	-	monovalent cation/H+ antiporter subunit A			0.358	0.14	0.852	0.03	0.252	0.16
IEJ01_03910	NP_464296.1	lmo0769	-	alpha-1,6-mannanase			0.71	0.14	0.9	0.02	0.929	0.02
IEJ01_07190	NP_464897.1	lmo1372	-	branched-chain alpha-keto acid dehydrogenase subunit E1			0.124	0.14	0.967	-0.01	0.982	0
IEJ01_06650	NP_464789.1	lmo1264	-	hypothetical protein lmo1264			0.813	0.14	0.995	0		-0.06
IEJ01_06015	NP_464728.1	lmo1203	cbiL	cobalt-precorrin-2 C(20)-methyltransferase			0.763	0.14	0.952	0.01	0.995	0
IEJ01_08380	NP_465132.1	lmo1607	pheT	phenylalanyl-tRNA synthetase subunit beta			0.08	0.14	0.671	0.05	0.523	0.06
IEJ01_05350	NP_464576.1	lmo1051	def	peptide deformylase			0.226	0.14	0.213	0.15	0.855	-0.03
IEJ01_09665	NP_465361.1	lmo1836	pyrAa	carbamoyl phosphate synthase small subunit	Yes		0.517	0.14	0.694	-0.06	0.767	-0.05
IEJ01_07200	NP_464899.1	lmo1374	-	branched-chain alpha-keto acid dehydrogenase subunit E2			0.067	0.14	0.737	0.04	0.735	0.03
IEJ01_12085	WP_014930674.1			class I SAM-dependent methyltransferase			0.819	0.14	0.683	0.03		-0.05
IEJ01_11515	NP_465723.1	lmo2199	-	hypothetical protein lmo2199			0.294	0.14	0	-0.48	0.013	-0.3
IEJ01_09280	NP_465287.1	lmo1762	-	hypothetical protein lmo1762			0.285	0.14	0.446	0.1	0.444	0.1
IEJ01_00335	NP_463600.1	lmo0067	-	dinitrogenase reductase ADP-ribosylation protein			0.421	0.13	0.946	0.02	0.681	-0.06
IEJ01_01600	NP_463838.1	lmo0307	-	hypothetical protein lmo0307			0.52	0.13	0.76	0.05	0.98	0
IEJ01_00295	NP_463592.1	lmo0059	-	hypothetical protein lmo0059			0.843	0.13		0.01		0.03
IEJ01_06050	NP_464735.1	lmo1210	-	hypothetical protein lmo1210			0.259	0.13	0.84	0.03	0.442	0.1
IEJ01_14155	NP_466201.1	lmo2679	-	histidine kinase			0.343	0.13	0.946	0.01	0.664	0.06
IEJ01_00540	NP_463641.1	lmo0108	-	ABC transporter ATP-binding protein			0.512	0.13	0.821	0.04	0.244	0.18
IEJ01_14630	NP_466293.1	lmo2771	-	beta-glucosidase			0.646	0.13	0.806	0.04	0.513	-0.11
IEJ01_05210	NP_464548.1	lmo1023	-	potassium transporter			0.201	0.13	0.573	0.07	0.539	0.07
IEJ01_05375	NP_464581.1	lmo1056	-	hypothetical protein lmo1056			0.382	0.13	0.181	0.18	0.086	0.23
IEJ01_11570	NP_465734.1	lmo2210	-	hypothetical protein lmo2210			0.538	0.13	0.148	-0.23	0	-2.43
IEJ01_02305	YP_008475628.1	lmo0448a	-	hypothetical protein lmo0448a			0.809	0.13	0.996	0	0.653	-0.05
IEJ01_06735	NP_464806.1	lmo1281	-	hypothetical protein lmo1281			0.372	0.13	0.996	0	0.67	-0.06
IEJ01_02395	NP_463994.1	lmo0465	-	hypothetical protein lmo0465			0.572	0.13	0.99	0	0.258	0.19
IEJ01_10830	NP_465593.1	lmo2069	groES	co-chaperonin GroES			0.328	0.13	0.004	0.34	0.003	0.35
IEJ01_08470	NP_465150.1	lmo1625	-	transporter			0.265	0.13	0.025	0.25	0.022	0.25
IEJ01_07180	NP_464895.1	lmo1370	-	butyrate kinase			0.216	0.13	0.563	-0.07	0.942	0
IEJ01_01210	NP_463760.1	lmo0229	-	CtsR family transcriptional regulator			0.521	0.13	0.989	0	0.224	0.19
IEJ01_13205	NP_466033.1	lmo2510	secA	preprotein translocase subunit SecA			0.125	0.12	0.645	0.06	0.617	0.05
IEJ01_05595	NP_464644.1	lmo1119	-	methylase			0.246	0.12	0.99	0	0.625	0.06
IEJ01_01105	NP_463754.1	lmo0223	cysK	cysteine synthase			0.144	0.12	0.566	0.07	0.098	-0.15
IEJ01_10055	NP_465438.1	lmo1914	-	hypothetical protein lmo1914			0.211	0.12	0.76	-0.04	0.045	0.2
IEJ01_08005	NP_465058.1	lmo1533	ruvA	Holliday junction DNA helicase RuvA			0.131	0.12	0.356	-0.09	0.98	0
IEJ01_04900	NP_464487.1	lmo0962	lemA	LemA protein			0.195	0.12	0	0.41	0	0.51
IEJ01_06995	NP_464858.1	lmo1333	-	hypothetical protein lmo1333			0.171	0.12	0	0.32	0	0.67
IEJ01_04380	NP_464390.1	lmo0864	-	hypothetical protein lmo0864			0.669	0.12	0.255	0.18	0.405	0.14
IEJ01_02510	NP_464017.1	lmo0489	-	NADH:flavin oxidoreductase			0.56	0.12	0.3	0.16	0.022	0.39
IEJ01_01815	NP_463882.1	lmo0352	-	DeoR family transcriptional regulator			0.28	0.12	0.284	0.13	0.002	0.32
IEJ01_07995	NP_465056.1	lmo1531	queA	S-adenosylmethionine:tRNA ribosyltransferase-isomerase			0.108	0.12	0.428	-0.08	0.218	-0.1
IEJ01_07415	NP_464941.1	lmo1416	-	hypothetical protein lmo1416			0.365	0.12	0.981	-0.01	0.591	-0.07
IEJ01_05310	NP_464568.1	lmo1043	-	molybdopterin-guanine dinucleotide biosynthesis MobB			0.631	0.12	0.745	-0.05	0.076	-0.33
IEJ01_05650	NP_464655.1	lmo1130	-	transcriptional regulator			0.684	0.12	0.802	0.04	0.686	-0.07
IEJ01_14285	NP_466225.1	lmo2703	-	hypothetical protein lmo2703			0.208	0.12	0.546	0.08	0.448	-0.08
IEJ01_03355	NP_464184.1	lmo0657	-	hypothetical protein lmo0657			0.313	0.12	0.403	0.11	0.881	-0.02
IEJ01_07425	NP_464943.1	lmo1418	-	hypothetical protein lmo1418			0.343	0.12	0.669	-0.06	0.316	-0.12
IEJ01_00710	NP_463675.1	lmo0142	-	hypothetical protein lmo0142			0.73	0.11	0.567	0.08	0.734	0.06
IEJ01_05335	NP_464573.1	lmo1048	-	molybdenum cofactor biosynthesis protein B			0.575	0.11	0.786	0.05	0.916	0.02
IEJ01_05665	NP_464658.1	lmo1133	-	hypothetical protein lmo1133			0.856	0.11	0.452	0.05		0.05
IEJ01_04210	NP_464357.1	lmo0830	fbp	fructose-1,6-bisphosphatase			0.509	0.11	0.369	0.13	0.073	0.25
IEJ01_13120	NP_466016.1	lmo2493	-	ArsR family transcriptional regulator			0.548	0.11	0.356	0.14	0.229	0.18
IEJ01_05745	NP_464674.1	lmo1149	-	alpha-ribazole-5\'-phosphatase			0.869	0.11		0		0
IEJ01_08260	NP_465109.1	lmo1584	-	hypothetical protein lmo1584			0.302	0.11	0.057	0.2	0.254	0.12
IEJ01_10665	NP_465560.1	lmo2036	murD	UDP-N-acetylmuramoyl-L-alanyl-D-glutamate synthetase			0.29	0.11	0.466	-0.09	0.157	-0.15
IEJ01_08390	NP_465134.1	lmo1609	-	thioredoxin			0.338	0.11	0.158	-0.17	0.002	-0.33
IEJ01_06740	NP_464807.1	lmo1282	-	hypothetical protein lmo1282			0.539	0.11	0.955	0.01	0.702	0.06
IEJ01_06595	NP_464778.1	lmo1253	-	GntR family transcriptional regulator			0.216	0.11	0.139	0.14	0.011	0.22
IEJ01_01110	NP_463755.1	lmo0224	sul	dihydropteroate synthases			0.413	0.11	0.577	-0.08	0.093	-0.21
IEJ01_11785	NP_465777.1	lmo2253	-	phosphoglucomutase			0.432	0.11	0.02	0.29	0.286	0.14
IEJ01_04315	NP_464377.1	lmo0851	-	hypothetical protein lmo0851			0.15	0.11	0.219	-0.11	0.056	-0.15
IEJ01_00345	NP_463602.1	lmo0069	-	hypothetical protein lmo0069			0.648	0.11	0.495	0.11	0.453	-0.13
IEJ01_13570	NP_466104.1	lmo2581	-	hypothetical protein lmo2581			0.698	0.1	0.932	-0.02	0.566	-0.1
IEJ01_01590	NP_463836.1	lmo0305	-	L-allo-threonine aldolase			0.708	0.1	0.247	-0.18	0.019	-0.53
IEJ01_07760	NP_465010.1	lmo1485	-	hypothetical protein lmo1485			0.453	0.1	0.454	0.1	0.005	0.34
IEJ01_12365	NP_465885.1	lmo2362	-	amino acid antiporter			0.758	0.1	0.745	-0.04	0.375	-0.15
IEJ01_07165	NP_464892.1	lmo1367	-	arginine repressor ArgR	Yes		0.378	0.1	0.52	0.09	0.467	0.09
IEJ01_10090	NP_465445.1	lmo1921	-	hypothetical protein lmo1921			0.341	0.1	0.329	-0.11	0.386	-0.1
IEJ01_10120	NP_465451.1	lmo1927	aroB	3-dehydroquinate synthase			0.365	0.1	0.512	-0.09	0.045	-0.21
IEJ01_08610	NP_465178.1	lmo1653	-	cellsurface protein			0.69	0.1	0.992	0	0.883	-0.03
IEJ01_00755	NP_463684.1	lmo0151	-	hypothetical protein lmo0151			0.631	0.1	0.961	-0.01	0.456	0.12
IEJ01_05045	NP_464515.1	lmo0990	-	hypothetical protein lmo0990			0.592	0.1	0.433	-0.12	0.018	-0.38
IEJ01_07430	NP_464944.1	lmo1419	-	hypothetical protein lmo1419			0.292	0.1	0.58	-0.07	0.106	-0.15
IEJ01_08555	NP_465167.1	lmo1642	-	sigma factor regulator			0.272	0.1	0.698	0.05	0.356	0.09
IEJ01_10755	NP_465578.1	lmo2054	-	hypothetical protein lmo2054			0.419	0.1	0.097	0.2	0.756	0.04
IEJ01_13660	NP_466115.1	lmo2592	-	aldo/keto reductase			0.534	0.1	0.929	0.02	0.845	-0.03
IEJ01_03765	NP_464267.1	lmo0740	-	transcriptional regulator			0.511	0.1	0.857	0.03	0.633	0.07
IEJ01_10030	NP_465433.1	lmo1909	-	hypothetical protein lmo1909			0.397	0.1	0.796	-0.04	0.568	0.07
IEJ01_00595	NP_463652.1	lmo0119	-	hypothetical protein lmo0119			0.778	0.1	0.61	0.07	0.02	0.6
IEJ01_03935	NP_464301.1	lmo0774	-	hypothetical protein lmo0774			0.366	0.1	0.866	-0.03	0.027	-0.22
IEJ01_07435	NP_464945.1	lmo1420	murB	UDP-N-acetylenolpyruvoylglucosamine reductase			0.481	0.1	0.452	-0.1	0.2	-0.16
IEJ01_13990	NP_466180.1	lmo2658	-	acyltransferase			0.426	0.1	0.042	0.23	0.008	0.29
IEJ01_07895	NP_465037.1	lmo1512	mnmA	tRNA-specific 2-thiouridylase			0.494	0.1	0.05	-0.24	0.17	-0.17
IEJ01_03185	NP_464151.1	lmo0624	-	hypothetical protein lmo0624			0.513	0.1	0.695	0.06	0.263	0.15
IEJ01_04925	NP_464492.1	lmo0967	-	hypothetical protein lmo0967			0.369	0.1	0.828	0.03	0.713	-0.04
IEJ01_11245	NP_465669.1	lmo2145	-	hypothetical protein lmo2145			0.466	0.09	0.863	-0.03	0.616	0.07
IEJ01_08460	NP_465148.1	lmo1623	-	hypothetical protein lmo1623			0.491	0.09	0.922	0.02	0	0.55
IEJ01_01260	NP_463770.1	lmo0239	cysS	cysteinyl-tRNA synthetase			0.54	0.09	0.411	-0.12	0.168	-0.19
IEJ01_12745	NP_465942.1	lmo2419	-	ABC transporter ATP-binding protein			0.325	0.09	0.353	-0.1	0.738	-0.04
IEJ01_12605	NP_465915.1	lmo2392	-	hypothetical protein lmo2392			0.731	0.09	0.094	-0.33	0.24	-0.21
IEJ01_01545	NP_463827.1	lmo0296	-	hypothetical protein lmo0296			0.591	0.09	0.112	-0.24	0	-0.52
IEJ01_08070	NP_465071.1	lmo1546	mreD	cell-shape determining protein MreD			0.269	0.09	0.171	-0.12	0.005	-0.22
IEJ01_00275	NP_463588.1	lmo0055	purA	adenylosuccinate synthetase			0.41	0.09	0.144	0.17	0.069	0.19
IEJ01_14140	NP_464627.1	lmo1102	-	cadmium efflux system accessory protein			0.583	0.09	0.774	-0.05	0.139	0.21
IEJ01_01515	NP_463821.1	lmo0290	-	hypothetical protein lmo0290			0.302	0.09	0.311	-0.11	0.022	-0.19
IEJ01_07750	NP_465008.1	lmo1483	comEB	competence protein ComEB			0.513	0.09	0.436	0.11	0.017	0.29
IEJ01_01280	NP_463774.1	lmo0243	sigH	RNA polymerase factor sigma-70			0.495	0.09	0.613	-0.07	0.283	0.13
IEJ01_10650	NP_465557.1	lmo2033	ftsA	cell division protein FtsA			0.242	0.09	0.611	-0.05	0.234	-0.1
IEJ01_09925	NP_465412.1	lmo1888	-	hypothetical protein lmo1888			0.284	0.09	0.021	-0.19	0.007	-0.21
IEJ01_06040	NP_464733.1	lmo1208	cbiP	cobyric acid synthase CbiP			0.487	0.09	0.983	0.01	0.127	0.18
IEJ01_03250	NP_464164.1	lmo0637	-	hypothetical protein lmo0637			0.716	0.09	0.649	0.07	0.503	0.11
IEJ01_08525	NP_465161.1	lmo1636	-	ABC transporter ATP-binding protein			0.376	0.09	0.064	-0.18	0.048	-0.19
IEJ01_02520	NP_464019.1	lmo0491	aroD	3-dehydroquinate dehydratase			0.685	0.09	0.037	0.37	0.326	0.16
IEJ01_09580	NP_465344.1	lmo1819	-	ribosome-associated GTPase			0.365	0.09	0.373	-0.1	0.086	-0.16
IEJ01_08515	NP_465159.1	lmo1634	-	bifunctional acetaldehyde-CoA/alcohol dehydrogenase			0.872	0.08	0.444	0.07	0.918	-0.01
IEJ01_00795	NP_463692.1	lmo0159	-	peptidoglycan binding protein			0.7	0.08	0.966	-0.01	0.003	0.52
IEJ01_10035	NP_465434.1	lmo1910	-	oxidoreductase			0.513	0.08	0.887	-0.03	0.35	0.11
IEJ01_03080	NP_464130.1	lmo0603	-	hypothetical protein lmo0603			0.574	0.08	0.05	0.26	0.003	0.37
IEJ01_12805	NP_465954.1	lmo2431	-	ferrichrome ABC transporter substrate-binding protein			0.519	0.08	0.957	0.01	0.185	-0.16
IEJ01_00180	NP_463569.1	lmo0036	-	putrescine carbamoyltransferase			0.77	0.08	0.655	-0.07	0.083	-0.34
IEJ01_09100	NP_465251.1	lmo1726	-	hypothetical protein lmo1726			0.426	0.08	0.847	0.03	0.043	0.19
IEJ01_11225	NP_465665.1	lmo2141	-	hypothetical protein lmo2141			0.562	0.08	0.765	-0.05	0.005	-0.34
IEJ01_04195	NP_464353.1	lmo0826	-	transporter			0.487	0.08	0.1	0.18	0.093	0.18
IEJ01_12035	WP_003734977.1			hypothetical protein			0.758	0.08	0.486	-0.1	0.071	-0.35
IEJ01_05455	NP_464597.1	lmo1072	pycA	pyruvate carboxylase			0.506	0.08	0.057	-0.21	0.349	-0.11
IEJ01_06055	NP_464736.1	lmo1211	-	hypothetical protein lmo1211			0.604	0.08	0.763	-0.05	0.933	0.01
IEJ01_11085	NP_465642.1	lmo2118	glmM	phosphoglucosamine mutase			0.303	0.08	0.155	0.12	0.671	0.04
IEJ01_10545	NP_465536.1	lmo2012	-	hypothetical protein lmo2012			0.889	0.08	0.129	-0.1	0.215	-0.14
IEJ01_00310	NP_463595.1	lmo0062	-	hypothetical protein lmo0062			0.905	0.08		-0.01		-0.02
IEJ01_10835	NP_465594.1	lmo2070	-	hypothetical protein lmo2070			0.428	0.08	0.659	0.06	0.336	0.1
IEJ01_07745	NP_465007.1	lmo1482	comEC	competence protein ComEC			0.674	0.08	0.773	0.05	0.001	0.49
IEJ01_08710	NP_465198.1	lmo1673	menB	naphthoate synthase			0.392	0.08	0.944	-0.01	0.793	-0.03
IEJ01_08885	NP_465209.1	lmo1684	-	glycerate dehydrogenase			0.519	0.08	0.023	-0.25	0.032	-0.23
IEJ01_11465	NP_465713.1	lmo2189	-	competence protein CoiA			0.644	0.08	0.053	-0.28	0.121	-0.22
IEJ01_06960	NP_464851.1	lmo1326	-	hypothetical protein lmo1326			0.444	0.07	0.346	0.1	0.737	0.04
IEJ01_09590	NP_465346.1	lmo1821	-	phosphoprotein phosphatase			0.495	0.07	0.771	-0.04	0.313	-0.11
IEJ01_10570	NP_465541.1	lmo2017	-	hypothetical protein lmo2017			0.453	0.07	0.979	0.01	0.35	0.1
IEJ01_04025	NP_464319.1	lmo0792	-	hypothetical protein lmo0792			0.565	0.07	0.99	0	0.5	0.09
IEJ01_09650	NP_465358.1	lmo1833	pyrD	dihydroorotate dehydrogenase	Yes		0.623	0.07	0.857	-0.03	0.245	-0.15
IEJ01_02310	NP_463978.1	lmo0449	-	hypothetical protein lmo0449			0.617	0.07	0.743	-0.05	0.133	-0.19
IEJ01_00145	NP_463562.1	lmo0029	-	hypothetical protein lmo0029			0.669	0.07	0.989	0	0.364	-0.13
IEJ01_08110	NP_465079.1	lmo1554	hemB	delta-aminolevulinic acid dehydratase			0.438	0.07	0.419	-0.09	0.005	-0.24
IEJ01_08000	NP_465057.1	lmo1532	ruvB	Holliday junction DNA helicase RuvB			0.378	0.07	0.196	-0.11	0.488	-0.06
IEJ01_04670	NP_464442.1	lmo0916	-	PTS sugar transporter subunit IIA			0.918	0.07		0		-0.02
IEJ01_06935	NP_464846.1	lmo1321	-	hypothetical protein lmo1321			0.643	0.07	0.993	0	0.396	0.11
IEJ01_10105	NP_465448.1	lmo1924	tyrA	prephenate dehydrogenase			0.644	0.06	0.287	-0.14	0.009	-0.31
IEJ01_03190	NP_464152.1	lmo0625	-	hypothetical protein lmo0625			0.656	0.06	0.657	0.07	0.625	0.07
IEJ01_11035	NP_465632.1	lmo2108	-	N-acetylglucosamine-6-phosphate deacetylase			0.704	0.06	0.765	-0.05	0.846	0.03
IEJ01_01050	NP_463743.1	lmo0212	-	hypothetical protein lmo0212			0.598	0.06	0.285	0.13	0.181	0.15
IEJ01_05020	NP_464510.1	lmo0985	-	hypothetical protein lmo0985			0.882	0.06	0.255	0.13	0.286	0.17
IEJ01_02045	NP_463926.1	lmo0396	proC	pyrroline-5-carboxylate reductase			0.513	0.06	0.274	0.11	0.402	0.09
IEJ01_00085	NP_463550.1	lmo0017	-	capsule biosynthesis protein CapA			0.776	0.06	0.373	-0.13	0.707	-0.06
IEJ01_10315	NP_465490.1	lmo1966	-	hypothetical protein lmo1966			0.557	0.06	0.36	-0.11	0.996	0
IEJ01_02270	NP_463971.1	lmo0442	-	hypothetical protein lmo0442			0.84	0.06	0.873	-0.03	0.44	0.13
IEJ01_02370	NP_463990.1	lmo0461	-	hypothetical protein lmo0461			0.905	0.06	0.653	-0.04	0.293	-0.13
IEJ01_06500	NP_465802.1	lmo2278	lysA	L-alanoyl-D-glutamate peptidase			0.72	0.06	0.933	0.02	0.054	0.28
IEJ01_13955	NP_466173.1	lmo2651	-	PTS mannitol transporter subunit IIA			0.848	0.06	0	3.58	0	2.16
IEJ01_00135	NP_463560.1	lmo0027	-	PTS beta-glucoside transporter subunit IIABC			0.728	0.06	0.718	0.06	0	-0.83
IEJ01_07025	NP_464864.1	lmo1339	-	glucose kinase			0.554	0.06	0.691	0.05	0.899	-0.02
IEJ01_07525	NP_464963.1	lmo1438	-	penicillin-binding protein			0.455	0.06	0.929	0.02	0.676	-0.04
IEJ01_10125	NP_465452.1	lmo1928	aroF	chorismate synthase			0.739	0.06	0.721	-0.06	0.127	-0.23
IEJ01_08560	NP_465168.1	lmo1643	-	hypothetical protein lmo1643			0.633	0.06	0.84	-0.03	0.99	0
IEJ01_06975	NP_464854.1	lmo1329	ribC	riboflavin kinase			0.675	0.06	0.634	-0.07	0.249	0.15
IEJ01_14330	NP_466234.1	lmo2712	-	gluconate kinase			0.744	0.06	0.017	-0.38	0.001	-0.5
IEJ01_02390	YP_008475629.1	lmo0464a	-	hypothetical protein lmo0464a			0.866	0.06	0.873	0.03	0.471	0.12
IEJ01_07900	NP_465038.1	lmo1513	-	iron-sulfur cofactor synthesis protein			0.644	0.06	0	-0.43	0.002	-0.33
IEJ01_07910	NP_465039.1	lmo1514	-	recombination factor protein RarA			0.558	0.06	0.96	-0.01	0.228	-0.12
IEJ01_04385	NP_464391.1	lmo0865	-	phosphomannomutase			0.771	0.06	0.454	-0.11	0.995	0
IEJ01_05050	NP_464516.1	lmo0991	-	hypothetical protein lmo0991			0.682	0.06	0.296	-0.14	0.455	-0.1
IEJ01_01930	NP_463904.1	lmo0374	-	PTS beta-glucoside transporter subunit IIB			0.89	0.06	0.976	0.01	0.802	-0.04
IEJ01_10365	NP_465500.1	lmo1976	-	oxidoreductase			0.646	0.06	0.996	0	0.591	0.07
IEJ01_11455	NP_465711.1	lmo2187	-	hypothetical protein lmo2187			0.818	0.06	0.611	0.08	0.811	0.04
IEJ01_00625	NP_463658.1	lmo0125	-	hypothetical protein lmo0125			0.879	0.06	0.667	0.06	0.369	0.15
IEJ01_08105	NP_465078.1	lmo1553	hemL	glutamate-1-semialdehyde aminotransferase			0.512	0.05	0.102	-0.14	0.025	-0.17
IEJ01_03960	NP_464306.1	lmo0779	-	hypothetical protein lmo0779			0.729	0.05	0.369	0.13	0.58	0.09
IEJ01_12815	NP_465956.1	lmo2433	-	acetylesterase			0.667	0.05	0.745	-0.05	0.772	0.04
IEJ01_05145	NP_464535.1	lmo1010	-	LysR family transcriptional regulator			0.489	0.05	0.667	0.05	0.689	0.04
IEJ01_06745	NP_464808.1	lmo1283	-	LacX protein			0.644	0.05	0.287	-0.13	0.029	-0.22
IEJ01_10460	NP_465519.1	lmo1995	dra	deoxyribose-phosphate aldolase			0.624	0.05	0.338	-0.11	0.054	-0.19
IEJ01_09255	NP_465282.1	lmo1757	-	hypothetical protein lmo1757			0.591	0.05	0.865	0.03	0.883	0.02
IEJ01_09585	NP_465345.1	lmo1820	-	serine/threonine protein kinase			0.587	0.05	0.601	-0.06	0.095	-0.15
IEJ01_05040	NP_464514.1	lmo0989	-	MarR family transcriptional regulator			0.73	0.05	0.617	0.07	0.189	0.17
IEJ01_07195	NP_464898.1	lmo1373	-	branched-chain alpha-keto acid dehydrogenase subunit E1			0.557	0.05	0.526	-0.07	0.795	-0.03
IEJ01_05630	NP_464651.1	lmo1126	-	hypothetical protein lmo1126			0.873	0.05	0.796	0.04	0.551	-0.1
IEJ01_09565	NP_465341.1	lmo1816	rpmB	50S ribosomal protein L28			0.655	0.05	0	0.49	0	0.66
IEJ01_01945	NP_463907.1	lmo0377	-	hypothetical protein lmo0377			0.75	0.05	0.996	0	0.602	0.08
IEJ01_14160	NP_466202.1	lmo2680	kdpC	potassium-transporting ATPase subunit C			0.819	0.05	0.242	0.18	0.776	-0.05
IEJ01_06860	NP_464831.1	lmo1306	-	hypothetical protein lmo1306			0.653	0.05	0.003	0.27	0	0.88
IEJ01_07355	NP_464929.1	lmo1404	mutL	DNA mismatch repair protein			0.654	0.05	0.886	0.02	0.052	0.18
IEJ01_10265	NP_465480.1	lmo1956	fur	Fur family transcriptional regulator			0.644	0.05	0	0.31	0	0.52
IEJ01_01995	NP_463916.1	lmo0386	-	IolD protein			0.869	0.05	0.721	-0.06	0.591	-0.09
IEJ01_02400	NP_463995.1	lmo0466	-	hypothetical protein lmo0466			0.678	0.04	0.636	-0.06	0.548	0.07
IEJ01_02355	NP_463987.1	lmo0458	-	hydantoinase			0.889	0.04	0.983	0.01	0.693	-0.07
IEJ01_02030	NP_463923.1	lmo0393	-	hypothetical protein lmo0393			0.763	0.04	0.442	0.11	0.061	-0.24
IEJ01_10840	NP_465595.1	lmo2071	-	hypothetical protein lmo2071			0.831	0.04	0.731	-0.06	0.99	0
IEJ01_00620	NP_463657.1	lmo0124	-	hypothetical protein lmo0124			0.93	0.04	0.811	-0.03	0.492	0.09
IEJ01_01640	NP_463845.1	lmo0315	-	thiamin biosynthesis protein			0.942	0.04	0.927	0.01	0.703	0.05
IEJ01_07185	NP_464896.1	lmo1371	-	dihydrolipoamide dehydrogenase			0.693	0.04	0.288	-0.12	0.426	-0.09
IEJ01_12740	NP_465941.1	lmo2418	-	ABC transporter permease			0.73	0.04	0.017	-0.26	0.098	-0.18
IEJ01_01880	NP_463894.1	lmo0364	-	transcriptional regulator			0.834	0.04	0.558	0.09	0.103	0.25
IEJ01_03430	NP_464199.1	lmo0672	-	hypothetical protein lmo0672			0.859	0.04	0.456	-0.11	0.098	-0.29
IEJ01_02630	NP_464041.1	lmo0513	-	hypothetical protein lmo0513			0.682	0.04	0.003	0.27	0.001	0.28
IEJ01_07880	NP_465034.1	lmo1509	-	exodeoxyribonuclease V			0.633	0.04	0.996	0	0.868	-0.02
IEJ01_08575	NP_465171.1	lmo1646	-	exonuclease SbcD			0.799	0.04	0.454	-0.11	0.365	-0.12
IEJ01_05800	NP_464685.1	lmo1160	-	PduL protein	Yes		0.938	0.04	0.519	-0.05	0.36	0.12
IEJ01_08890	NP_465210.1	lmo1685	gsaB	glutamate-1-semialdehyde aminotransferase			0.674	0.04	0.736	-0.04	0.07	-0.16
IEJ01_04555	NP_464424.1	lmo0898	-	hypothetical protein lmo0898			0.688	0.04	0.937	-0.02	0.023	-0.19
IEJ01_11555	NP_465731.1	lmo2207	-	hypothetical protein lmo2207			0.79	0.04	0.004	0.35	0.001	0.4
IEJ01_09345	NP_465300.1	lmo1775	purE	phosphoribosylaminoimidazole carboxylase catalytic subunit			0.94	0.04	0.567	0.05	0.589	0.07
IEJ01_09760	NP_465380.1	lmo1855	-	D-alanyl-D-alanine carboxypeptidase			0.69	0.04	0.7	0.05	0.772	-0.03
IEJ01_05795	NP_464684.1	lmo1159	-	carboxysome structural protein			0.956	0.04		-0.02		-0.01
IEJ01_08155	NP_465088.1	lmo1563	coaE	dephospho-CoA kinase			0.754	0.04	0.546	-0.08	0.057	-0.21
IEJ01_06730	NP_464805.1	lmo1280	codY	transcriptional repressor CodY			0.712	0.04	0.02	0.23	0.224	0.12
IEJ01_13330	NP_466058.1	lmo2535	atpB	ATP synthase F0F1 subunit A			0.725	0.04	0.007	-0.25	0.001	-0.31
IEJ01_09660	NP_465360.1	lmo1835	carB	carbamoyl-phosphate synthetase	Yes		0.719	0.04	0.983	-0.01	0.295	-0.11
IEJ01_09080	NP_465247.1	lmo1722	-	ATP-dependent RNA helicase			0.697	0.04	0.046	0.18	0.001	0.27
IEJ01_12155	WP_010990193.1			hypothetical protein			0.835	0.04	0.004	0.44	0.009	0.38
IEJ01_03135	NP_464141.1	lmo0614	-	hypothetical protein lmo0614			0.801	0.04	0.648	0.07	0.075	0.22
IEJ01_04820	NP_464471.1	lmo0946	-	hypothetical protein lmo0946			0.765	0.04	0.521	-0.09	0.705	0.05
IEJ01_07565	NP_464971.1	lmo1446	zurM	metal (zinc) transport protein (ABC transporter, permease)			0.73	0.04	0.933	-0.02	0.959	-0.01
IEJ01_05480	NP_464602.1	lmo1077	-	teichoic acid biosynthesis protein B			0.609	0.04	0.941	0.01	0.481	0.06
IEJ01_07405	NP_464939.1	lmo1414	-	acetyl-CoA:acetyltransferase			0.684	0.04	0.566	-0.06	0.166	0.12
IEJ01_15065	NP_466378.1	lmo2856	rpmH	50S ribosomal protein L34			0.815	0.04	0	0.51	0	0.62
IEJ01_07335	NP_464925.1	lmo1400	-	N-acetyltransferase			0.769	0.04	0.905	0.02	0.91	0.02
IEJ01_08130	NP_465083.1	lmo1558	engB	GTP-binding protein EngB			0.717	0.04	0.122	0.15	0.326	0.1
IEJ01_10670	NP_465561.1	lmo2037	mraY	phospho-N-acetylmuramoyl-pentapeptide-transferase			0.724	0.03	0.791	-0.04	0.977	0
IEJ01_08255	NP_465108.1	lmo1583	tpx	thiol peroxidase			0.83	0.03	0.745	0.05	0.413	0.11
IEJ01_04070	NP_464328.1	lmo0801	-	internalin			0.874	0.03	0.925	-0.02	0.272	0.17
IEJ01_09745	NP_465377.1	lmo1852	-	mercury-binding protein			0.793	0.03	0.915	0.02	0.333	-0.11
IEJ01_14735	NP_466313.1	lmo2791	parA	partition protein, ParA-like protein			0.788	0.03	0.339	0.12	0.329	0.11
IEJ01_03895	NP_464293.1	lmo0766	-	sugar ABC transporter permease			0.956	0.03	0.933	-0.01	0.98	0
IEJ01_00705	NP_463674.1	lmo0141	-	hypothetical protein lmo0141			0.945	0.03	0.743	0.04	0.895	0.02
IEJ01_00100	NP_463553.1	lmo0020	-	GntR family transcriptional regulator			0.869	0.03	0.501	0.1	0.745	-0.05
IEJ01_12995	NP_465991.1	lmo2468	clpP	ATP-dependent Clp protease proteolytic subunit	Yes		0.817	0.03	0.99	0	0.831	0.03
IEJ01_00340	NP_463601.1	lmo0068	-	hypothetical protein lmo0068			0.917	0.03	0.766	0.05	0.197	-0.23
IEJ01_11615	NP_465743.1	lmo2219	-	foldase			0.735	0.03	0.22	0.11	0.003	0.21
IEJ01_01440	NP_463806.1	lmo0275	-	hypothetical protein lmo0275			0.823	0.03	0	0.44	0	0.39
IEJ01_14680	NP_466302.1	lmo2780	-	PTS cellbiose transporter subunit IIA			0.967	0.03	0.818	-0.02		0.03
IEJ01_00350	NP_463603.1	lmo0070	-	hypothetical protein lmo0070			0.892	0.03	0.816	0.04	0.283	-0.16
IEJ01_01585	NP_463835.1	lmo0304	-	hypothetical protein lmo0304			0.889	0.03	0.886	0.03	0.457	-0.11
IEJ01_09795	NP_465387.1	lmo1862	-	hypothetical protein lmo1862			0.824	0.02	0.753	-0.04	0.879	0.02
IEJ01_11460	NP_465712.1	lmo2188	-	oligoendopeptidase			0.839	0.02	0.003	-0.3	0	-0.4
IEJ01_12625	NP_465918.1	lmo2395	-	hypothetical protein lmo2395			0.973	0.02		-0.01		0.02
IEJ01_00905	NP_463714.1	lmo0183	-	alpha-glucosidase			0.895	0.02	0.816	0.04	0.818	-0.04
IEJ01_05560	NP_464618.1	lmo1093	nadE	NAD synthetase			0.815	0.02	0	-0.34	0	-0.37
IEJ01_10110	NP_465449.1	lmo1925	hisC	histidinol-phosphate aminotransferase			0.871	0.02	0.407	-0.1	0.003	-0.31
IEJ01_01070	NP_463747.1	lmo0216	-	hypothetical protein lmo0216			0.831	0.02	0.791	0.03	0.993	0
IEJ01_04510	NP_464415.1	lmo0889	RsbR	positive regulator of sigma-B activity			0.847	0.02	0.836	0.03	0.904	-0.01
IEJ01_08565	NP_465169.1	lmo1644	-	helicase SNF2			0.832	0.02	0.596	-0.06	0.881	-0.02
IEJ01_10765	NP_465580.1	lmo2056	-	hypothetical protein lmo2056			0.874	0.02	0.886	0.03	0.052	0.21
IEJ01_14290	NP_466226.1	lmo2704	dnaX	DNA polymerase III subunit gamma/tau			0.874	0.02	0.73	0.05	0.731	0.04
IEJ01_14535	NP_466275.1	lmo2753	-	hypothetical protein lmo2753			0.931	0.02	0.358	0.14	0.879	0.03
IEJ01_12585	NP_465911.1	lmo2388	-	hypothetical protein lmo2388			0.89	0.02	0.651	-0.06	0.095	-0.19
IEJ01_06640	NP_464787.1	lmo1262	-	transcriptional regulator			0.881	0.02	0.204	0.14	0.256	0.12
IEJ01_01805	NP_463880.1	lmo0350	-	hypothetical protein lmo0350			0.973	0.02	0.919	-0.01	0.483	-0.09
IEJ01_04825	NP_464472.1	lmo0947	-	hypothetical protein lmo0947			0.888	0.02	0.733	0.05	0.025	0.24
IEJ01_10705	NP_465568.1	lmo2044	-	peptide ABC transporter substrate-binding protein			0.895	0.02	0.555	-0.08	0.697	0.05
IEJ01_08115	NP_465080.1	lmo1555	hemD	uroporphyrinogen-III synthase			0.901	0.02	0.056	-0.22	0.015	-0.27
IEJ01_13335	NP_466059.1	lmo2536	atpI	ATP synthase subunit I			0.847	0.02	0.003	-0.22	0.002	-0.23
IEJ01_05550	NP_464616.1	lmo1091	-	glysosyltransferase			0.869	0.02	0.996	0	0.087	-0.15
IEJ01_05515	NP_464609.1	lmo1084	-	DTDP-L-rhamnose synthetase			0.855	0.01	0.974	0.01	0.944	0.01
IEJ01_14765	NP_466319.1	lmo2797	-	PTS mannitol transporter subunit IIA			0.978	0.01	0.816	0.03	0.121	-0.27
IEJ01_00040	NP_463541.1	lmo0008	-	cardiolipin synthase			0.901	0.01	0.736	0.05	0.453	0.09
IEJ01_12895	NP_465971.1	lmo2448	smpB	SsrA-binding protein			0.929	0.01	0.935	-0.02	0.069	-0.21
IEJ01_10050	NP_465437.1	lmo1913	-	hypothetical protein lmo1913			0.947	0.01	0.634	-0.08	0.113	0.23
IEJ01_01475	NP_463813.1	lmo0282	-	hypothetical protein lmo0282			0.929	0.01	0.176	0.17	0.116	0.19
IEJ01_01555	NP_463829.1	lmo0298	-	PTS beta-glucoside transporter subunit IIC			0.978	0.01	0.887	0.02	0.91	-0.02
IEJ01_07890	NP_465036.1	lmo1511	-	hypothetical protein lmo1511			0.91	0.01	0.99	0	0.225	-0.12
IEJ01_09655	NP_465359.1	lmo1834	pyrDII	dihydroorotate dehydrogenase electron transfer subunit	Yes		0.934	0.01	0.96	-0.01	0.215	-0.16
IEJ01_02920	NP_464099.1	lmo0571	-	methyltransferase			0.953	0.01	0.73	0.06	0.804	0.04
IEJ01_05815	NP_464688.1	lmo1163	-	carbon dioxide concentrating mechanism protein	Yes		0.989	0.01		-0.01		-0.01
IEJ01_10760	NP_465579.1	lmo2055	-	hypothetical protein lmo2055			0.957	0.01	0.566	0.08	0.489	-0.09
IEJ01_10775	NP_465582.1	lmo2058	ctaA	heme O oxygenase			0.921	0.01	0.608	0.05	0	0.24
IEJ01_08275	NP_465112.1	lmo1587	argF	ornithine carbamoyltransferase			0.992	0.01	0.584	0.04	0.914	-0.01
IEJ01_01885	NP_463895.1	lmo0365	-	hypothetical protein lmo0365			0.98	0.01	0.955	0.01	0.895	-0.02
IEJ01_06965	NP_464852.1	lmo1327	rbfA	ribosome-binding factor A			0.961	0.01	0.215	0.14	0.333	0.11
IEJ01_00055	NP_463544.1	lmo0011	-	mevalonate diphosphate decarboxylase			0.977	0	0.446	0.1	0.18	0.15
IEJ01_04995	NP_464505.1	lmo0980	-	ABC transporter permease			0.981	0	0.998	0	0	-1.09
IEJ01_01115	NP_463756.1	lmo0225	folA	dihydroneopterin aldolase			0.98	0	0.786	-0.05	0.689	-0.06
IEJ01_12220	YP_008475641.1	lmo02333	-	hypothetical protein lmo02333			0.995	0	0.996	0	0.995	0
IEJ01_10180	NP_465463.1	lmo1939	cmk	cytidylate kinase			0.973	0	0.316	0.12	0.008	0.26
IEJ01_06025	NP_464730.1	lmo1205	-	cobalamin biosynthesis protein CbiN			0.998	0		0.01		-0.03
IEJ01_06820	NP_464823.1	lmo1298	glnR	glutamine synthetase repressor			0.996	0	0.846	0.04	0.004	0.55
IEJ01_07045	NP_464868.1	lmo1343	-	competence protein ComGE			1	0		-0.01		0.02
IEJ01_02140	NP_463945.1	lmo0416	-	transcriptional regulator			0.996	0	0.811	0.04	0.193	0.21
IEJ01_11840	NP_465788.1	lmo2264	-	hypothetical protein lmo2264			0.997	0	0.648	-0.07	0.616	0.07
IEJ01_10675	NP_465562.1	lmo2038	murE	UDP-N-acetylmuramoylalanyl-D-glutamate--2,6-diaminopimelate ligase			0.991	0	0.7	0.04	0.051	0.15
IEJ01_07000	NP_464859.1	lmo1334	-	hypothetical protein lmo1334			0.996	0	0.049	0.23	0	0.73
IEJ01_10225	NP_465472.1	lmo1948	resD	two-component response regulator ResD			0.983	0	0.631	0.05	0.282	0.09
IEJ01_08730	NP_465202.1	lmo1677	-	1,4-dihydroxy-2-naphthoate octaprenyltransferase			0.981	0	0.988	0	0.097	0.13
IEJ01_01505	NP_463819.1	lmo0288	-	two-component sensor histidine kinase			0.98	0	0.996	0	0.736	-0.03
IEJ01_05280	NP_464562.1	lmo1037	-	hypothetical protein lmo1037			0.983	0	0.996	0	0.122	0.21
IEJ01_10930	NP_465612.1	lmo2088	-	transcriptional regulator			0.991	0	0.996	0	0.503	0.11
IEJ01_07060	NP_464871.1	lmo1346	comGB	competence protein ComGB			0.986	0	0.939	-0.01	0.895	0.02
IEJ01_02290	NP_463975.1	lmo0446	-	penicillin acylase			0.991	0	0.952	-0.01	0.582	-0.08
IEJ01_06875	NP_464834.1	lmo1309	-	hypothetical protein lmo1309			0.983	0	0.271	0.15	0.101	0.22
IEJ01_07350	NP_464928.1	lmo1403	mutS	DNA mismatch repair protein MutS			0.97	0	0.841	0.03	0.019	0.22
IEJ01_14260	NP_466220.1	lmo2698	-	RpiR family transcriptional regulator			0.981	0	0.967	0.01	0.308	0.14
IEJ01_09850	NP_465398.1	lmo1873	-	dihydrofolate reductase			0.967	0	0.22	-0.12	0.028	-0.19
IEJ01_09545	NP_465337.1	lmo1812	-	L-serine dehydratase			0.96	-0.01	0.506	-0.09	0.94	-0.01
IEJ01_09215	NP_465274.1	lmo1749	-	shikimate kinase			0.97	-0.01	0.027	-0.26	0.026	-0.25
IEJ01_07640	NP_464986.1	lmo1461	-	hypothetical protein lmo1461			0.956	-0.01	0.395	0.11	0.967	-0.01
IEJ01_06080	NP_464741.1	lmo1216	-	N-acetylmuramoyl-L-alanine amidase			0.959	-0.01	0.745	-0.06	0.274	0.15
IEJ01_13045	NP_466001.1	lmo2478	trxB	thioredoxin reductase			0.991	-0.01	0.57	-0.08	0.527	-0.08
IEJ01_03695	NP_464252.1	lmo0725	-	peptidoglycan-binding protein			0.941	-0.01	0	0.62	0	0.8
IEJ01_07885	NP_465035.1	lmo1510	-	hypothetical protein lmo1510			0.919	-0.01	0.901	-0.02	0.172	-0.12
IEJ01_01715	NP_463862.1	lmo0332	-	hypothetical protein lmo0332			0.956	-0.01	0.435	0.12	0.029	0.32
IEJ01_03425	NP_464198.1	lmo0671	-	hypothetical protein lmo0671	Yes		0.956	-0.01	0.595	0.08	0.966	0.01
IEJ01_09975	NP_465422.1	lmo1898	-	hypothetical protein lmo1898			0.904	-0.01	0.863	0.03	0.596	0.05
IEJ01_00735	NP_463680.1	lmo0147	-	hypothetical protein lmo0147			0.98	-0.01	0.857	-0.02	0.689	0.05
IEJ01_05555	NP_464617.1	lmo1092	-	nicotinate phosphoribosyltransferase			0.896	-0.01	0.017	-0.21	0.01	-0.23
IEJ01_01735	NP_463866.1	lmo0336	-	hypothetical protein lmo0336			0.98	-0.01	0.654	-0.04	0.109	-0.27
IEJ01_05985	NP_464722.1	lmo1197	cbiF	precorrin-3 methylase			0.982	-0.01	0.79	-0.02		-0.08
IEJ01_09540	NP_465336.1	lmo1811	-	ATP-dependent DNA helicase RecG			0.918	-0.01	0.721	-0.05	0.943	0.01
IEJ01_01535	NP_463825.1	lmo0294	-	LysR family transcriptional regulator			0.931	-0.01	0.496	0.09	0.154	0.17
IEJ01_08630	NP_465182.1	lmo1657	tsf	elongation factor Ts			0.916	-0.01	0	0.41	0	0.45
IEJ01_12620	NP_465918.1	lmo2395	-	hypothetical protein lmo2395			0.96	-0.01		0		0.01
IEJ01_07065	NP_464872.1	lmo1347	comGA	competence protein ComGA			0.97	-0.01	0.57	-0.07	0.779	-0.05
IEJ01_10530	NP_465533.1	lmo2009	-	sugar ABC transporter permease			0.97	-0.01	0.653	0.06	0.697	-0.06
IEJ01_13655	NP_466114.1	lmo2591	-	N-acetylmuramoyl-L-alanine amidase			0.906	-0.01	0.009	0.28	0	0.41
IEJ01_10115	NP_465450.1	lmo1926	-	chorismate mutase			0.93	-0.01	0.312	-0.14	0.002	-0.43
IEJ01_04690	NP_464446.1	lmo0920	-	hypothetical protein lmo0920			0.925	-0.01	0.021	-0.31	0.499	-0.09
IEJ01_08880	NP_465208.1	lmo1683	-	Fur family transcriptional regulator			0.931	-0.01	0.157	0.2	0.015	0.33
IEJ01_13020	NP_465996.1	lmo2473	-	hypothetical protein lmo2473			0.887	-0.01	0.757	-0.04	0.303	-0.1
IEJ01_09960	NP_465419.1	lmo1895	dnaD	chromosome replication initiation protein			0.881	-0.02	0.297	0.11	0.681	0.05
IEJ01_08720	NP_465200.1	lmo1675	menD	2-succinyl-5-enolpyruvyl-6-hydroxy-3-cyclohexene-1-carboxylate synthase			0.858	-0.02	0.089	-0.15	0.057	-0.15
IEJ01_08120	NP_465081.1	lmo1556	hemC	porphobilinogen deaminase			0.856	-0.02	0.044	-0.19	0.001	-0.28
IEJ01_13595	NP_466109.1	lmo2586	-	formate dehydrogenase subunit alpha			0.958	-0.02	0.857	0.03	0.018	-0.66
IEJ01_09170	NP_465265.1	lmo1740	-	amino acid ABC transporter permease			0.949	-0.02	0.718	-0.05	0.385	-0.15
IEJ01_02575	NP_464030.1	lmo0502	-	sugar-phosphate isomerase			0.971	-0.02	0.926	-0.01	0.959	-0.01
IEJ01_10320	NP_465491.1	lmo1967	-	toxic ion resistance protein			0.875	-0.02	0.948	0.01	0.702	0.05
IEJ01_00050	NP_463543.1	lmo0010	-	mevalonate kinase			0.884	-0.02	0.952	-0.01	0.697	0.06
IEJ01_07340	NP_464926.1	lmo1401	-	hypothetical protein lmo1401			0.825	-0.02	0.899	0.02	0.879	0.02
IEJ01_02945	NP_464104.1	lmo0576	-	hypothetical protein lmo0576			0.887	-0.02	0.477	-0.1	0.177	0.18
IEJ01_08165	NP_465090.1	lmo1565	polA	DNA polymerase I			0.843	-0.02	0.252	-0.1	0.093	-0.14
IEJ01_07595	NP_464977.1	lmo1452	-	hypothetical protein lmo1452			0.848	-0.02	0.382	-0.1	0.765	-0.04
IEJ01_00550	NP_463643.1	lmo0110	-	lipase			0.92	-0.02	0.955	0.01	0.036	-0.37
IEJ01_07515	NP_464961.1	lmo1436	-	aspartate kinase			0.819	-0.02	0.526	0.07	0.503	-0.06
IEJ01_03170	NP_464148.1	lmo0621	-	hypothetical protein lmo0621			0.914	-0.02	0.967	-0.01	0.567	0.09
IEJ01_05520	NP_464610.1	lmo1085	-	teichoic acid biosynthesis protein B			0.756	-0.02	0.766	0.04	0.449	0.07
IEJ01_10890	NP_465605.1	lmo2081	-	camphor resistance protein CrcB			0.879	-0.03	0.983	-0.01	0.328	-0.14
IEJ01_11200	NP_465660.1	lmo2136	-	PTS fructose transporter subunit IIB			0.962	-0.03		0		-0.02
IEJ01_13540	NP_466099.1	lmo2576	-	colossin A			0.886	-0.03	0.983	-0.01	0.515	0.1
IEJ01_11250	NP_465670.1	lmo2146	-	LysR family transcriptional regulator			0.911	-0.03	0.55	0.09	0.625	0.08
IEJ01_01125	NP_463758.1	lmo0227	-	hypothetical protein lmo0227			0.776	-0.03	0.78	0.04	0.263	-0.1
IEJ01_02430	NP_464001.1	lmo0472	-	hypothetical protein lmo0472			0.866	-0.03	0.904	0.02	0.328	0.14
IEJ01_05730	NP_464671.1	lmo1146	-	hypothetical protein lmo1146			0.953	-0.03	0.506	-0.07	0.725	-0.05
IEJ01_12245	NP_465861.1	lmo2338	pepC	aminopeptidase			0.823	-0.03	0.61	-0.07	0.196	-0.15
IEJ01_00890	NP_463711.1	lmo0180	-	sugar ABC transporter permease			0.928	-0.03	0.254	0.18	0.718	0.06
IEJ01_07170	NP_464893.1	lmo1368	recN	DNA repair protein			0.77	-0.03	0.98	0.01	0.581	0.06
IEJ01_06910	NP_464841.1	lmo1316	cdsA	phosphatidate cytidylyltransferase			0.857	-0.03	0.049	-0.28	0.001	-0.44
IEJ01_08990	NP_465230.1	lmo1705	-	deoxyguanosine kinase/deoxyadenosine kinase			0.793	-0.03	0.628	0.06	0.168	0.15
IEJ01_11255	NP_465671.1	lmo2147	-	hypothetical protein lmo2147			0.86	-0.03	0.171	0.19	0.011	0.35
IEJ01_02625	NP_464040.1	lmo0512	-	hypothetical protein lmo0512			0.814	-0.03	0.043	0.21	0.028	0.23
IEJ01_02800	NP_464075.1	lmo0547	-	DeoR family transcriptional regulator			0.735	-0.03	0.774	0.04	0	0.62
IEJ01_10810	NP_465589.1	lmo2065	-	hypothetical protein lmo2065			0.861	-0.03	0.174	0.2	0.009	0.38
IEJ01_10975	NP_465621.1	lmo2097	-	PTS galacticol transporter subunit IIB			0.953	-0.03	0.824	-0.02	0.936	0.01
IEJ01_14725	NP_466311.1	lmo2789	-	hypothetical protein lmo2789			0.769	-0.03	0.262	0.12	0.904	-0.01
IEJ01_09050	NP_465241.1	lmo1716	-	transcriptional regulator			0.887	-0.03	0.684	0.07	0.955	-0.01
IEJ01_08570	NP_465170.1	lmo1645	-	ATP-dependent dsDNA exonuclease SbcC			0.784	-0.03	0.502	-0.09	0.029	-0.23
IEJ01_07715	NP_465001.1	lmo1476	hemN	coproporphyrinogen III oxidase			0.727	-0.03	0.113	-0.16	0.233	-0.12
IEJ01_05775	NP_464680.1	lmo1155	-	diol dehydratase subunit gamma	Yes		0.958	-0.03		0.01		-0.03
IEJ01_10340	NP_465495.1	lmo1971	ulaA	PTS ascorbate transporter subunit IIC			0.928	-0.03	0.58	-0.07	0.445	-0.12
IEJ01_14150	NP_466200.1	lmo2678	-	XRE family transcriptional regulator			0.875	-0.03	0.615	-0.08	0.689	0.06
IEJ01_05530	NP_464612.1	lmo1087	-	glucitol dehydrogenase			0.722	-0.03	0.658	0.06	0.426	-0.08
IEJ01_06180	NP_464761.1	lmo1236	-	hypothetical protein lmo1236			0.847	-0.03	0.298	0.15	0.35	-0.14
IEJ01_04735	NP_464455.1	lmo0930	-	hypothetical protein lmo0930			0.758	-0.03	0.811	0.04	0.213	-0.13
IEJ01_09490	NP_465326.1	lmo1801	ffh	signal recognition particle protein Ffh			0.705	-0.04	0.568	0.07	0.263	0.11
IEJ01_05200	NP_464546.1	lmo1021	-	two-component sensor histidine kinase			0.664	-0.04	0.866	-0.02	0.812	0.02
IEJ01_07585	NP_464975.1	lmo1450	-	DEAD/DEAH box helicase			0.669	-0.04	0.651	0.05	0.767	0.03
IEJ01_04345	NP_464383.1	lmo0857	-	carboxylesterase			0.641	-0.04	0.228	0.1	0.46	0.06
IEJ01_12865	NP_465966.1	lmo2443	-	hypothetical protein lmo2443			0.847	-0.04	0.89	0.03	0.171	0.21
IEJ01_00205	NP_463574.1	lmo0041	-	hypothetical protein lmo0041			0.841	-0.04	0.768	0.05	0.603	-0.08
IEJ01_07555	NP_464969.1	lmo1444	-	foldase			0.874	-0.04	0.884	-0.03	0.244	0.2
IEJ01_10375	NP_465502.1	lmo1978	-	glucose-6-phosphate 1-dehydrogenase			0.783	-0.04	0.753	-0.05	0.595	-0.08
IEJ01_01265	NP_463771.1	lmo0240	-	hypothetical protein lmo0240	Yes		0.849	-0.04	0.983	-0.01	0.344	-0.15
IEJ01_09790	NP_465386.1	lmo1861	-	hypothetical protein lmo1861			0.689	-0.04	0.598	-0.06	0.734	-0.04
IEJ01_01705	NP_463858.1	lmo0328	-	hypothetical protein lmo0328			0.931	-0.04	0.931	0.01	0.642	0.07
IEJ01_01510	NP_463820.1	lmo0289	-	hypothetical protein lmo0289			0.703	-0.04	0.321	-0.11	0.2	-0.13
IEJ01_15010	NP_466367.1	lmo2845	-	MFS transporter			0.677	-0.04	0.83	-0.03	0.878	0.02
IEJ01_10990	NP_465624.1	lmo2100	-	GntR family transcriptional regulator			0.876	-0.04	0.529	-0.1	0.655	-0.08
IEJ01_07275	NP_464913.1	lmo1388	tcsA	CD4+ T cell-stimulating antigen, lipoprotein			0.724	-0.04	0.272	0.13	0.685	-0.05
IEJ01_12860	NP_465965.1	lmo2442	-	hypothetical protein lmo2442			0.919	-0.04	0.411	0.1	0.098	0.36
IEJ01_01025	NP_463738.1	lmo0207	-	hypothetical protein lmo0207			0.888	-0.04	0.96	-0.01	0.621	0.09
IEJ01_05205	NP_464547.1	lmo1022	-	two-component response regulator			0.72	-0.04	0.873	-0.03	0.928	0.01
IEJ01_00995	NP_463732.1	lmo0201	plcA	phosphatidylinositol-specific phospholipase c			0.88	-0.04	0.841	-0.03	0.995	0
IEJ01_14970	NP_466359.1	lmo2837	-	sugar ABC transporter permease	Yes		0.943	-0.04	0.927	-0.01		-0.05
IEJ01_05845	NP_464694.1	lmo1169	cobD	threonine-phosphate decarboxylase			0.783	-0.04	0.571	0.08	0.115	0.21
IEJ01_04740	NP_464456.1	lmo0931	-	lipoate protein ligase A			0.691	-0.04	0.744	-0.05	0.045	-0.19
IEJ01_09945	NP_465416.1	lmo1892	pbpA	penicillin-binding protein 2A			0.657	-0.04	0.642	-0.06	0.032	0.19
IEJ01_13405	NP_466072.1	lmo2549	gtcA	wall teichoic acid glycosylation protein GtcA			0.727	-0.04	0.979	0.01	0.411	0.1
IEJ01_06920	NP_464843.1	lmo1318	-	hypothetical protein lmo1318			0.667	-0.04	0.359	-0.1	0.037	-0.19
IEJ01_09045	NP_465240.1	lmo1715	-	hypothetical protein lmo1715			0.904	-0.04	0.255	0.16	0.737	0.05
IEJ01_07945	NP_465046.1	lmo1521	-	N-acetylmuramoyl-L-alanine amidase			0.689	-0.04	0.745	-0.05	0.745	-0.04
IEJ01_01560	NP_463830.1	lmo0299	-	PTS beta-glucoside transporter subunit IIB			0.937	-0.04	0.98	0		-0.08
IEJ01_08215	NP_465100.1	lmo1575	-	hypothetical protein lmo1575			0.64	-0.04	0.272	-0.11	0.179	-0.13
IEJ01_08195	NP_465096.1	lmo1571	pfkA	6-phosphofructokinase	Yes		0.596	-0.05	0.982	0	0.121	-0.13
IEJ01_04750	NP_464458.1	lmo0933	-	sugar transferase			0.685	-0.05	0.49	-0.09	0.457	-0.09
IEJ01_08715	NP_465199.1	lmo1674	-	prolyl aminopetidase			0.596	-0.05	0.012	-0.21	0	-0.28
IEJ01_02565	NP_464028.1	lmo0500	-	transaldolase			0.921	-0.05	0.658	0.05	0.863	0.03
IEJ01_14320	NP_466232.1	lmo2710	-	hypothetical protein lmo2710			0.717	-0.05	0	0.55	0	0.5
IEJ01_07740	NP_465006.1	lmo1481	holA	DNA polymerase III subunit delta			0.69	-0.05	0.647	0.06	0.008	0.28
IEJ01_05770	NP_464679.1	lmo1154	-	diol dehydratase subunit gamma	Yes		0.938	-0.05	0.579	-0.03		-0.02
IEJ01_06115	NP_464748.1	lmo1223	-	ABC transporter ATP-binding proteins			0.73	-0.05	0.884	0.03	0.435	-0.1
IEJ01_06720	NP_464803.1	lmo1278	clpQ	ATP-dependent protease peptidase subunit			0.64	-0.05	0.378	-0.1	0.049	-0.19
IEJ01_04695	NP_464447.1	lmo0921	-	hypothetical protein lmo0921			0.78	-0.05	0.114	-0.24	0.664	-0.07
IEJ01_02425	NP_464000.1	lmo0471	-	hypothetical protein lmo0471			0.813	-0.05	0.773	0.05	0.353	-0.15
IEJ01_13665	NP_466116.1	lmo2593	-	MerR family transcriptional regulator			0.831	-0.05	0.988	0	0.769	-0.05
IEJ01_08205	NP_465098.1	lmo1573	accD	acetyl-CoA carboxylase subunit beta			0.547	-0.05	0.877	-0.02	0.392	0.08
IEJ01_08160	NP_465089.1	lmo1564	mutM	formamidopyrimidine-DNA glycosylase			0.633	-0.05	0.193	-0.14	0.041	-0.2
IEJ01_12785	NP_465950.1	lmo2427	-	cell division protein FtsW			0.715	-0.05	0.791	-0.04	0.669	0.06
IEJ01_09930	NP_465413.1	lmo1889	-	hypothetical protein lmo1889			0.753	-0.05	0.011	-0.39	0.43	-0.12
IEJ01_00115	NP_463556.1	lmo0023	-	PTS fructose transporter subunit IIC			0.933	-0.05		0		-0.02
IEJ01_04285	NP_464371.1	lmo0845	-	hypothetical protein lmo0845			0.702	-0.05	0.179	-0.17	0.027	-0.27
IEJ01_09220	NP_465275.1	lmo1750	-	hypothetical protein lmo1750			0.747	-0.05	0.019	0.34	0.069	0.25
IEJ01_06285	WP_157824771.1			pentapeptide repeat-containing protein			0.931	-0.05	0.901	0.01		0.03
IEJ01_14835	NP_466332.1	lmo2810	gidA	tRNA uridine 5-carboxymethylaminomethyl modification enzyme GidA			0.666	-0.05	0.842	0.03	0.417	0.1
IEJ01_07135	NP_464886.1	lmo1361	xseA	exodeoxyribonuclease VII large subunit			0.406	-0.05	0.087	-0.12	0.295	-0.08
IEJ01_00370	NP_463608.1	lmo0075	-	carboxyphosphonoenolpyruvate phosphonomutase	Yes		0.8	-0.05	0.113	-0.27	0.324	-0.16
IEJ01_14275	NP_466223.1	lmo2701	-	hypothetical protein lmo2701			0.594	-0.05	0.782	0.04	0.871	0.02
IEJ01_06170	NP_464759.1	lmo1234	uvrC	excinuclease ABC subunit C			0.565	-0.05	0.368	-0.1	0.566	0.06
IEJ01_04575	YP_008475634.1	lmo13a	-	hypothetical protein lmo13a			0.872	-0.06	0.866	0.03	0.26	0.2
IEJ01_09750	NP_465378.1	lmo1853	-	heavy metal-transporting ATPase			0.516	-0.06	0.832	-0.03	0.153	-0.12
IEJ01_02620	NP_464039.1	lmo0511	-	hypothetical protein lmo0511			0.719	-0.06	0.301	0.14	0.066	0.25
IEJ01_02025	NP_463922.1	lmo0392	-	hypothetical protein lmo0392			0.705	-0.06	0.857	0.03	0.01	-0.33
IEJ01_13425	NP_466076.1	lmo2553	-	hypothetical protein lmo2553			0.58	-0.06	0.549	-0.08	0.762	0.04
IEJ01_06035	NP_464732.1	lmo1207	-	cobalt transporter ATP-binding protein CbiO			0.828	-0.06	0.257	-0.17	0.465	-0.12
IEJ01_11530	NP_465726.1	lmo2202	-	3-oxoacyl-ACP synthase			0.644	-0.06	0.886	-0.03	0.871	-0.02
IEJ01_03380	NP_464189.1	lmo0662	thiD	phosphomethylpyrimidine kinase			0.533	-0.06	0.82	-0.03	0.372	-0.09
IEJ01_12955	NP_465984.1	lmo2461	sigL	RNA polymerase factor sigma-54			0.426	-0.06	0.35	0.08	0.191	0.1
IEJ01_02550	NP_464025.1	lmo0497	-	sugar transferase			0.52	-0.06	0.05	0.18	0.027	0.19
IEJ01_06090	NP_464743.1	lmo1218	-	rRNA methylase			0.551	-0.06	0.428	0.09	0.298	0.11
IEJ01_09095	NP_465250.1	lmo1725	-	GntR family tramscriptional regulator			0.866	-0.06	0.581	-0.07	0.52	0.11
IEJ01_09685	NP_465365.1	lmo1840	pyrR	bifunctional pyrimidine regulatory protein PyrR uracil phosphoribosyltransferase			0.686	-0.06	0.989	0	0.212	0.17
IEJ01_07125	NP_464884.1	lmo1359	nusB	transcription antitermination protein NusB			0.425	-0.06	0.808	-0.03	0.25	-0.09
IEJ01_07865	NP_465031.1	lmo1506	-	transporter			0.835	-0.06	0.653	-0.07	0.67	-0.07
IEJ01_03700	NP_464254.1	lmo0727	-	glucosamine--fructose-6-phosphate aminotransferase			0.496	-0.06	0	0.41	0	0.36
IEJ01_01370	NP_463792.1	lmo0261	-	phospho-beta-glucosidase			0.668	-0.06	0.531	-0.09	0	-0.45
IEJ01_04090	NP_464332.1	lmo0805	-	hypothetical protein lmo0805			0.75	-0.06	0.996	0	0.76	0.05
IEJ01_05690	NP_464663.1	lmo1138	-	ATP-dependent Clp protease proteolytic subunit	Yes		0.692	-0.06	0.431	-0.11	0.338	-0.13
IEJ01_05540	NP_464614.1	lmo1089	tagD	glycerol-3-phosphate cytidylyltransferase			0.689	-0.06	0.996	0	0.703	-0.06
IEJ01_14480	NP_466264.1	lmo2742	-	hypothetical protein lmo2742			0.746	-0.06	0.087	-0.28	0	-0.75
IEJ01_08340	NP_465124.1	lmo1599	ccpA	catabolite control protein A			0.357	-0.06	0.688	0.05	0.984	0
IEJ01_07330	NP_464924.1	lmo1399	-	phosphodiesterase			0.4	-0.06	0.565	-0.06	0.035	-0.16
IEJ01_09450	NP_465318.1	lmo1793	rimM	16S rRNA-processing protein RimM			0.519	-0.06	0.841	-0.03	0.322	-0.1
IEJ01_06870	NP_464833.1	lmo1308	-	hypothetical protein lmo1308			0.608	-0.06	0.263	0.14	0.179	0.16
IEJ01_06275	WP_014930120.1			hypothetical protein			0.918	-0.07		0.04		0.04
IEJ01_08200	NP_465097.1	lmo1572	accA	acetyl-CoA carboxylase carboxyltransferase subunit alpha			0.414	-0.07	0.371	-0.09	0.295	-0.09
IEJ01_07130	NP_464885.1	lmo1360	folD	bifunctional 5,10-methylene-tetrahydrofolate dehydrogenase/ 5,10-methylene-tetrahydrofolate cyclohydrolase			0.442	-0.07	0.188	-0.13	0.233	-0.1
IEJ01_13360	NP_466063.1	lmo2540	-	phosphatase			0.658	-0.07	0.627	0.07	0.067	0.24
IEJ01_09075	NP_465246.1	lmo1721	-	transcriptional regulator			0.467	-0.07	0.603	0.06	0.295	0.1
IEJ01_01975	NP_463912.1	lmo0382	-	transcriptional regulator			0.868	-0.07	0.655	0.05	0.804	-0.04
IEJ01_06780	NP_464815.1	lmo1290	-	internalin			0.776	-0.07	0.213	-0.2	0.655	0.08
IEJ01_09610	NP_465350.1	lmo1825	-	pantothenate metabolism flavoprotein			0.474	-0.07	0.941	0.01	0.453	-0.08
IEJ01_06770	NP_464813.1	lmo1288	-	S-ribosylhomocysteinase			0.617	-0.07	0.892	-0.03	0.033	-0.26
IEJ01_06955	NP_464850.1	lmo1325	infB	translation initiation factor IF-2			0.526	-0.07	0.992	0	0.959	0
IEJ01_00750	NP_463683.1	lmo0150	-	hypothetical protein lmo0150			0.751	-0.07	0.676	-0.07	0.317	-0.17
IEJ01_00895	NP_463712.1	lmo0181	-	sugar ABC transporter substrate-binding protein			0.644	-0.07	0.615	0.08	0.912	0.02
IEJ01_09855	NP_465399.1	lmo1874	thyA	thymidylate synthase			0.466	-0.07	0.038	-0.2	0.002	-0.28
IEJ01_07755	NP_465009.1	lmo1484	comEA	competence protein ComEA			0.869	-0.07	0.799	-0.03	0.772	0.04
IEJ01_08970	NP_465226.1	lmo1701	-	hypothetical protein lmo1701	Yes		0.557	-0.07	0.82	0.04	0.354	0.11
IEJ01_07120	NP_464883.1	lmo1358	-	hypothetical protein lmo1358			0.358	-0.07	0.334	-0.09	0.064	-0.15
IEJ01_07420	NP_464942.1	lmo1417	-	hypothetical protein lmo1417			0.545	-0.07	0.089	-0.2	0.152	-0.16
IEJ01_10095	NP_465446.1	lmo1922	-	hypothetical protein lmo1922			0.535	-0.07	0.199	-0.15	0.179	-0.15
IEJ01_01080	NP_463749.1	lmo0218	-	hypothetical protein lmo0218			0.586	-0.08	0.378	0.12	0.017	0.29
IEJ01_05780	NP_464681.1	lmo1156	-	diol dehydratase-reactivating factor large subunit	Yes		0.848	-0.08	0.791	-0.03	0.788	-0.04
IEJ01_08315	NP_465120.1	lmo1595	-	hypothetical protein lmo1595			0.603	-0.08	0.095	-0.22	0.026	-0.28
IEJ01_07410	NP_464940.1	lmo1415	-	hydroxy-3-methylglutaryl-CoA synthase			0.467	-0.08	0.905	-0.02	0.401	0.1
IEJ01_01630	NP_463843.1	lmo0313	-	hypothetical protein lmo0313			0.758	-0.08	0.936	0.02	0.914	-0.02
IEJ01_03950	NP_464304.1	lmo0777	-	hypothetical protein lmo0777			0.718	-0.08	0.087	0.29	0.023	0.4
IEJ01_09860	NP_465400.1	lmo1875	-	ABC transporter ATP-binding protein			0.301	-0.08	0.303	-0.09	0.085	-0.13
IEJ01_14700	NP_466306.1	lmo2784	-	transcriptional antiterminator	Yes		0.54	-0.08	0.866	0.03	0.478	-0.09
IEJ01_08140	NP_465085.1	lmo1560	dnaI	primosomal protein DnaI			0.395	-0.08	0.796	0.04	0.768	0.03
IEJ01_09950	NP_465417.1	lmo1893	-	hypothetical protein lmo1893			0.513	-0.08	0.84	0.03	0.832	-0.03
IEJ01_08670	NP_465190.1	lmo1665	-	hypothetical protein lmo1665			0.528	-0.08	0.446	0.11	0	0.42
IEJ01_14730	NP_466312.1	lmo2790	parB	partition protein ParB homolg			0.369	-0.08	0.316	0.11	0.748	-0.04
IEJ01_01835	NP_463886.1	lmo0356	-	oxidoreductase			0.477	-0.08	0.163	-0.16	0.153	-0.16
IEJ01_06725	NP_464804.1	lmo1279	hslU	ATP-dependent protease ATP-binding subunit HslU			0.276	-0.08	0.537	-0.06	0.155	-0.11
IEJ01_00060	NP_463545.1	lmo0012	-	mevalonate kinase			0.458	-0.08	0.771	-0.04	0.845	0.03
IEJ01_09730	NP_465374.1	lmo1849	-	metal ABC transporter ATP-binding protein			0.586	-0.08	0.748	-0.05	0.832	-0.03
IEJ01_04940	NP_464495.1	lmo0970	-	enoyl-ACP reductase			0.444	-0.08	0.996	0	0.649	-0.05
IEJ01_05965	NP_464718.1	lmo1193	cbiC	cobalt-precorrin-8X methylmutase			0.897	-0.08		-0.02		-0.04
IEJ01_09955	NP_465418.1	lmo1894	nth	endonuclease III (DNA repair)			0.459	-0.08	0.98	0.01	0.682	0.05
IEJ01_01275	NP_463773.1	lmo0242	-	hypothetical protein lmo0242			0.62	-0.08	0.129	-0.22	0.067	-0.26
IEJ01_08940	NP_465220.1	lmo1695	-	hypothetical protein lmo1695			0.335	-0.08	0.05	-0.17	0.734	-0.04
IEJ01_13945	NP_466171.1	lmo2649	ulaA	PTS system ascorbate transporter subunit IIC			0.835	-0.08	0	2.64	0	1.72
IEJ01_06550	NP_464771.1	lmo1246	-	ATP-dependent RNA helicase			0.479	-0.08	0.933	0.02	0.741	0.04
IEJ01_14635	NP_466294.1	lmo2772	-	PTS beta-glucoside transporter subunit IIABC			0.777	-0.08	0.675	0.06	0.479	-0.12
IEJ01_14890	NP_466343.1	lmo2821	-	internalin			0.642	-0.08	0.717	-0.06	0.707	0.06
IEJ01_09595	NP_465347.1	lmo1822	-	RNA-binding Sun protein			0.304	-0.08	0.79	-0.03	0.234	-0.1
IEJ01_08040	NP_465065.1	lmo1540	rpmA	50S ribosomal protein L27			0.369	-0.08	0.268	0.12	0.551	-0.06
IEJ01_04525	NP_464418.1	lmo0892	rsbU	serine phosphatase			0.365	-0.08	0.989	0	0.256	0.11
IEJ01_04745	NP_464457.1	lmo0932	-	hypothetical protein lmo0932			0.548	-0.08	0.9	-0.02	0.521	0.09
IEJ01_09390	NP_465306.1	lmo1781	-	hypothetical protein lmo1781			0.739	-0.09	0.684	0.06	0.329	0.17
IEJ01_10895	NP_465606.1	lmo2082	-	camphor resistance protein CrcB			0.728	-0.09	0.512	-0.1	0.995	0
IEJ01_07625	NP_464983.1	lmo1458	glyS	glycyl-tRNA synthetase subunit beta			0.488	-0.09	0.411	-0.11	0.044	-0.23
IEJ01_04475	NP_464408.1	lmo0882	-	hypothetical protein lmo0882			0.524	-0.09	0.005	0.34	0	0.5
IEJ01_14460	NP_466260.1	lmo2738	-	hemolysin			0.36	-0.09	0.99	0.01	0.446	0.08
IEJ01_06160	NP_464757.1	lmo1232	-	recombination and DNA strand exchange inhibitor protein			0.208	-0.09	0.605	0.05	0.137	-0.11
IEJ01_14520	NP_466272.1	lmo2750	-	para-aminobenzoate synthase subunit I			0.404	-0.09	0.477	-0.09	0.787	-0.03
IEJ01_05535	NP_464613.1	lmo1088	tagB	teichoic acid biosynthesis protein B			0.432	-0.09	0.659	-0.06	0.066	-0.19
IEJ01_00355	NP_463604.1	lmo0071	-	hypothetical protein lmo0071			0.716	-0.09	0.78	-0.05	0.511	-0.11
IEJ01_09495	NP_465327.1	lmo1802	-	DNA-binding protein			0.385	-0.09	0.516	0.08	0.117	0.16
IEJ01_05015	NP_464509.1	lmo0984	-	hypothetical protein lmo0984			0.743	-0.09	0.078	0.35	0.18	0.24
IEJ01_07570	NP_464972.1	lmo1447	zurA	metal (zinc) transport protein(ABC transporter, ATP-binding protein)			0.357	-0.09	0.684	-0.05	0.306	0.1
IEJ01_09695	NP_465367.1	lmo1842	-	hypothetical protein lmo1842			0.693	-0.09	0.287	0.16	0.045	0.35
IEJ01_01615	NP_463840.1	lmo0310	-	hypothetical protein lmo0310			0.793	-0.09	0.996	0	0.163	-0.27
IEJ01_13050	NP_466002.1	lmo2479	-	hypothetical protein lmo2479			0.495	-0.09	0.567	0.08	0.767	-0.04
IEJ01_05545	NP_464615.1	lmo1090	-	glycosyltransferase			0.435	-0.09	0.869	0.03	0.383	-0.1
IEJ01_10855	NP_465598.1	lmo2074	-	hypothetical protein lmo2074			0.292	-0.09	0.733	0.04	0.249	0.1
IEJ01_00015	NP_463536.1	lmo0003	-	hypothetical protein lmo0003			0.604	-0.09	0.501	-0.1	0.371	-0.13
IEJ01_07830	NP_465024.1	lmo1499	-	hypothetical protein lmo1499			0.241	-0.09	0.389	0.09	0.681	0.05
IEJ01_10780	NP_465583.1	lmo2059	-	potassium channel protein			0.39	-0.09	0.287	0.13	0.398	0.1
IEJ01_00375	NP_463609.1	lmo0076	-	O6-methylguanine-DNA methyltransferase			0.422	-0.09	0.786	-0.04	0.25	-0.13
IEJ01_09225	NP_465276.1	lmo1751	-	hypothetical protein lmo1751			0.555	-0.09	0.799	-0.04	0.86	-0.03
IEJ01_13985	NP_466179.1	lmo2657	-	deoxyguanosinetriphosphate triphosphohydrolase			0.425	-0.1	0.535	0.08	0.878	0.02
IEJ01_09405	NP_465309.1	lmo1784	rpmI	50S ribosomal protein L35			0.229	-0.1	0.001	0.29	0.16	0.13
IEJ01_02365	NP_463989.1	lmo0460	-	membrane associated lipoprotein			0.679	-0.1	0.262	-0.18	0.522	-0.11
IEJ01_04935	NP_464494.1	lmo0969	-	ribosomal large subunit pseudouridine synthetase			0.248	-0.1	0.372	0.09	0.476	-0.07
IEJ01_07260	NP_464910.1	lmo1385	-	hypothetical protein lmo1385			0.463	-0.1	0.727	0.06	0.636	0.07
IEJ01_09010	NP_465234.1	lmo1709	-	methionine aminopeptidase			0.147	-0.1	0.529	0.06	0.883	0.01
IEJ01_01990	NP_463915.1	lmo0385	-	IolC protein			0.838	-0.1	0.741	-0.03	0.959	-0.01
IEJ01_01450	NP_463808.1	lmo0277	-	oxidoreductase			0.195	-0.1	0.736	-0.04	0.022	-0.17
IEJ01_12060	NP_465835.1	lmo2311	-	hypothetical protein lmo2311			0.874	-0.1		-0.02		-0.08
IEJ01_03735	NP_464261.1	lmo0734	-	LacI family transcriptional regulator			0.391	-0.1	0.932	-0.02	0.785	0.04
IEJ01_08075	NP_465072.1	lmo1547	mreC	rod shape-determining protein MreC			0.281	-0.1	0.104	-0.16	0.01	-0.23
IEJ01_15060	NP_466377.1	lmo2855	rnpA	ribonuclease P			0.355	-0.1	0.648	-0.06	0.625	0.06
IEJ01_05195	NP_464545.1	lmo1020	-	hypothetical protein lmo1020			0.325	-0.1	0.942	0.01	0.879	0.02
IEJ01_07575	NP_464973.1	lmo1448	-	manganese-dependent inorganic pyrophosphatase			0.317	-0.1	0.933	0.01	0.841	-0.02
IEJ01_09965	NP_465420.1	lmo1896	asnC	asparaginyl-tRNA synthetase			0.239	-0.1	0.996	0	0.54	-0.06
IEJ01_11260	NP_465672.1	lmo2148	-	hypothetical protein lmo2148			0.416	-0.1	0.381	0.11	0.591	0.07
IEJ01_07620	NP_464982.1	lmo1457	-	hypothetical protein lmo1457			0.302	-0.1	0.976	-0.01	0.487	-0.08
IEJ01_06110	NP_464747.1	lmo1222	pheT	phenylalanyl-tRNA synthetase subunit beta			0.245	-0.1	0.82	0.03	0.254	-0.11
IEJ01_08980	NP_465228.1	lmo1703	-	RNA methyltransferase			0.328	-0.1	0.445	0.09	0.153	0.15
IEJ01_01090	NP_463751.1	lmo0220	ftsH	cell division protein FtsH	Yes		0.308	-0.1	0.13	-0.18	0.186	-0.14
IEJ01_07520	NP_464962.1	lmo1437	-	aspartate-semialdehyde dehydrogenase			0.149	-0.11	0.052	0.16	0.564	0.05
IEJ01_02265	NP_463970.1	lmo0441	-	D-alanyl-D-alanine carboxypeptidase			0.287	-0.11	0.62	0.06	0.436	0.09
IEJ01_01215	NP_463761.1	lmo0230	-	hypothetical protein lmo0230			0.551	-0.11	0.123	-0.24	0.06	-0.29
IEJ01_04505	NP_464414.1	lmo0888	-	hypothetical protein lmo0888			0.402	-0.11	0.925	0.02	0.718	-0.05
IEJ01_05500	NP_464606.1	lmo1081	-	glucose-1-phosphate thymidyl transferase			0.165	-0.11	0.89	-0.02	0.089	-0.14
IEJ01_12875	NP_465967.1	lmo2444	-	glycosidase			0.651	-0.11	0.5	-0.1	0.578	-0.09
IEJ01_05245	NP_464555.1	lmo1030	-	LacI family transcriptional regulator			0.442	-0.11	0.966	0.01	0.979	0
IEJ01_04005	NP_464315.1	lmo0788	-	hypothetical protein lmo0788			0.733	-0.11	0.983	-0.01	0.026	-0.58
IEJ01_00580	NP_463649.1	lmo0116	lmaC	hypothetical protein lmo0116			0.758	-0.11	0.93	-0.02	0.611	0.08
IEJ01_01250	NP_463768.1	lmo0237	gltX	glutamyl-tRNA synthetase			0.207	-0.11	0.894	-0.02	0.015	-0.21
IEJ01_10295	NP_465486.1	lmo1962	-	TetR family transcriptional regulator			0.688	-0.11	0.986	-0.01	0.608	-0.09
IEJ01_00635	NP_463660.1	lmo0127	-	hypothetical protein lmo0127			0.777	-0.11	0.98	0.01	0.325	0.16
IEJ01_08190	NP_465095.1	lmo1570	pykA	pyruvate kinase			0.202	-0.11	0.959	0.01	0.639	-0.05
IEJ01_12630	NP_465919.1	lmo2396	-	internalin			0.653	-0.11	0.691	0.06	0.731	-0.06
IEJ01_14925	NP_466350.1	lmo2828	-	hypothetical protein lmo2828			0.316	-0.11	0.284	0.13	0.734	-0.04
IEJ01_12840	NP_465961.1	lmo2438	-	hypothetical protein lmo2438			0.513	-0.11	0.931	0.02	0.927	-0.02
IEJ01_05060	NP_464518.1	lmo0993	-	Na+-transporting ATP synthase subunit J			0.298	-0.11	0.206	-0.15	0.876	0.02
IEJ01_00700	NP_463673.1	lmo0140	-	hypothetical protein lmo0140			0.524	-0.11	0.755	-0.05	0.275	-0.17
IEJ01_05585	NP_464642.1	lmo1117	-	hypothetical protein lmo1117			0.412	-0.11	0.76	0.05	0.306	0.13
IEJ01_06950	NP_464849.1	lmo1324	-	hypothetical protein lmo1324			0.314	-0.11	0.37	-0.11	0.492	-0.08
IEJ01_14280	NP_466224.1	lmo2702	recR	recombination protein RecR			0.147	-0.12	0.983	0.01	0.621	-0.05
IEJ01_03225	NP_464159.1	lmo0632	-	PTS fructose transporter subunit IIC			0.855	-0.12	0.957	0		-0.02
IEJ01_08100	NP_465077.1	lmo1552	valS	valyl-tRNA synthetase			0.203	-0.12	0.996	0	0.779	-0.03
IEJ01_02605	NP_464036.1	lmo0508	-	PTS galactitol transporter subunit IIC			0.679	-0.12	0.873	-0.03	0.511	0.11
IEJ01_05510	NP_464608.1	lmo1083	-	dTDP-D-glucose 4,6-dehydratase			0.178	-0.12	0.445	-0.08	0.236	-0.11
IEJ01_02040	NP_463925.1	lmo0395	-	blasticidin S-acetyltransferase			0.594	-0.12	0.718	-0.06	0.641	0.08
IEJ01_09560	NP_465340.1	lmo1815	-	hypothetical protein lmo1815			0.167	-0.12	0.97	-0.01	0.2	0.12
IEJ01_10825	NP_465592.1	lmo2068	groEL	molecular chaperone GroEL			0.331	-0.12	0.124	0.19	0.108	0.19
IEJ01_03410	NP_464195.1	lmo0668	-	ABC transporter permease			0.253	-0.12	0.99	0	0.275	-0.12
IEJ01_04850	NP_464477.1	lmo0952	-	hypothetical protein lmo0952			0.462	-0.12	0.011	0.37	0.014	0.35
IEJ01_12765	NP_465946.1	lmo2423	-	hypothetical protein lmo2423			0.512	-0.12	0.779	-0.05	0.294	0.16
IEJ01_08270	NP_465111.1	lmo1586	ppnK	inorganic polyphosphate/ATP-NAD kinase			0.268	-0.12	0.839	0.03	0.361	-0.1
IEJ01_06905	NP_464840.1	lmo1315	-	UDP pyrophosphate synthase			0.263	-0.12	0.057	-0.2	0.042	-0.21
IEJ01_01970	NP_463911.1	lmo0381	-	hypothetical protein lmo0381			0.768	-0.12	0.996	0	0.395	0.13
IEJ01_01065	NP_463746.1	lmo0215	-	hypothetical protein lmo0215			0.073	-0.12	0.373	-0.08	0.214	-0.1
IEJ01_12900	NP_465972.1	lmo2449	-	exoribonuclease RNase-R			0.399	-0.12	0.498	-0.1	0.058	-0.24
IEJ01_04905	NP_464488.1	lmo0963	-	heat shock protein HtpX			0.098	-0.12	0	0.29	0	0.31
IEJ01_06645	NP_464788.1	lmo1263	-	transcriptional regulator			0.842	-0.12	0.486	0.04		0
IEJ01_06970	NP_464853.1	lmo1328	truB	tRNA pseudouridine synthase B			0.186	-0.12	0.776	0.04	0.995	0
IEJ01_05340	NP_464574.1	lmo1049	-	molybdopterin biosynthesis protein MoeB			0.519	-0.12	0.983	0.01	0.047	-0.32
IEJ01_05125	NP_464531.1	lmo1006	-	aminotransferase			0.311	-0.12	0.974	0.01	0.904	0.02
IEJ01_05590	NP_464643.1	lmo1118	-	hypothetical protein lmo1118			0.291	-0.12	0.841	-0.03	0.389	-0.1
IEJ01_08280	NP_465113.1	lmo1588	argD	acetylornithine aminotransferase				-0.12		0.06		-0.01
IEJ01_04815	NP_464470.1	lmo0945	-	competence protein ComEC			0.165	-0.12	0.823	0.03	0	0.35
IEJ01_02450	NP_464005.1	lmo0477	-	secreted protein			0.601	-0.12	0.736	0.06	0.026	0.43
IEJ01_01925	NP_463903.1	lmo0373	-	PTS beta-glucoside transporter subunit IIC			0.681	-0.12	0.675	-0.06	0.349	-0.16
IEJ01_00730	NP_463679.1	lmo0146	-	hypothetical protein lmo0146			0.824	-0.12	0.739	-0.03		0
IEJ01_07580	NP_464974.1	lmo1449	-	endonuclease IV			0.137	-0.13	0.915	-0.02	0.557	-0.06
IEJ01_10220	NP_465471.1	lmo1947	resE	two-component sensor histidine kinas			0.143	-0.13	0.987	0	0.975	0
IEJ01_04455	NP_464404.1	lmo0878	-	oxidoreductase			0.782	-0.13	0.967	-0.01	0.884	-0.02
IEJ01_10085	NP_465444.1	lmo1920	-	hypothetical protein lmo1920			0.565	-0.13	0.655	-0.07	0.885	-0.03
IEJ01_07955	NP_465048.1	lmo1523	relA	(p)ppGpp synthetase			0.306	-0.13	0.914	-0.02	0.86	-0.03
IEJ01_10550	NP_465537.1	lmo2013	-	hypothetical protein lmo2013			0.557	-0.13	0.304	-0.16	0.675	-0.07
IEJ01_00950	NP_463723.1	lmo0192	-	PurR family transcriptional regulator			0.181	-0.13	0.839	0.03	0.859	-0.02
IEJ01_13445	NP_466080.1	lmo2557	-	lipid kinase			0.316	-0.13	0.273	-0.14	0.657	-0.06
IEJ01_07140	NP_464887.1	lmo1362	-	exodeoxyribonuclease VII small subunit			0.484	-0.13	0.933	-0.02	0.761	-0.05
IEJ01_09175	NP_465266.1	lmo1741	-	histidine kinase			0.131	-0.13	0.535	0.07	0.036	0.18
IEJ01_13410	NP_466073.1	lmo2550	-	glycosyl transferase			0.188	-0.13	0.931	0.02	0.062	0.19
IEJ01_02680	NP_464051.1	lmo0523	-	hypothetical protein lmo0523			0.297	-0.13	0	0.87	0	0.95
IEJ01_06065	NP_464738.1	lmo1213	-	hypothetical protein lmo1213			0.493	-0.13	0.823	0.04	0.179	0.21
IEJ01_06755	NP_464810.1	lmo1285	-	hypothetical protein lmo1285			0.357	-0.13	0.434	0.11	0.162	0.19
IEJ01_06815	NP_464822.1	lmo1297	-	aluminum resistance protein			0.215	-0.13	0.9	-0.02	0.353	0.1
IEJ01_06570	NP_464775.1	lmo1250	-	antibiotic resistance protein			0.385	-0.13	0.619	0.08	0.027	0.3
IEJ01_10455	NP_465518.1	lmo1994	-	LacI family transcriptional regulator			0.31	-0.13	0.257	-0.15	0.668	-0.06
IEJ01_07960	NP_465049.1	lmo1524	apt	adenine phosphoribosyltransferase			0.132	-0.13	0.622	-0.06	0.753	-0.03
IEJ01_08080	NP_465073.1	lmo1548	mreB	rod shape-determining protein MreB			0.057	-0.13	0.171	-0.11	0.062	-0.14
IEJ01_02670	NP_464049.1	lmo0521	-	6-phospho-beta-glucosidase			0.365	-0.13	0.929	-0.02	0.538	-0.09
IEJ01_04500	NP_464413.1	lmo0887	-	hypothetical protein lmo0887			0.444	-0.13	0.328	-0.14	0.064	-0.28
IEJ01_10075	NP_465442.1	lmo1918	-	hypothetical protein lmo1918			0.36	-0.13	0.169	-0.19	0.277	0.15
IEJ01_09670	NP_465362.1	lmo1837	pyrC	dihydroorotase	Yes		0.583	-0.13	0.308	-0.16	0.524	-0.11
IEJ01_06140	NP_464753.1	lmo1228	rnhC	ribonuclease HIII			0.152	-0.13	0.163	0.14	0.061	0.18
IEJ01_03915	NP_464297.1	lmo0770	-	LacI family transcriptional regulator			0.194	-0.14	0.086	-0.18	0.618	-0.06
IEJ01_04065	NP_464327.1	lmo0800	-	hypothetical protein lmo0800			0.425	-0.14	0.579	-0.09	0.603	-0.08
IEJ01_08705	NP_465197.1	lmo1672	menE	O-succinylbenzoic acid--CoA ligase			0.054	-0.14	0.026	-0.17	0.015	-0.18
IEJ01_03150	NP_464144.1	lmo0617	-	hypothetical protein lmo0617			0.542	-0.14	0.083	0.31	0.042	0.36
IEJ01_05090	NP_464524.1	lmo0999	-	hypothetical protein lmo0999			0.228	-0.14	0.734	-0.05	0.779	0.04
IEJ01_12260	NP_465864.1	lmo2341	-	sugar kinase			0.417	-0.14	0.193	0.19	0.761	0.05
IEJ01_10720	NP_465571.1	lmo2047	rpmF	50S ribosomal protein L32			0.232	-0.14	0.044	0.23	0	0.41
IEJ01_02415	NP_463998.1	lmo0469	-	hypothetical protein lmo0469			0.545	-0.14	0.428	-0.12	0.378	0.15
IEJ01_05505	NP_464607.1	lmo1082	-	dTDP-sugar epimerase			0.067	-0.14	0.93	-0.01	0.126	-0.13
IEJ01_07090	NP_464877.1	lmo1352	-	hypothetical protein lmo1352			0.228	-0.14	0.454	0.09	0.04	0.22
IEJ01_05190	NP_464544.1	lmo1019	-	hypothetical protein lmo1019			0.187	-0.14	0.495	0.09	0.223	0.13
IEJ01_12240	NP_465860.1	lmo2337	-	DeoR family transcriptional regulator			0.47	-0.14	0.023	0.39	0.363	0.14
IEJ01_12615	NP_465917.1	lmo2394	-	hypothetical protein lmo2394			0.59	-0.14	0.272	-0.17	0.48	-0.12
IEJ01_12905	NP_465973.1	lmo2450	-	carboxylesterase			0.376	-0.14	0.644	-0.07	0.459	-0.11
IEJ01_01055	NP_463744.1	lmo0213	pth	peptidyl-tRNA hydrolase			0.209	-0.14	0.967	-0.01	0.211	0.14
IEJ01_09970	NP_465421.1	lmo1897	aspB	aspartate aminotransferase			0.095	-0.14	0.704	-0.05	0.192	-0.13
IEJ01_13435	NP_466078.1	lmo2555	-	N-acetylglucosaminyl-phosphatidylinositol biosynthesis protein			0.02	-0.14	0.433	-0.07	0.585	-0.04
IEJ01_00325	NP_463598.1	lmo0065	-	hypothetical protein lmo0065			0.823	-0.14		-0.02		-0.06
IEJ01_01915	NP_463901.1	lmo0371	-	GntR family transcriptional regulator			0.114	-0.14	0.001	0.3	0	1.53
IEJ01_00690	NP_463671.1	lmo0138	-	hypothetical protein lmo0138			0.673	-0.14	0.384	-0.11	0.5	-0.11
IEJ01_08725	NP_465201.1	lmo1676	menF	menaquinone-specific isochorismate synthase			0.02	-0.14	0.033	-0.15	0.217	-0.09
IEJ01_07150	NP_464889.1	lmo1364	cspL	cold-shock protein			0.345	-0.14	0	0.51	0.122	0.22
IEJ01_00720	NP_463677.1	lmo0144	-	hypothetical protein lmo0144			0.563	-0.14	0.335	0.15	0.373	0.15
IEJ01_01295	NP_463777.1	lmo0246	nusG	transcription antitermination protein NusG			0.144	-0.14	0.035	0.22	0.001	0.32
IEJ01_13220	NP_466036.1	lmo2513	comFA	competence protein comFA			0.457	-0.14	0.808	0.04	0.758	0.05
IEJ01_14855	NP_466336.1	lmo2814	-	TetR family transcriptional regulator			0.562	-0.15	0.784	0.05	0.899	-0.02
IEJ01_13420	NP_466075.1	lmo2552	murZ	UDP-N-acetylglucosamine 1-carboxyvinyltransferase			0.04	-0.15	0.542	-0.06	0.596	-0.05
IEJ01_09460	NP_465320.1	lmo1795	-	hypothetical protein lmo1795			0.16	-0.15	0.13	-0.17	0.02	-0.24
IEJ01_05525	NP_464611.1	lmo1086	ispD	2-C-methyl-D-erythritol 4-phosphate cytidylyltransferase			0.129	-0.15	0.596	0.07	0.443	-0.08
IEJ01_00545	NP_463642.1	lmo0109	-	AraC family transcriptional regulator			0.423	-0.15	0.96	-0.01	0.007	-0.44
IEJ01_05880	NP_464701.1	lmo1176	eutC	ethanolamine ammonia-lyase small subunit			0.773	-0.15	0.566	-0.05	0.295	-0.12
IEJ01_01445	NP_463807.1	lmo0276	-	hypothetical protein lmo0276			0.313	-0.15	0	0.48	0.001	0.44
IEJ01_08975	NP_465227.1	lmo1702	-	glutathione transferase			0.201	-0.15	0.647	-0.07	0.878	-0.02
IEJ01_04225	NP_464360.1	lmo0833	-	transcriptional regulator			0.523	-0.15	0.275	-0.17	0.412	0.14
IEJ01_06010	NP_464727.1	lmo1202	cbiK	cobalt chelatase			0.75	-0.15	0.61	-0.05	0.625	-0.07
IEJ01_04400	NP_464393.1	lmo0867	-	hypothetical protein lmo0867			0.135	-0.15	0	0.45	0	0.66
IEJ01_07145	NP_464888.1	lmo1363	-	geranyltranstransferase			0.057	-0.15	0.1	-0.15	0.038	-0.17
IEJ01_11710	NP_465762.1	lmo2238	-	MFS transporter			0.418	-0.15	0.271	0.17	0.883	0.02
IEJ01_09550	NP_465338.1	lmo1813	-	phosphoglycerate dehydrogenase			0.107	-0.15	0.996	0	0.964	-0.01
IEJ01_03165	NP_464147.1	lmo0620	-	hypothetical protein lmo0620			0.252	-0.15	0.004	0.36	0.004	0.35
IEJ01_06900	NP_464839.1	lmo1314	frr	ribosome recycling factor			0.057	-0.15	0.887	0.02	0.189	-0.12
IEJ01_10625	NP_465552.1	lmo2028	-	hypothetical protein lmo2028			0.153	-0.16	0.865	-0.03	0.987	0
IEJ01_05850	NP_464695.1	lmo1170	-	PduX protein			0.287	-0.16	0.502	0.1	0.413	0.11
IEJ01_01085	NP_463750.1	lmo0219	-	hypothetical protein lmo0219			0.07	-0.16	0.963	0.01	0.193	0.12
IEJ01_05030	NP_464512.1	lmo0987	-	CylB protein			0.567	-0.16	0.763	0.05	0.258	0.2
IEJ01_11645	NP_465749.1	lmo2225	fumC	fumarate hydratase			0.082	-0.16	0.699	0.05	0.686	-0.04
IEJ01_00200	NP_463573.1	lmo0040	-	agmatine deiminase			0.329	-0.16	0.838	0.04	0.316	-0.15
IEJ01_12700	NP_465933.1	lmo2410	-	hypothetical protein lmo2410			0.679	-0.16	0.739	0.04	0.161	-0.26
IEJ01_05905	NP_464706.1	lmo1181	-	cobalamin adenosyl transferase			0.711	-0.16	0.134	-0.16	0.457	-0.11
IEJ01_00885	NP_463710.1	lmo0179	-	sugar ABC transporter permease			0.542	-0.16	0.486	0.1	0.656	0.08
IEJ01_02915	NP_464098.1	lmo0570	hisJ	histidinol-phosphatase			0.198	-0.16	0.539	0.09	0.681	0.06
IEJ01_12105	WP_014601514.1			hypothetical protein			0.693	-0.16		0		-0.02
IEJ01_01060	NP_463745.1	lmo0214	mfd	transcription-repair coupling factor			0.133	-0.16	0.97	0.01	0.714	0.05
IEJ01_09815	NP_465391.1	lmo1866	-	hypothetical protein lmo1866			0.269	-0.16	0.738	-0.06	0.804	-0.04
IEJ01_05980	NP_464721.1	lmo1196	-	cobalt-precorrin-6Y C(15)-methyltransferase			0.799	-0.16		-0.01		0
IEJ01_06155	NP_464756.1	lmo1231	-	DNA polymerase beta			0.027	-0.16	0.774	-0.04	0.222	-0.1
IEJ01_12480	NP_465890.1	lmo2367	pgi	glucose-6-phosphate isomerase			0.057	-0.16	0.461	-0.08	0.298	-0.1
IEJ01_12705	NP_465934.1	lmo2411	-	hypothetical protein lmo2411			0.03	-0.16	0.989	0	0.638	-0.05
IEJ01_11620	NP_465744.1	lmo2220	-	3\'-5\' exoribonuclease			0.078	-0.16	0.412	0.09	0.776	0.03
IEJ01_04450	NP_464403.1	lmo0877	-	glucosamine-6-phosphate isomerase			0.743	-0.16	0.622	-0.04	0.681	-0.05
IEJ01_06085	NP_464742.1	lmo1217	-	endo-1,4-beta-glucanase and to aminopeptidase			0.014	-0.17	0.255	0.1	0.212	0.1
IEJ01_12930	NP_465978.1	lmo2455	eno	phosphopyruvate hydratase			0.036	-0.17	0.842	-0.03	0.174	-0.12
IEJ01_09995	NP_465426.1	lmo1902	panB	3-methyl-2-oxobutanoate hydroxymethyltransferase			0.015	-0.17	0.932	-0.01	0.626	0.04
IEJ01_09260	NP_465283.1	lmo1758	ligA	NAD-dependent DNA ligase LigA			0.062	-0.17	0.419	-0.09	0.431	-0.08
IEJ01_06880	NP_464835.1	lmo1310	-	hypothetical protein lmo1310			0.281	-0.17	0.764	0.05	0.205	0.18
IEJ01_04835	NP_464474.1	lmo0949	-	hypothetical protein lmo0949			0.147	-0.17	0.086	0.2	0.091	0.19
IEJ01_04480	NP_464409.1	lmo0883	-	hypothetical protein lmo0883			0.039	-0.17	0.063	0.17	0.002	0.25
IEJ01_04360	NP_464386.1	lmo0860	-	sugar ABC transporter permease			0.757	-0.17	0.787	0.02	0.895	-0.02
IEJ01_03220	NP_464158.1	lmo0631	-	PTS fructose transporter subunit IIA			0.775	-0.17		0		-0.01
IEJ01_07600	NP_464978.1	lmo1453	-	hypothetical protein lmo1453			0.219	-0.17	0.213	-0.17	0.899	-0.02
IEJ01_06375	WP_009917713.1			hypothetical protein			0.763	-0.17	0.736	0.03	0.524	0.07
IEJ01_01270	NP_463772.1	lmo0241	-	hypothetical protein lmo0241			0.302	-0.17	0.89	-0.03	0.081	-0.26
IEJ01_00090	NP_463551.1	lmo0018	-	beta-glucosidase			0.142	-0.17	0.338	-0.12	0.01	-0.29
IEJ01_02530	NP_464021.1	lmo0493	-	acylase			0.269	-0.18	0.983	-0.01	0.289	0.15
IEJ01_08660	NP_465188.1	lmo1663	ansB	asparagine synthetase			0.016	-0.18	0.302	-0.1	0.896	-0.01
IEJ01_07735	NP_465005.1	lmo1480	rpsT	30S ribosomal protein S20			0.091	-0.18	0	0.59	0	0.66
IEJ01_11275	NP_465675.1	lmo2151	-	hypothetical protein lmo2151			0.35	-0.18	0.866	-0.03	0.154	-0.23
IEJ01_08250	NP_465107.1	lmo1582	-	hypothetical protein lmo1582			0.034	-0.18	0.996	0	0.044	0.18
IEJ01_08220	NP_465101.1	lmo1576	-	hypothetical protein lmo1576			0.232	-0.18	0.015	-0.35	0.014	-0.34
IEJ01_07990	NP_465055.1	lmo1530	tgt	queuine tRNA-ribosyltransferase			0.004	-0.18	0.93	0.02	0.522	0.05
IEJ01_12570	NP_465908.1	lmo2385	-	hypothetical protein lmo2385			0.11	-0.18	0.001	0.37	0.042	0.22
IEJ01_02410	NP_463997.1	lmo0468	-	hypothetical protein lmo0468			0.572	-0.18	0.434	-0.1	0.813	-0.04
IEJ01_07770	NP_465012.1	lmo1487	-	hypothetical protein lmo1487			0.033	-0.18	0.902	0.02	0.762	0.03
IEJ01_12660	NP_465925.1	lmo2402	-	hypothetical protein lmo2402			0.282	-0.18	0.615	-0.08	0.68	0.07
IEJ01_11760	NP_465772.1	lmo2248	-	hypothetical protein lmo2248			0.024	-0.18	0.868	0.02	0.596	0.05
IEJ01_04000	NP_464314.1	lmo0787	-	amino acid transporter			0.01	-0.18	0.567	-0.06	0.943	0.01
IEJ01_00685	NP_463670.1	lmo0137	-	peptide ABC transporter permease			0.086	-0.18	0.048	-0.22	0.133	-0.17
IEJ01_03715	NP_464257.1	lmo0730	-	hypothetical protein lmo0730			0.088	-0.19	0.992	0	0.795	-0.03
IEJ01_06885	NP_464836.1	lmo1311	-	hypothetical protein lmo1311			0.285	-0.19	0.943	-0.02	0.382	0.13
IEJ01_00980	NP_463729.1	lmo0198	glmU	bifunctional N-acetylglucosamine-1-phosphate uridyltransferase/glucosamine-1-phosphate acetyltransferase			0.011	-0.19	0.878	0.02	0.001	0.25
IEJ01_07695	NP_464997.1	lmo1472	dnaJ	molecular chaperone DnaJ			0.095	-0.19	0.486	0.09	0.798	-0.03
IEJ01_05725	NP_464670.1	lmo1145	-	PduV protein			0.674	-0.19	0.932	-0.01	0.998	0
IEJ01_06895	NP_464838.1	lmo1313	pyrH	uridylate kinase			0.055	-0.19	0.779	0.04	0.893	0.02
IEJ01_10845	NP_465596.1	lmo2072	-	redox-sensing transcriptional repressor Rex			0.081	-0.19	0.069	-0.2	0.117	-0.17
IEJ01_09410	NP_465310.1	lmo1785	infC	translation initiation factor IF-3			0.04	-0.19	0.05	0.21	0.017	0.24
IEJ01_06200	NP_464765.1	lmo1240	-	hypothetical protein lmo1240			0.007	-0.19	0.771	0.04	0.165	0.11
IEJ01_14990	NP_466364.1	lmo2842	-	LacI family transcriptional regulator			0.054	-0.19	0.664	-0.06	0.048	0.2
IEJ01_08635	NP_465183.1	lmo1658	rpsB	30S ribosomal protein S2			0.036	-0.19	0.001	0.3	0	0.51
IEJ01_02180	NP_463953.1	lmo0424	-	glucose uptake protein			0.281	-0.19	0.864	0.03	0.422	0.12
IEJ01_00935	NP_463720.1	lmo0189	-	Veg protein			0.133	-0.19	0.235	0.16	0.058	0.24
IEJ01_14810	NP_466327.1	lmo2805	-	hypothetical protein lmo2805			0.653	-0.19	0.461	0.08	0.283	0.17
IEJ01_13200	NP_466032.1	lmo2509	prfB	peptide chain release factor 2			0.106	-0.19	0.873	-0.03	0.229	0.15
IEJ01_10580	NP_465543.1	lmo2019	ileS	isoleucyl-tRNA synthetase			0.001	-0.19	0.996	0	0.632	-0.04
IEJ01_09040	NP_465239.1	lmo1714	-	hypothetical protein lmo1714			0.123	-0.19	0.99	0	0.718	0.05
IEJ01_13095	NP_466011.1	lmo2488	uvrA	excinuclease ABC subunit A			0.045	-0.2	0.669	-0.06	0.221	-0.13
IEJ01_09275	NP_465286.1	lmo1761	-	sodium-dependent transporter			0.095	-0.2	0.042	0.24	0.005	0.31
IEJ01_02535	NP_464022.1	lmo0494	-	hypothetical protein lmo0494			0.187	-0.2	0.312	0.14	0.176	0.19
IEJ01_04705	NP_464449.1	lmo0923	-	ABC transporter ATP-binding protein, partial			0.072	-0.2	0.525	-0.09	0.247	-0.13
IEJ01_10475	NP_465522.1	lmo1998	-	opine catabolism protein			0.344	-0.2	0.615	-0.08	0.308	-0.17
IEJ01_03920	NP_464298.1	lmo0771	-	hypothetical protein lmo0771			0.122	-0.2	0.739	0.05	0.138	0.19
IEJ01_12710	NP_465935.1	lmo2412	-	hypothetical protein lmo2412			0.016	-0.2	0.936	-0.01	0.589	-0.06
IEJ01_13650	NP_466113.1	lmo2590	-	ATP-binding protein			0.136	-0.2	0.892	-0.03	0.118	-0.2
IEJ01_08895	NP_465211.1	lmo1686	-	hypothetical protein lmo1686			0.002	-0.2	0.26	-0.1	0.117	-0.12
IEJ01_12065	WP_003747324.1			hypothetical protein			0.584	-0.2		0		-0.01
IEJ01_04520	NP_464417.1	lmo0891	rsbT	positive regulation of sigma-B activity			0.029	-0.2	0.866	-0.03	0.553	-0.07
IEJ01_09770	NP_465382.1	lmo1857	-	hypothetical protein lmo1857			0.076	-0.2	0.267	0.14	0.327	0.12
IEJ01_09420	NP_465312.1	lmo1787	rplS	50S ribosomal protein L19			0.283	-0.2	0.454	0.11	0.342	0.15
IEJ01_12715	NP_465936.1	lmo2413	-	aminotransferase			0.004	-0.21	0.836	-0.03	0.489	-0.06
IEJ01_13295	NP_466051.1	lmo2528	atpC	ATP synthase F0F1 subunit epsilon			0.068	-0.21	0.407	-0.11	0.119	-0.18
IEJ01_08055	NP_465068.1	lmo1543	-	ribonuclease G			0.1	-0.21	0.207	-0.16	0.149	-0.18
IEJ01_07765	NP_465011.1	lmo1486	-	hypothetical protein lmo1486			0.069	-0.21	0.717	0.05	0.278	0.13
IEJ01_03405	NP_464194.1	lmo0667	-	ABC transporter ATP-binding protein			0.038	-0.21	0.052	-0.2	0.032	-0.22
IEJ01_02635	NP_464042.1	lmo0514	-	internalin			0.206	-0.21	0.384	0.13	0	0.55
IEJ01_01500	NP_463818.1	lmo0287	-	two-component response regulator			0.007	-0.21	0.283	0.1	0.343	0.09
IEJ01_13325	NP_466057.1	lmo2534	atpE	ATP synthase F0F1 subunit C			0.025	-0.21	0.005	-0.27	0.001	-0.3
IEJ01_04075	NP_464329.1	lmo0802	-	hypothetical protein lmo0802			0.042	-0.21	0	0.37	0.016	0.24
IEJ01_09910	NP_465410.1	lmo1886	-	carboxypeptidase			0.005	-0.21	0.002	-0.24	0	-0.3
IEJ01_06700	NP_464799.1	lmo1274	-	polypeptide deformylase			0.372	-0.21	0.996	0	0.581	-0.09
IEJ01_14120	NP_466063.1	lmo2540	-	phosphatase			0.337	-0.21	0.811	0.04	0.228	0.2
IEJ01_01980	NP_463913.1	lmo0383	-	methylmalonate-semialdehyde dehydrogenase			0.654	-0.21	0.797	-0.03	0.218	-0.17
IEJ01_06695	NP_464798.1	lmo1273	rnhB	ribonuclease HII			0.009	-0.21	0.58	0.07	0.265	0.1
IEJ01_12255	NP_465863.1	lmo2340	-	hypothetical protein lmo2340			0.139	-0.21	0.158	0.2	0.898	0.02
IEJ01_12520	NP_465898.1	lmo2375	-	hypothetical protein lmo2375			0.237	-0.21	0.939	-0.02	0.902	-0.02
IEJ01_14570	NP_466282.1	lmo2760	-	ABC transporter ATP-binding protein			0.294	-0.21	0.996	0	0.662	0.07
IEJ01_06665	NP_464792.1	lmo1267	tig	trigger factor			0.001	-0.21	0.163	0.11	0.065	0.14
IEJ01_02445	NP_464004.1	lmo0476	-	oxetanocin A resistance protein OxrB			0.265	-0.22	0.334	0.15	0.159	0.23
IEJ01_02925	NP_464100.1	lmo0572	-	hypothetical protein lmo0572			0.083	-0.22	0.125	0.19	0.816	-0.03
IEJ01_06930	NP_464845.1	lmo1320	polC	DNA polymerase III PolC			0.014	-0.22	0.648	-0.06	0.755	-0.03
IEJ01_00860	NP_464354.1	lmo0827	-	transposase			0.294	-0.22	0.551	-0.09	0.589	-0.09
IEJ01_09915	NP_465411.1	lmo1887	-	hypothetical protein lmo1887			0.012	-0.22	0.021	-0.21	0.02	-0.21
IEJ01_10960	NP_465618.1	lmo2094	-	L-fuculose-phosphate aldolase	Yes		0.519	-0.22	0.435	-0.1	0.97	0.01
IEJ01_13545	NP_466100.1	lmo2577	-	hypothetical protein lmo2577			0.036	-0.22	0.387	0.11	0.457	0.08
IEJ01_10880	NP_465603.1	lmo2079	-	hypothetical protein lmo2079			0.003	-0.22	0	0.31	0	0.3
IEJ01_12970	NP_465987.1	lmo2464	-	transcriptional regulator	Yes		0.083	-0.22	0.674	0.06	0.409	0.11
IEJ01_06105	NP_464746.1	lmo1221	pheS	phenylalanyl-tRNA synthetase subunit alpha			0.016	-0.22	0.727	-0.05	0.066	-0.18
IEJ01_04710	NP_464450.1	lmo0925	-	hypothetical protein lmo0925			0.084	-0.22	0.873	-0.03	0.141	-0.19
IEJ01_02035	NP_463924.1	lmo0394	-	P60 protein			0.041	-0.22	0.398	-0.1	0.99	0
IEJ01_07095	NP_464878.1	lmo1353	-	hypothetical protein lmo1353			0.01	-0.22	0.287	0.11	0.014	0.22
IEJ01_10370	NP_465501.1	lmo1977	-	hypothetical protein lmo1977			0.042	-0.22	0.913	-0.02	0.327	-0.11
IEJ01_13215	NP_466035.1	lmo2512	comFC	competence protein ComFC			0.374	-0.22	0.982	0.01	0.525	0.11
IEJ01_01820	NP_463883.1	lmo0353	-	hypothetical protein lmo0353			0.284	-0.22	0.931	-0.02	0.944	0.01
IEJ01_05475	NP_464601.1	lmo1076	-	autolysin			0.002	-0.22	0.427	0.08	0.151	0.12
IEJ01_01360	NP_463790.1	lmo0259	rpoC	DNA-directed RNA polymerase subunit beta\'			0.031	-0.22	0.96	0.01	0.808	-0.03
IEJ01_12855	NP_465964.1	lmo2441	-	transcriptional regulator			0.16	-0.22	0.993	0	0.306	-0.15
IEJ01_00425	NP_463618.1	lmo0085	-	hypothetical protein lmo0085			0.72	-0.22		-0.02		-0.03
IEJ01_06000	NP_464725.1	lmo1200	-	cobalamin biosynthesis protein CbiJ			0.691	-0.22	0.892	0.01		0.02
IEJ01_06850	NP_464829.1	lmo1304	-	hypothetical protein lmo1304			0.012	-0.22	0.233	-0.12	0.393	-0.09
IEJ01_01635	NP_463844.1	lmo0314	-	hypothetical protein lmo0314			0.15	-0.22	0.643	-0.07	0.821	-0.04
IEJ01_01840	NP_463887.1	lmo0357	-	PTS sugar transporter subunit IIA			0.386	-0.22	0.653	0.07	0.003	-0.69
IEJ01_07775	NP_465013.1	lmo1488	nadD	nicotinic acid mononucleotide adenylyltransferase			0.044	-0.22	0.979	0.01	0.341	0.11
IEJ01_14920	NP_466349.1	lmo2827	-	MarR family transcriptional regulator			0.53	-0.22	0.886	-0.02	0.99	0
IEJ01_10925	NP_465611.1	lmo2087	-	hypothetical protein lmo2087			0.184	-0.22	0.466	-0.11	0.634	0.08
IEJ01_09885	NP_465405.1	lmo1881	-	5\'-3\' exonuclease			0.002	-0.22	0.511	-0.07	0.334	-0.09
IEJ01_09470	NP_465322.1	lmo1797	rpsP	30S ribosomal protein S16			0.029	-0.22	0.078	0.19	0.563	0.07
IEJ01_09535	NP_465335.1	lmo1810	-	fatty acid biosynthesis transcriptional regulator			0.008	-0.23	0.566	-0.07	0.076	0.16
IEJ01_05055	NP_464517.1	lmo0992	-	hypothetical protein lmo0992			0.033	-0.23	0.866	-0.03	0.809	0.03
IEJ01_06100	NP_464745.1	lmo1220	-	hypothetical protein lmo1220			0.147	-0.23	0.274	0.16	0.486	0.11
IEJ01_05495	NP_464605.1	lmo1080	-	teichoic acid biosynthesis protein GgaB			0	-0.23	0.98	0	0.459	-0.06
IEJ01_14495	NP_466267.1	lmo2745	-	ABC transporter ATP-binding protein			0.006	-0.23	0.573	-0.07	0.809	-0.03
IEJ01_06940	NP_464847.1	lmo1322	nusA	transcription elongation factor NusA			0.054	-0.23	0.743	-0.05	0.813	-0.03
IEJ01_01010	NP_463735.1	lmo0204	actA	actin-assembly inducing protein precursor			0.227	-0.23	0.763	-0.05	0.914	-0.02
IEJ01_06615	NP_464782.1	lmo1257	-	hypothetical protein lmo1257			0.426	-0.23	0.486	0.1	0.503	-0.1
IEJ01_03155	NP_464145.1	lmo0618	-	protein kinase			0.061	-0.23	0.981	0.01	0.94	0.01
IEJ01_09765	NP_465381.1	lmo1856	deoD	purine nucleoside phosphorylase			0.004	-0.23	0.932	-0.01	0.638	-0.05
IEJ01_08060	NP_465069.1	lmo1544	minD	septum formation inhibitor MinD			0	-0.23	0.644	0.05	0.286	-0.08
IEJ01_07085	NP_464876.1	lmo1351	-	hypothetical protein lmo1351			0.02	-0.23	0.001	0.34	0.018	0.24
IEJ01_06800	NP_464819.1	lmo1294	miaA	tRNA delta(2)-isopentenylpyrophosphate transferase			0.031	-0.23	0.866	-0.03	0.431	0.1
IEJ01_02735	NP_464062.1	lmo0534	-	hypothetical protein lmo0534			0.079	-0.23	0.974	-0.01	0.474	-0.1
IEJ01_11030	NP_465631.1	lmo2107	-	DeoR family transcriptional regulator			0.187	-0.23	0.988	0	0.318	-0.15
IEJ01_13255	NP_466043.1	lmo2520	-	O-succinylbenzoate-CoA synthase			0.065	-0.23	0.397	-0.11	0.248	-0.15
IEJ01_13365	NP_466064.1	lmo2541	-	tRNA threonylcarbamoyladenosine biosynthesis protein			0.004	-0.23	0.215	0.12	0	0.32
IEJ01_10470	NP_465521.1	lmo1997	-	PTS mannose transporter subunit IIA			0.336	-0.23	0.722	-0.06	0.252	-0.2
IEJ01_13245	NP_466041.1	lmo2518	-	LytR family transcriptional regulator			0.003	-0.24	0.501	-0.08	0.996	0
IEJ01_01605	WP_003724239.1			hypothetical protein			0.493	-0.24	0.896	0.02	0.879	-0.03
IEJ01_00900	NP_463713.1	lmo0182	-	alpha-glucosidase			0.101	-0.24	0.996	0	0.443	-0.11
IEJ01_13415	NP_466074.1	lmo2551	rho	transcription termination factor Rho			0.052	-0.24	0.893	-0.02	0.689	0.06
IEJ01_06945	NP_464848.1	lmo1323	-	hypothetical protein lmo1323			0.124	-0.24	0.572	-0.09	0.357	-0.13
IEJ01_14745	NP_466315.1	lmo2793	-	hypothetical protein lmo2793			0.031	-0.24	0.83	0.03	0.388	0.1
IEJ01_08135	NP_465084.1	lmo1559	thrS	threonyl-tRNA synthetase			0.01	-0.24	0.542	0.08	0.8	0.03
IEJ01_08425	NP_465141.1	lmo1616	-	hypothetical protein lmo1616			0.006	-0.24	0.61	0.06	0.002	0.27
IEJ01_06925	NP_464844.1	lmo1319	proS	prolyl-tRNA synthetase			0.001	-0.24	0.14	-0.12	0	-0.27
IEJ01_07795	NP_465017.1	lmo1492	-	hypothetical protein lmo1492			0.007	-0.24	0.166	0.14	0.003	0.27
IEJ01_08440	NP_465144.1	lmo1619	daaA	D-amino acid aminotransferase			0.004	-0.24	0.026	0.2	0.199	0.12
IEJ01_11825	NP_465785.1	lmo2261	-	hypothetical protein lmo2261			0.033	-0.24	0	0.42	0	0.57
IEJ01_10450	NP_465517.1	lmo1993	pdp	pyrimidine-nucleoside phosphorylase			0.042	-0.24	0.403	0.11	0.236	-0.15
IEJ01_08945	NP_465221.1	lmo1696	-	hypothetical protein lmo1696			0.006	-0.24	0.198	-0.13	0.879	0.02
IEJ01_04440	NP_464401.1	lmo0875	-	PTS beta-glucoside transporter subunit IIB			0.683	-0.24		0		0.01
IEJ01_14625	NP_466292.1	lmo2770	-	bifunctional glutamate--cysteine ligase/glutathione synthetase			0.019	-0.24	0.359	-0.11	0.916	-0.01
IEJ01_13320	NP_466056.1	lmo2533	atpF	ATP synthase F0F1 subunit B			0.011	-0.24	0.14	-0.16	0.009	-0.25
IEJ01_09985	NP_465424.1	lmo1900	panD	aspartate alpha-decarboxylase			0.007	-0.24	0.042	-0.2	0.655	0.05
IEJ01_06685	NP_464796.1	lmo1271	-	type I signal peptidase			0.002	-0.24	0.615	-0.06	0.094	0.14
IEJ01_13870	NP_466157.1	lmo2634	-	hypothetical protein lmo2634			0.007	-0.24	0.335	-0.11	0.306	-0.1
IEJ01_13315	NP_466055.1	lmo2532	atpH	ATP synthase F0F1 subunit delta			0.012	-0.25	0.053	-0.2	0.003	-0.29
IEJ01_07115	NP_464882.1	lmo1357	-	acetyl-CoA carboxylase biotin carboxylase subunit			0	-0.25	0.016	-0.17	0	-0.26
IEJ01_08405	NP_465137.1	lmo1612	-	hypothetical protein lmo1612			0.149	-0.25	0.866	0.03	0.2	-0.2
IEJ01_09400	NP_465308.1	lmo1783	rplT	50S ribosomal protein L20			0.01	-0.25	0.006	0.27	0.03	0.22
IEJ01_08180	NP_465093.1	lmo1568	-	hypothetical protein lmo1568			0.056	-0.25	0.042	-0.28	0.425	-0.11
IEJ01_06750	NP_464809.1	lmo1284	-	hypothetical protein lmo1284			0	-0.25	0.41	0.08	0.067	0.14
IEJ01_14690	NP_466304.1	lmo2782	-	PTS cellbiose transporter subunit IIB			0.699	-0.25		0.01		0.06
IEJ01_06985	NP_464856.1	lmo1331	pnpA	polynucleotide phosphorylase			0.013	-0.25	0.419	-0.1	0.473	-0.08
IEJ01_00105	NP_463554.1	lmo0021	-	PTS fructose transporter subunit IIA			0.608	-0.25	0.933	0.01	0.616	-0.06
IEJ01_04990	NP_464504.1	lmo0979	-	daunorubicin resistance ATP-binding protein			0.32	-0.25	0.861	-0.03	0	-1.16
IEJ01_11505	NP_465721.1	lmo2197	-	hypothetical protein lmo2197			0.098	-0.25	0.008	0.38	0.001	0.46
IEJ01_00010	NP_463535.1	lmo0002	dnaN	DNA polymerase III subunit beta			0.001	-0.25	0.738	0.04	0.856	0.02
IEJ01_11725	NP_465765.1	lmo2241	-	GntR family transcriptional regulator			0.068	-0.25	0.096	-0.23	0.413	-0.11
IEJ01_10520	NP_465531.1	lmo2007	-	hypothetical protein lmo2007			0.236	-0.25	0.041	-0.4	0.774	-0.05
[truncated: 927 more rows]
